# Supplementary material for: Identification of species by multiplex analysis of variable-length sequences
Source: PubMed Central journal article supplement — Nucleic Acids Res. 2010 Oct 4;38(22):e203. doi: 10.1093/nar/gkq865 (PMC3001097; doi:10.1093/nar/gkq865), 2010-10-04

# Supplementary Material

## Part 1

### Identification of species by multiplex analysis of variable-length sequences

Filipe Pereira<sup>1</sup>, João Carneiro<sup>1</sup>, Rune Matthiesen<sup>1</sup>, Barbara van Asch<sup>1,2</sup>, Nádía Pinto<sup>1,2,3</sup>, Leonor Gusmão<sup>1</sup> and António Amorim<sup>1,2</sup>

<sup>1</sup> Instituto de Patologia e Imunologia Molecular da Universidade do Porto (IPATIMUP), R. Dr. Roberto Frias s/n, 4200-465 Porto, Portugal

<sup>2</sup> Faculdade de Ciências da Universidade do Porto, Rua do Campo Alegre, s/n, 4169-007 Porto, Portugal

<sup>3</sup> Centro de Matemática da Universidade do Porto, Rua do Campo Alegre, s/n, 4169-007 Porto, Portugal

Supplementary Table S1. Taxonomic groups used in the development of the SPInDel method.

---

**Eukaryotes**

---

Eukaryota; Viridiplantae

Eukaryota; Stramenopiles

Eukaryota; Fungi

Eukaryota; Alveolata

Eukaryota; Metazoa; Porifera

Eukaryota; Metazoa; Cnidaria

Eukaryota; Metazoa; Platyhelminthes

Eukaryota; Metazoa; Echinodermata

Eukaryota; Metazoa; Nematoda

Eukaryota; Metazoa; Arthropoda

Eukaryota; Metazoa; Mollusca

Eukaryota; Metazoa; Chordata; Craniata; Vertebrata; Euteleostomi; Actinopterygii

Eukaryota; Metazoa; Chordata; Craniata; Vertebrata; Euteleostomi; Amphibia

Eukaryota; Metazoa; Chordata; Craniata; Vertebrata; Euteleostomi; Testudines

Eukaryota; Metazoa; Chordata; Craniata; Vertebrata; Euteleostomi; Lepidosauria

Eukaryota; Metazoa; Chordata; Craniata; Vertebrata; Euteleostomi; Archosauria; Dinosauria; Saurischia; Theropoda; Coelurosauria; Aves

Eukaryota; Metazoa; Chordata; Craniata; Vertebrata; Euteleostomi; Mammalia; Metatheria

Eukaryota; Metazoa; Chordata; Craniata; Vertebrata; Euteleostomi; Mammalia; Eutheria

---

**Prokaryotes**

---

Archaea; Crenarchaeota

Bacteria; Tenericutes

---

**Viruses**

---

Viruses; Retro-transcribing viruses; Retroviridae; Orthoretrovirinae; Lentivirus

Viruses; dsDNA viruses, no RNA stage; Papillomaviridae

Viruses; ssRNA negative-strand viruses; Mononegavirales; Rhabdoviridae

---

Supplementary Table S2. General description of ribosomal RNA gene sequence alignments in eukaryotic and prokaryotic groups.

| Taxonomic group         | Number of reference sequences (N) | Species with duplicated rRNAs | Number of haplotypes <sup>a</sup> | Number of sites in alignments | Number of sites without gaps | Number of sites with gaps |      | Number of variable sites <sup>a</sup> (S) |       | Number of mutations <sup>a</sup> (Eta) | Nucleotide diversity per site <sup>a</sup> (Pi) | GC content <sup>a</sup> |
|-------------------------|-----------------------------------|-------------------------------|-----------------------------------|-------------------------------|------------------------------|---------------------------|------|-------------------------------------------|-------|----------------------------------------|-------------------------------------------------|-------------------------|
|                         |                                   |                               |                                   |                               |                              | N <sup>o</sup>            | %    | N <sup>o</sup>                            | %     |                                        |                                                 |                         |
| <b>Eukaryotes</b>       |                                   |                               |                                   |                               |                              |                           |      |                                           |       |                                        |                                                 |                         |
| Viridiplantae (Vi)      | 23                                | 3                             | 17                                | 11260                         | 1856                         | 9404                      | 83.5 | 1198                                      | 64.55 | 1825                                   | 0.151                                           | 0.482                   |
| Stramenopiles (St)      | 14                                | 1                             | 14                                | 3299                          | 2224                         | 1075                      | 32.6 | 1312                                      | 58.99 | 1935                                   | 0.244                                           | 0.381                   |
| Fungi (Fu)              | 42                                | 0                             | 42                                | 12332                         | 1075                         | 11257                     | 91.3 | 909                                       | 84.56 | 1758                                   | 0.293                                           | 0.369                   |
| Alveolata (Al)          | 6                                 | 5                             | 6                                 | 2422                          | 2179                         | 243                       | 10.0 | 797                                       | 36.58 | 899                                    | 0.154                                           | 0.297                   |
| Porifera (Po)           | 20                                | 0                             | 20                                | 5674                          | 1582                         | 4092                      | 72.1 | 953                                       | 60.24 | 1447                                   | 0.192                                           | 0.402                   |
| Cnidaria (Cn)           | 32                                | 0                             | 29                                | 3169                          | 1341                         | 1828                      | 57.7 | 878                                       | 65.47 | 1334                                   | 0.218                                           | 0.377                   |
| Platyhelminthes (Pl)    | 29                                | 0                             | 29                                | 2196                          | 1248                         | 948                       | 43.2 | 868                                       | 69.55 | 1644                                   | 0.302                                           | 0.354                   |
| Echinodermata (Ec)      | 20                                | 0                             | 20                                | 1942                          | 814                          | 1128                      | 58.1 | 508                                       | 62.41 | 890                                    | 0.255                                           | 0.384                   |
| Nematoda (Ne)           | 29                                | 1                             | 29                                | 2170                          | 458                          | 1712                      | 78.9 | 424                                       | 92.58 | 801                                    | 0.329                                           | 0.250                   |
| Arthropoda (Ar)         | 204                               | 0                             | 204                               | 4112                          | 644                          | 3468                      | 84.3 | 513                                       | 79.66 | 1057                                   | 0.205                                           | 0.366                   |
| Mollusca (Mo)           | 50                                | 0                             | 50                                | 2043                          | 600                          | 1443                      | 70.6 | 448                                       | 74.67 | 1000                                   | 0.316                                           | 0.368                   |
| Actinopterygii (Ac)     | 539                               | 0                             | 536                               | 4223                          | 1653                         | 2570                      | 60.9 | 1217                                      | 73.62 | 2321                                   | 0.127                                           | 0.492                   |
| Amphibia (Am)           | 84                                | 0                             | 84                                | 2916                          | 1858                         | 1058                      | 36.3 | 1259                                      | 67.76 | 2271                                   | 0.201                                           | 0.407                   |
| Testudines (Te)         | 29                                | 0                             | 29                                | 3128                          | 2422                         | 706                       | 22.6 | 1120                                      | 46.24 | 1639                                   | 0.118                                           | 0.403                   |
| Lepidosauria (Le)       | 69                                | 0                             | 69                                | 3194                          | 1801                         | 1393                      | 43.6 | 1234                                      | 68.52 | 2378                                   | 0.239                                           | 0.447                   |
| Aves (Av)               | 98                                | 0                             | 97                                | 3014                          | 2335                         | 679                       | 22.5 | 1244                                      | 53.28 | 2181                                   | 0.149                                           | 0.466                   |
| Metatheria (Me)         | 31                                | 0                             | 31                                | 2767                          | 2378                         | 389                       | 14.1 | 1066                                      | 44.83 | 1826                                   | 0.148                                           | 0.384                   |
| Eutheria (Eu)           | 237                               | 0                             | 236                               | 3433                          | 2087                         | 1346                      | 39.2 | 1344                                      | 64.40 | 2343                                   | 0.134                                           | 0.417                   |
| <b>Prokaryotes</b>      |                                   |                               |                                   |                               |                              |                           |      |                                           |       |                                        |                                                 |                         |
| Crenarchaeota (Archaea) | 48                                | n/a                           | 44                                | 1387                          | 1243                         | 144                       | 10.4 | 588                                       | 47.30 | 867                                    | 0.124                                           | 0.642                   |
| Tenericutes (Bacteria)  | 57                                | n/a                           | 55                                | 1364                          | 1070                         | 294                       | 21.6 | 621                                       | 58.04 | 996                                    | 0.171                                           | 0.473                   |

<sup>a</sup> Sites with alignment gaps or missing data were excluded.

Supplementary Table S3. Classification performance obtained for two taxonomic groups on the species and genus level. The numbers in parenthesis represent the total number of classifications made followed by the total number of profiles in the database.

| Taxonomic group | Accuracy (species) | Accuracy (genus) |
|-----------------|--------------------|------------------|
| Actinopterygii  | 0.67 (14/539)      | 0.99 (167/539)   |
| Eutheria        | 1 (31/237)         | 0.96 (107/237)   |

Supplementary Table S4. Samples used in the development of the SPInDel profiling kit for identification of 10 eutherian species.

| Species                                 | <i>n</i> | Specimen      | Origin/breed                                                                                                  |
|-----------------------------------------|----------|---------------|---------------------------------------------------------------------------------------------------------------|
| Cat ( <i>Felis catus</i> )              | 10       | buccal swab   | Persian (1), Siamese (1), calico (2), undetermined (6)                                                        |
| Cattle ( <i>Bos taurus</i> )            | 10       | liver         | supermarket                                                                                                   |
| Dog ( <i>Canis familiaris</i> )         | 10       | blood         | Dogo Argentino (4), Serra de Aires (3), mixed-breed dogs (3)                                                  |
| Goat ( <i>Capra hircus</i> )            | 10       | blood         | Serrana (2), Serpentina (2), Bravia (2), Charnequeira (2), Algarvia (2)                                       |
| Horse ( <i>Equus caballus</i> )         | 2        | blood         | Iberian Peninsula                                                                                             |
| Human ( <i>Homo sapiens</i> )           | 10       | blood         | Iberian Peninsula                                                                                             |
| Mouse ( <i>Mus musculus</i> )           | 10       | liver         | inbred strains                                                                                                |
| Pig ( <i>Sus scrofa</i> )               | 12       | blood, liver  | supermarket (6), autochthonous Portuguese breeds (6)                                                          |
| Rabbit ( <i>Oryctolagus cuniculus</i> ) | 10       | blood, liver  | domestic/supermarket (6), wild/Northern Portugal (4)                                                          |
| Sheep ( <i>Ovis aries</i> )             | 10       | blood, muscle | Mondegueira (2), Merino Preto (2), Saloia (2), Campaniça (2), Churra Algarvia (1), Churra da Terra Quente (1) |

Supplementary Table S5. List of non-eutherian species tested with the SPInDel profiling kit.

| Species                                                | Class          |
|--------------------------------------------------------|----------------|
| Domestic chicken ( <i>Gallus gallus domesticus</i> )   | Aves           |
| Domestic turkey ( <i>Meleagris gallopavo</i> )         | Aves           |
| Squid ( <i>Loligo sp.</i> )                            | Cephalopoda    |
| Sardine ( <i>Sardina pilchardus</i> )                  | Actinopterygii |
| Pouting ( <i>Trisopterus luscus</i> )                  | Actinopterygii |
| Atlantic horse mackerel ( <i>Trachurus trachurus</i> ) | Actinopterygii |
| European hake ( <i>Merluccius merluccius</i> )         | Actinopterygii |
| Shrimp (Order Decapoda)                                | Malacostraca   |

Supplementary Table S6. General description of the seven SPInDel hypervariable regions used in the eutherian profiling kit.

| Localization               | Hypervariable region | Primer name             | Primer sequence (5'-3')    | Dye label | Nucleotide position of amplicon <sup>a</sup> |
|----------------------------|----------------------|-------------------------|----------------------------|-----------|----------------------------------------------|
| 12s rRNA                   | AC                   | A_F1                    | CCCCACGGGAAACAGCAG         | TET       | 803-1279                                     |
|                            |                      | A_F2                    | CCCCACGGGACTCAGCAG         |           |                                              |
|                            |                      | A_F3                    | CCCCAAGGGATACAGCAG         |           |                                              |
|                            |                      | A_F4                    | CCCCACGGGAGACAGCAG         |           |                                              |
|                            |                      | C_R1                    | GGTTTGCTGAAGATGGCGG        |           |                                              |
|                            | BC                   | B_F1                    | ACAATAGCTAAGACCCAAACTG     | TET       | 1051-1279                                    |
|                            |                      | B_F2                    | ACGATAGCTAAGGCCCAAAGT      |           |                                              |
|                            |                      | C_R1                    | GGTTTGCTGAAGATGGCGG        |           |                                              |
|                            | DE                   | D_F1                    | GGCAAGAAATGGGCTACATTTTC    | HEX       | 1350-1494                                    |
| D_F2                       |                      | GGGAAGAAATGGGCTACATTCTC |                            |           |                                              |
| E_R1                       |                      | GGTGACGGGCGGTGTGT       |                            |           |                                              |
| 12s rRNA-tRNA val-16s rRNA | FG                   | F_F1                    | GGTAAGTGTACTGGAAAGTG       | 6-FAM     | 1569-1921                                    |
| F_F2                       |                      | GGTAAGCATACCGGAAGGTG    |                            |           |                                              |
| G_R1                       |                      | TAGCTCGTCTGGTTTCGGG     |                            |           |                                              |
| 16s rRNA                   | HI                   | H_F1                    | GGCCTAAAAGCAGCCACCAAT      | TET       | 2173-2507                                    |
|                            |                      | H_F2                    | GGCCTAAAAGCAGCCATCAAT      |           |                                              |
|                            |                      | I_R1                    | TTT TTG GTA AAC AGG CGG GG |           |                                              |
|                            | JK                   | J_F1                    | GACGAGAAGACCCTATGGAG       | 6-FAM     | 2716-2827                                    |
|                            |                      | K_R1                    | TCCGAGGTCGCCCAACC          |           |                                              |
| 16s rRNA-tRNA leu          | LM                   | L_F1                    | GGGTTTACGACCTCGATGTTG      | 6-FAM     | 2975-3256                                    |
| M_R1                       |                      | GCGATTACCGGGCTCTGC      |                            |           |                                              |
| M_R2                       |                      | GCAGTTACCGGGCCCTG       |                            |           |                                              |
| M_R2                       |                      | GCAATTTCTGGCTCTGC       |                            |           |                                              |

<sup>a</sup> Numbered according to the human mtDNA reference sequence (Anderson et al. 1981. *Nature* 290:457)

Supplementary Table S7. Processed food products analyzed with the SPInDel profiling kit.

| Food product         | Food processing         | Labeled species         | Identified species                                              |
|----------------------|-------------------------|-------------------------|-----------------------------------------------------------------|
| Meatball             | Mechanical              | Cow                     | Cow                                                             |
| Pig ham              | Heat-cured              | Pig                     | Pig                                                             |
| Hamburger            | Mechanical              | Cow                     | Cow                                                             |
| Turkey sausage       | Heat-cured              | Turkey and pig          | Turkey <sup>a</sup> and pig <sup>b</sup>                        |
| Pig sausage          | Heat-cured              | Pig                     | Pig                                                             |
| Pig sausage          | Slowly dried over smoke | Pig                     | Pig                                                             |
| Pig sausage          | Heat-cured              | Pig and chicken         | Pig <sup>c</sup> and chicken <sup>a</sup>                       |
| Meat mixture sausage | Heat-cured              | Pig and cow             | Pig and cow                                                     |
| Meat mixture sausage | Heat-cured              | Turkey, chicken and pig | Turkey <sup>a</sup> , chicken <sup>a</sup> and pig <sup>c</sup> |

<sup>a</sup> Identified by comparison with reference profiles. <sup>b</sup> Partial *Sus scrofa* profile with amplified products for loci JK, DE, BC, LM and HI. <sup>c</sup> Partial *Sus scrofa* profile with amplified products for loci JK, DE, BC, LM, HI and FG



Supplementary Table S8. List of species with equal standard SPInDel profiles.

| Taxonomic group     | Species with shared SPInDel profiles                                                                                                                                                                                                                                                                                                                                                                                                                                                                                                                                                                                                                                                                                                                                                                                             |
|---------------------|----------------------------------------------------------------------------------------------------------------------------------------------------------------------------------------------------------------------------------------------------------------------------------------------------------------------------------------------------------------------------------------------------------------------------------------------------------------------------------------------------------------------------------------------------------------------------------------------------------------------------------------------------------------------------------------------------------------------------------------------------------------------------------------------------------------------------------|
| <b>Eukaryotes</b>   |                                                                                                                                                                                                                                                                                                                                                                                                                                                                                                                                                                                                                                                                                                                                                                                                                                  |
| Viridiplantae (Vi)  | > <i>Zea mays subsp. mays</i> (NC 007982.1) / <i>Zea mays subsp. parviglumis</i> (NC 008332.1)<br>> <i>Oryza sativa Indica Group</i> (NC 007886.1) / <i>Oryza sativa Japonica Group</i> (NC 011033.1)                                                                                                                                                                                                                                                                                                                                                                                                                                                                                                                                                                                                                            |
| Fungi (Fu)          | > <i>Aspergillus tubingensis</i> (NC 007597.1) / <i>Aspergillus niger</i> (NC 007445.1)                                                                                                                                                                                                                                                                                                                                                                                                                                                                                                                                                                                                                                                                                                                                          |
| Cnidaria (Cn)       | > <i>Pocillopora eydouxi</i> (NC 009798.1) / <i>Pocillopora damicornis</i> (NC 009797.1)<br>> <i>Montastraea franksi</i> (NC 007225.1) / <i>Montastraea annularis</i> (NC 007224.1) / <i>Montastraea faveolata</i> (NC 007226.1)                                                                                                                                                                                                                                                                                                                                                                                                                                                                                                                                                                                                 |
| Echinodermata (Ec)  | > <i>Strongylocentrotus droebachiensis</i> (NC 009940.1) / <i>Strongylocentrotus pallidus</i> (NC 009941.1)                                                                                                                                                                                                                                                                                                                                                                                                                                                                                                                                                                                                                                                                                                                      |
| Nematoda (Ne)       | > <i>Caenorhabditis elegans</i> (NC 001328.1) / <i>Caenorhabditis briggsae</i> (NC 009885.1)                                                                                                                                                                                                                                                                                                                                                                                                                                                                                                                                                                                                                                                                                                                                     |
| Arthropoda (Ar)     | > <i>Bactrocera carambolae</i> (NC 009772.1) / <i>Bactrocera papayae</i> (NC 009770.1)<br>> <i>Bactrocera dorsalis</i> (NC 008748.1) / <i>Bactrocera philippinensis</i> (NC 009771.1)<br>> <i>Drosophila melanogaster</i> (NC 001709.1) / <i>Drosophila simulans</i> (NC 005781.1)<br>> <i>Eriocheir hepuensis</i> (NC 011598.1) / <i>Eriocheir sinensis</i> (NC 006992.1)                                                                                                                                                                                                                                                                                                                                                                                                                                                       |
| Mollusca (Mo)       | > <i>Mytilus edulis</i> (NC 006161.1) / <i>Mytilus galloprovincialis</i> (NC 006886.1)                                                                                                                                                                                                                                                                                                                                                                                                                                                                                                                                                                                                                                                                                                                                           |
| Actinopterygii (Ac) | > <i>Exocoetus volitans</i> (NC 003184.1) / <i>Cypselurus hiraii</i> (NC 007403.1)<br>> <i>Beryx decadactylus</i> (NC 004393.1) / <i>Beryx splendens</i> (NC 003188.1)<br>> <i>Oncorhynchus keta</i> (NC 009261.1) / <i>Oncorhynchus masou ishikawae</i> (NC 008746.1) / <i>Oncorhynchus masou formosanus</i> (NC 008745.1) / <i>Oncorhynchus masou masou</i> (NC 008747.1) / <i>Oncorhynchus masou 'Biwa'</i> (NC 009262.1)<br>> <i>Anguilla bicolor bicolor</i> (NC 006534.1) / <i>Anguilla bicolor pacifica</i> (NC 006535.1)<br>> <i>Anguilla nebulosa nebulosa</i> (NC 006544.1) / <i>Anguilla bengalensis labiata</i> (NC 006543.1)<br>> <i>Salvelinus alpinus</i> (NC 000861.1) / <i>Salvelinus fontinalis</i> (NC 000860.1)<br>> <i>Canthigaster coronata</i> (NC 010978.1) / <i>Canthigaster rivulata</i> (NC 010979.1) |

---

|               |                                                                                                                                                                                                                                                                                                                                                                                                                                                                                                                                                                                                                                                                                                                                                                                                                                                                                                                                                                                                                                                                                                                                                                                                                                                                                                                                                                                                                                                                                                                                                                                                                                          |
|---------------|------------------------------------------------------------------------------------------------------------------------------------------------------------------------------------------------------------------------------------------------------------------------------------------------------------------------------------------------------------------------------------------------------------------------------------------------------------------------------------------------------------------------------------------------------------------------------------------------------------------------------------------------------------------------------------------------------------------------------------------------------------------------------------------------------------------------------------------------------------------------------------------------------------------------------------------------------------------------------------------------------------------------------------------------------------------------------------------------------------------------------------------------------------------------------------------------------------------------------------------------------------------------------------------------------------------------------------------------------------------------------------------------------------------------------------------------------------------------------------------------------------------------------------------------------------------------------------------------------------------------------------------|
|               | <ul style="list-style-type: none"> <li>&gt; <i>Carassius auratus</i> x <i>Cyprinus carpio</i> x <i>Carassius cuvieri</i> (NC 006387.1) / <i>Carassius carassius</i> (NC 006291.1) / <i>Carassius auratus</i> (NC 002079.1) / <i>Carassius auratus</i> x <i>Cyprinus carpio</i> (NC 006136.1) / <i>Carassius auratus auratus</i> (NC 006580.1)</li> <li>&gt; <i>Pseudaspius leptcephalus</i> (NC 008681.1) / <i>Tribolodon nakamurai</i> (NC 008651.1)</li> <li>&gt; <i>Eutaeniophorus festivus</i> (NC 012043.1) / <i>Ataxolepis apus</i> (NC 012045.1)</li> <li>&gt; <i>Takifugu oblongus</i> (NC 011634.1) / <i>Takifugu ocellatus</i> (NC 011635.1)</li> <li>&gt; <i>Takifugu obscures</i> (NC 011626.1) / <i>Takifugu pardalis</i> (NC 011627.1) / <i>Takifugu chinensis</i> (NC 011633.1) / <i>Takifugu poecilonotus</i> (NC 011621.1) / <i>Takifugu exascurus</i> (NC 011622.1) / <i>Takifugu stictonotus</i> (NC 011629.1) / <i>Takifugu snyderi</i> (NC 011630.1)</li> <li>&gt; <i>Hippoglossus hippoglossus</i> (NC 009709.1) / <i>Hippoglossus stenolepis</i> (NC 009710.1)</li> <li>&gt; <i>Trachurus trachurus</i> (NC 006818.1) / <i>Trachurus japonicus</i> (NC 002813.1)</li> <li>&gt; <i>Cetostoma regani</i> (NC 004389.1) / <i>Eutaeniophorus</i> sp. 033 Miya (NC 004390.1)</li> <li>&gt; <i>Scobinichthys granulatus</i> (NC 011926.1) / <i>Nelusetta ayraudi</i> (NC 011921.1)</li> <li>&gt; <i>Acanthaluteres brownii</i> (NC 011947.1) / <i>Meuschenia hippocrepis</i> (NC 011956.1)</li> <li>&gt; <i>Xenobalistes tumidipectoris</i> (NC 011321.1) / <i>Xanthichthys auromarginatus</i> (NC 011945.1)</li> </ul> |
| Amphibia (Am) | > <i>Ambystoma andersoni</i> (NC 006888.1) / <i>Ambystoma tigrinum tigrinum</i> (NC 006887.1) / <i>Ambystoma mexicanum</i> (NC 005797.1)                                                                                                                                                                                                                                                                                                                                                                                                                                                                                                                                                                                                                                                                                                                                                                                                                                                                                                                                                                                                                                                                                                                                                                                                                                                                                                                                                                                                                                                                                                 |
| Aves (Av)     | > <i>Gallus gallus</i> (NC 001323.1) / <i>Gallus gallus spadiceus</i> (NC 007235.1) / <i>Gallus gallus gallus</i> (NC 007236.1) / <i>Gallus gallus bankiva</i> (NC 007237.1)                                                                                                                                                                                                                                                                                                                                                                                                                                                                                                                                                                                                                                                                                                                                                                                                                                                                                                                                                                                                                                                                                                                                                                                                                                                                                                                                                                                                                                                             |
| Eutheria (Eu) | <ul style="list-style-type: none"> <li>&gt; <i>Bison bison</i> (NC 012346.1) / <i>Bos indicus</i> (NC 005971.1)</li> <li>&gt; <i>Canis lupus lupus</i> (NC 009686.1) / <i>Canis lupus familiaris</i> (NC 002008.4)</li> <li>&gt; <i>Loxodonta africana</i> (NC 000934.1) / <i>Mammuthus primigenius</i> (NC 007596.2)</li> <li>&gt; <i>Mus musculus castaneus</i> (NC 012387.1) / <i>Mus musculus</i> (NC 005089.1) / <i>Mus musculus domesticus</i> (NC 006914.1)</li> <li>&gt; <i>Mus musculus molossinus</i> (NC 006915.1) / <i>Mus musculus musculus</i> (NC 010339.1)</li> <li>&gt; <i>Lama guanicoe</i> (NC 011822.1) / <i>Lama glama</i> (NC 012102.1)</li> <li>&gt; <i>Delphinus capensis</i> (NC 012061.1) / <i>Stenella attenuata</i> (NC 012051.1) / <i>Tursiops aduncus</i> (NC 012058.1) / <i>Tursiops truncatus</i> (NC 012059.1) / <i>Stenella coeruleoalba</i> (NC 012053.1) / <i>Sousa chinensis</i> (NC 012057.1)</li> <li>&gt; <i>Phoca largha</i> (NC 008430.1) / <i>Phoca hispida</i> (NC 008433.1) / <i>Phoca vitulina</i> (NC 001325.1)</li> <li>&gt; <i>Ursus thibetanus mupinensis</i> (NC 008753.1) / <i>Ursus americanus</i> (NC 003426.1)</li> <li>&gt; <i>Ursus thibetanus thibetanus</i> (NC 011118.1) / <i>Ursus thibetanus</i> (NC 009971.1)</li> </ul>                                                                                                                                                                                                                                                                                                                                                  |

---

---

**Prokaryotes**

---

- Crenarchaeota
- > *Geogemma indica* str. 296 (DQ492260.1) / *Hyperthermus butylicus* str. DSM 5456 (NC 008818.1)
  - > *Metallosphaera sedula* str. DSM 5348 (NC 009440.1) / *Metallosphaera prunae* str. Ron12/II = DSM 10039 (X90482.1) / *Ignisphaera aggregans* str. AQ1.S1 (DQ060321.1)
  - > *Pyrobaculum calidifontis* str. JCM 11548 (NC 009073.1) / *Thermoproteus tenax* str. YS44 (AY538162.2) / *Pyrobaculum organotrophum* str. JCM 9190 (AB063647.1) / *Pyrobaculum islandicum* str. DSM 4184 (NC 008701.1) / *Pyrobaculum neutrophilum* str. NZ1 (X81886.1)
  - > *Sulfolobus acidocaldarius* str. DSM 639 (NC 007181.1) / *Sulfolobus thuringiensis* str. Ron12/I (X90485.1) / *Sulfolobus solfataricus* (X03235.1)
  - > *Sulfolobus tokodaii* str. 7 (NC 003106.2) / *Sulfolobus islandicus* str. M.14.25 (CP001400.1)
  - > *Desulfurococcus kamchatkensis* str. 1221n (EU167539.2) / *Desulfurococcus mobilis* (M36474.1) / *Staphylothermus marinus* (X99560.1)
- 
- Tenericutes
- > Candidatus *Mycoplasma turicensis* str. IT226 (EU839977.1) / *Mycoplasma haemofelis* str. IT14 (EU839978.1)
  - > Uncultured *Anaeroplasm* sp. clone EMP E27 (EU794313.1) / Uncultured *Anaeroplasm* sp clone EMPL44 (EU794312.1)
  - > Candidatus *Phytoplasma australiense* isolate NZ09156 (FJ943262.1) / *Papaya phytoplasma* TW (AJ919994.2) / Salt cedar witches'-broom phytoplasma str. SCWB1 (FJ432664.1) / *Iranian plum phytoplasma* PJ15 (FJ409624.1) / Candidatus *Phytoplasma solani* isolate 25-5-48 (EU814640.1)
  - > Russian olive witches'-broom phytoplasma str. Uromia (EU886968.1) / *Aster yellows phytoplasma* (AY549311.2) / Mulberry dwarf phytoplasma str. NY (EU999736.1) / Paulownia witches'-broom phytoplasma str. PaWB-Beijing (FJ263621.1) / Candidatus *Phytoplasma asteris* (FJ429364.1)
  - > Jujube witches'-broom phytoplasma str. NY1 (EU999739.1) / Candidatus *Phytoplasma ulmi* str. EYCZ1 (EU184021.1)
  - > *Mycoplasma wenyonii* Fengdu (FJ375309.1) / *Mycoplasma suis* str. SC (FJ263943.1)
  - > *Mycoplasma iguanae* str. 2327 (EU859973.1) / *Mycoplasma* sp. A1802T str. A1802 (FM165075.1) / *Mycoplasma arthritidis* str. 158L3-1 (CP001047.1) / *Mycoplasma canadense* str. 466 (EU925158.1) / *Mycoplasma* sp. 237IAT str. 237IA (FM165077.1) / *Mycoplasma zalophi* str. CSL 7520 (FJ226581.1)
  - > *Mycoplasma citelli* str. RG1D-L (EU925165.1) / *Mycoplasma columborale* str. 18303 (EU859977.1)
  - > *Ureaplasma urealyticum* serovar 10 str. ATCC 33699 (NC 011374.1) / *Ureaplasma urealyticum* serovar 12 str. ATCC 33696 (AAZT01000001.1) / Uncultured *Ureaplasma* sp. clone VE12C09 (GQ179714.1)
  - > *Mycoplasma fermentans* str. PG-18 (FJ226561.1) / *Mycoplasma phocirhinis* str. CSL 7475-4 (EU827598.1) / *Mycoplasma canimucosale* str. HRC689 (EU797451.1)
-

---

**Viruses**

---

*Lentivirus* > *Human immunodeficiency virus 2* (NC 001722.1) / *Simian-Human immunodeficiency virus* (NC 001870.1)  
> *Simian immunodeficiency virus SIV-mnd 2* (NC 004455.1) / *Human immunodeficiency virus 1* (NC 001802.1)  
> *Visna/Maedi virus* (NC 001452.1) / *Ovine lentivirus* (NC 001511.1) / *Caprine arthritis encephalitis virus* (NC 001463.1)

---

*Papillomaviridae* > *Bovine papillomavirus 5* (NC 004195.1) / *Bovine papillomavirus 8* (NC 009752.1)  
> *Mastomys coucha papillomavirus 2* (NC 008519.1) / *Old World harvest mouse papillomavirus* (NC 008582.1)  
> *Deer papillomavirus* (NC 001523.1) / *Common chimpanzee papillomavirus 1* (NC 001838.1)  
> *Human papillomavirus type 26* (NC 001583.1) / *European elk papillomavirus* (NC 001524.1)  
> *Human papillomavirus type 5* (NC 001531.1) / *Human papillomavirus type 99* (NC 012745.1) / *Human papillomavirus RTRX7* (NC 004761.1)  
> *Human papillomavirus type 9* (NC 001596.1) / *Human papillomavirus type 113* (NC 012748.1)  
> *Caretta caretta papillomavirus 1* (NC 011530.1) / *Chelonia mydas papillomavirus 1* (NC 011531.1)  
> *Human papillomavirus type 24* (NC 001683.1) / *Human papillomavirus type 98* (NC 012744.2)  
> *Equine papillomavirus 1* (NC 004194.1) / *Equus caballus papillomavirus 1* (NC 003748.1)

---

*Rhabdoviridae* > *Lettuce yellow mottle virus* (NC 011532.1) / *Lettuce necrotic yellows virus* (NC 007642.1)  
> *Snakehead rhabdovirus* (NC 000903.1) / *Viral hemorrhagic septicemia virus* (NC 000855.1)  
> *Infectious hematopoietic necrosis virus* (NC 001652.1) / *Hirame rhabdovirus* (NC 005093.1)  
> *Vesicular stomatitis Indiana virus* (NC 001560.1) / *Tupaia virus* (NC 007020.1)  
> *Australian bat lyssavirus* (NC 003243.1) / *Mokola virus* (NC 006429.1) / *European bat lyssavirus 2* (NC 009528.1) / *European bat lyssavirus 1* (NC 009527.1) / *Rabies virus* (NC 001542.1)  
> *Maize mosaic virus* (NC 005975.1) / *Taro vein chlorosis virus* (NC 006942.1)

---

Supplementary Table S9. Comparison of molecular methods for species identification.

| Method                                                        |                              | Time/run                  | Cost/independent read or run (US\$)       |
|---------------------------------------------------------------|------------------------------|---------------------------|-------------------------------------------|
| Synthetic chain-terminator chemistry (Sanger method)          |                              | 1-3 hours <sup>a</sup>    | 0.80 <sup>b</sup>                         |
| Next-generation sequencing platforms                          | Pyrosequencing               | 7-8 hours <sup>a,c</sup>  | 8,439 <sup>c</sup>                        |
|                                                               | Clonal single molecule array | 2-5 days <sup>a,c,d</sup> | 8,950 <sup>c</sup><br>6,300 <sup>d</sup>  |
|                                                               | Sequencing-by-ligation       | 3-5 days <sup>a,c</sup>   | 17,447 <sup>c</sup><br>7,700 <sup>d</sup> |
| Real-time PCR                                                 |                              | 1 day <sup>e</sup>        | 450 <sup>e</sup>                          |
| SPInDel by automated fluorescent DNA fragment length analysis |                              | 1 hour                    | 0.76 <sup>f</sup>                         |

<sup>a</sup> Hodgson, J. The Evolution of Sequencing Technology. Science posters. <http://www.sciencemag.org/products/>

<sup>b</sup> Ryan, D. *et al.* (2007) *Trends Biotechnol.* **25**, 385-389.

<sup>c</sup> Mardis, E.R. (2008) *Trends Genet.* **24**, 133-141.

<sup>d</sup> Hert, D.G., Fredlake, C.P. and Barron, A.E. (2008) *Electrophoresis.* **29**, 4618-4626.

<sup>e</sup> Ahmed, F.E (2002) *Trends Biotechnol.* **20**, 215-223.

<sup>f</sup> Our estimate includes instrument maintenance, labor, reagents and disposables costs.

Supplementary Figure S1. Ribosomal RNA gene regions used in the development of the SPInDel method. The scheme represents the most common genomic architecture observed in 18 eukaryotic groups (introns and rare genomic rearrangements are not represented). The large subunit rRNA gene was annotated on reference sequences as 26S rRNA, rrn26 rRNA or 26Srrn (in Viridiplantae), 21S rRNA or 23S rRNA (in Fungi), rnl b1 rRNA or rnl b2 rRNA (in some Alveolata species with two rRNA gene copies) and rnl rRNA, rrnL rRNA, LSU rRNA, l-rRNA and 16S rRNA in most taxonomic groups. The small subunit rRNA gene was also annotated as s-rRNA, rrnS rRNA, rnr1 rRNA and 12S rRNA.

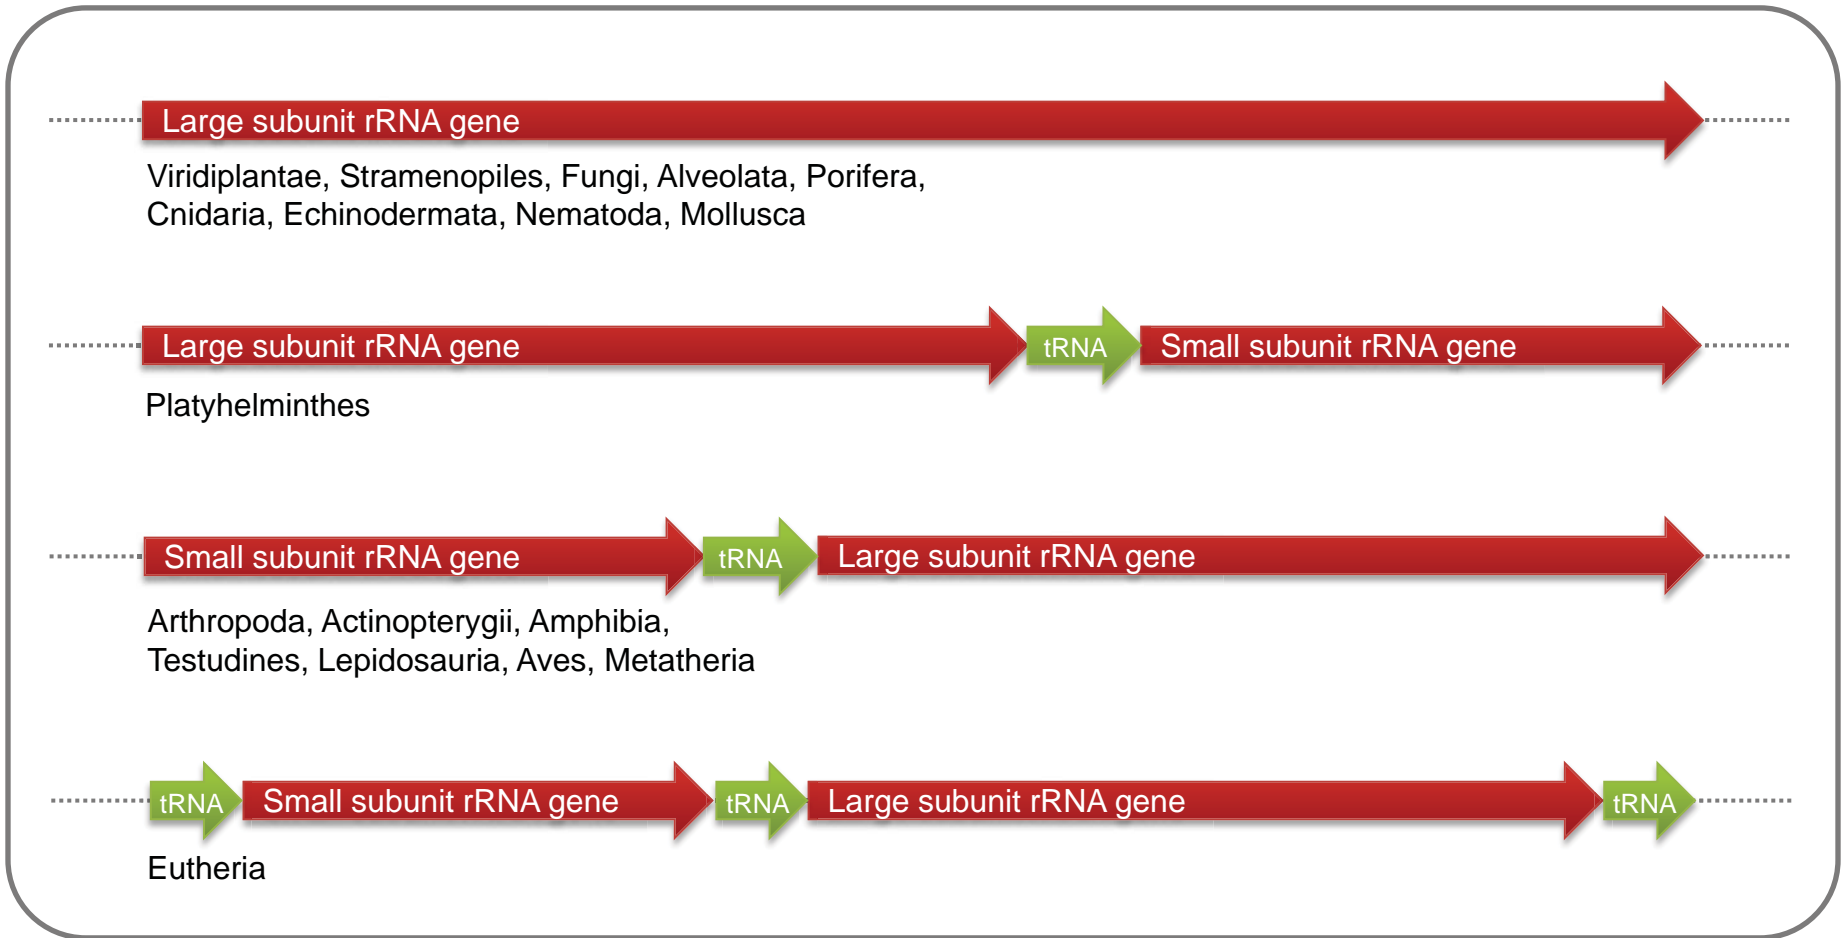

Supplementary Figure S2. Sliding window analysis of nucleotide diversity ( $\pi$ ) and the number of segregating sites (S) across ribosomal RNA gene alignments in 18 eukaryotic groups. A window of 100 nucleotides (sites with alignment gaps were counted in the window length) was slid along the alignment in one nucleotide steps. Values for each parameter were assigned to the nucleotide at the midpoint of each window.

Supplementary Figure S2

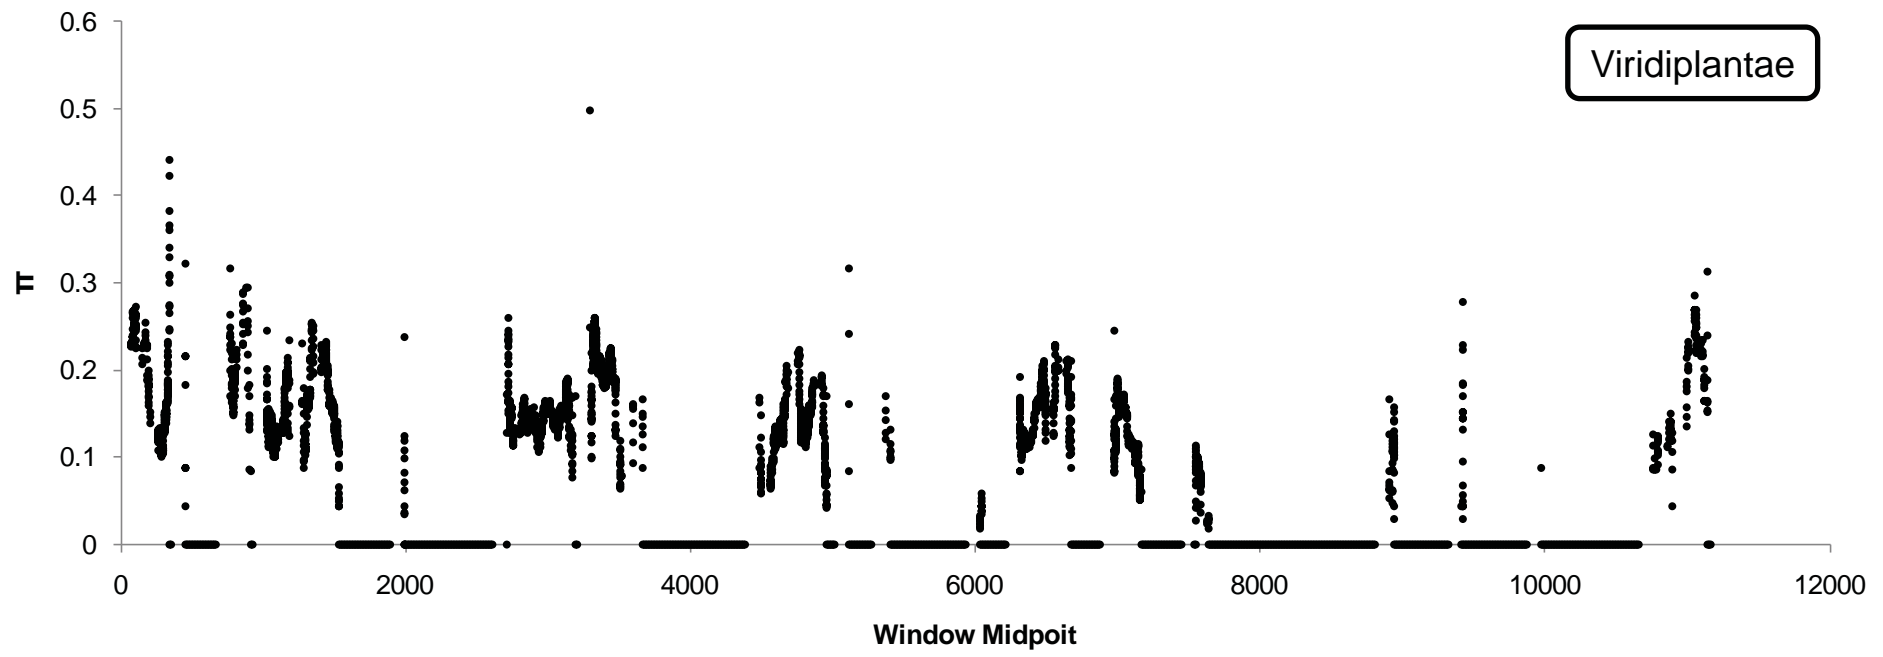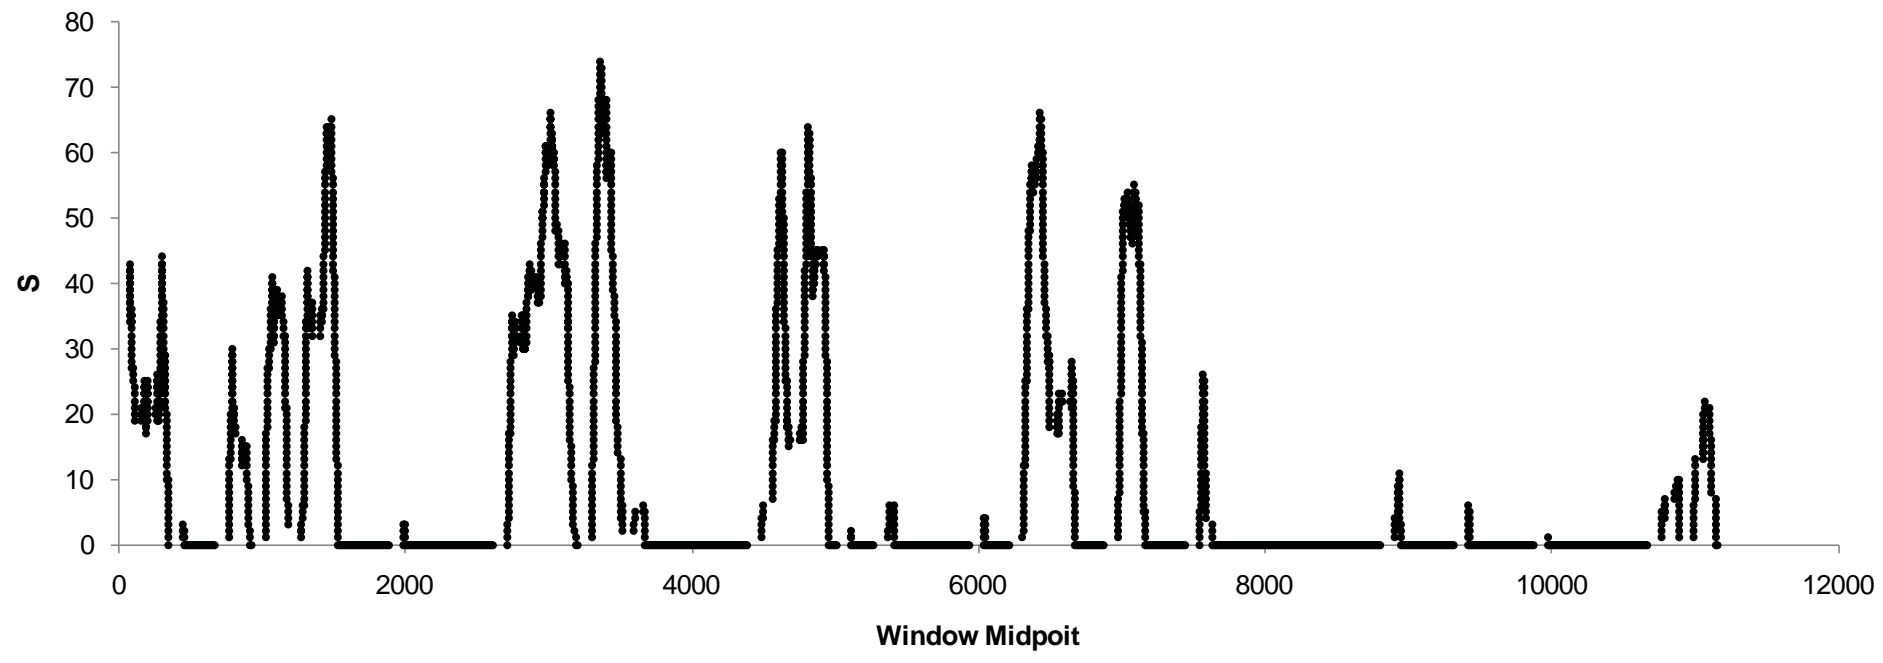



Supplementary Figure S2 (cont.)

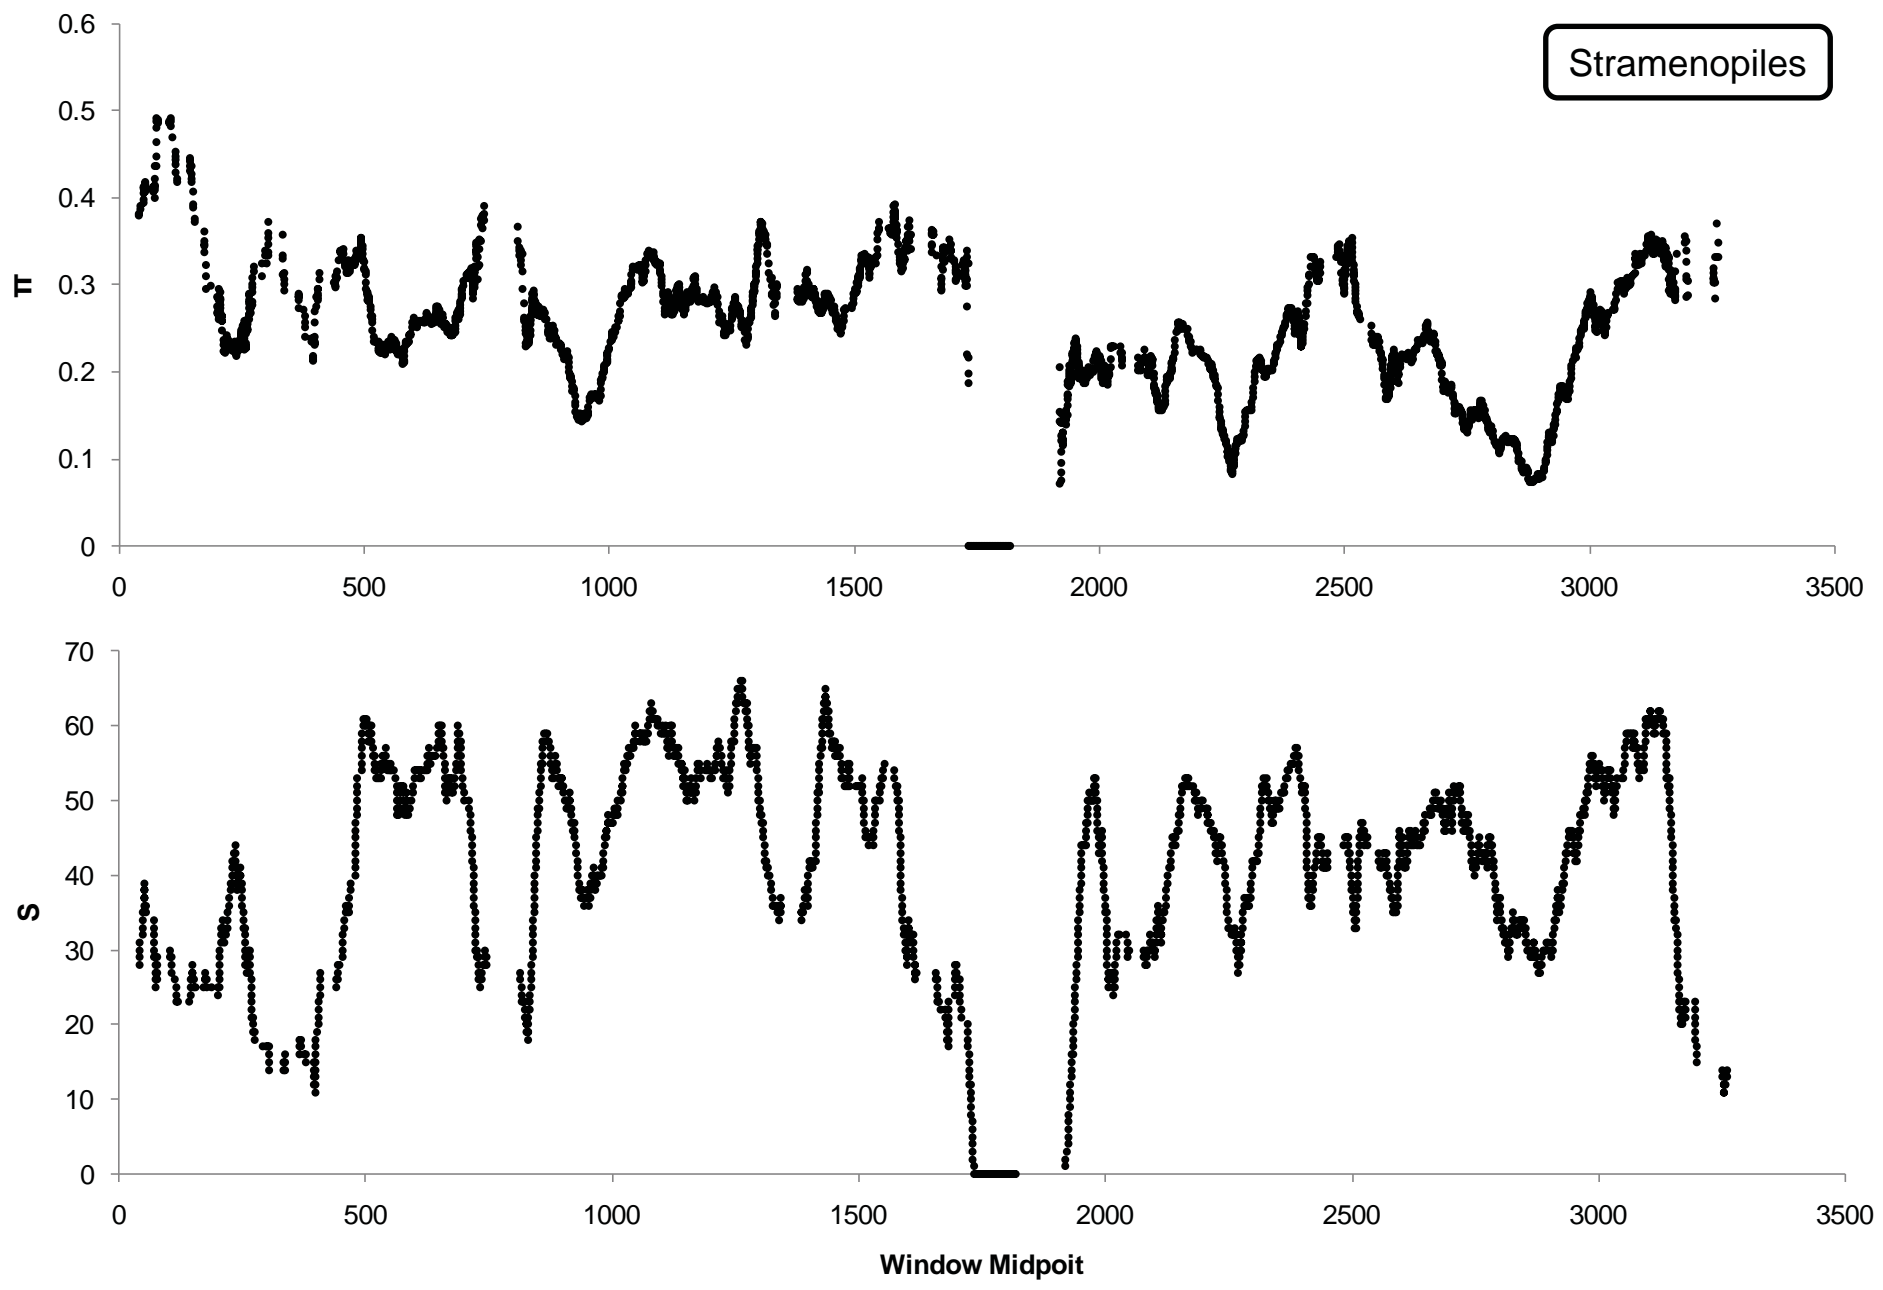

Supplementary Figure S2 (cont.)

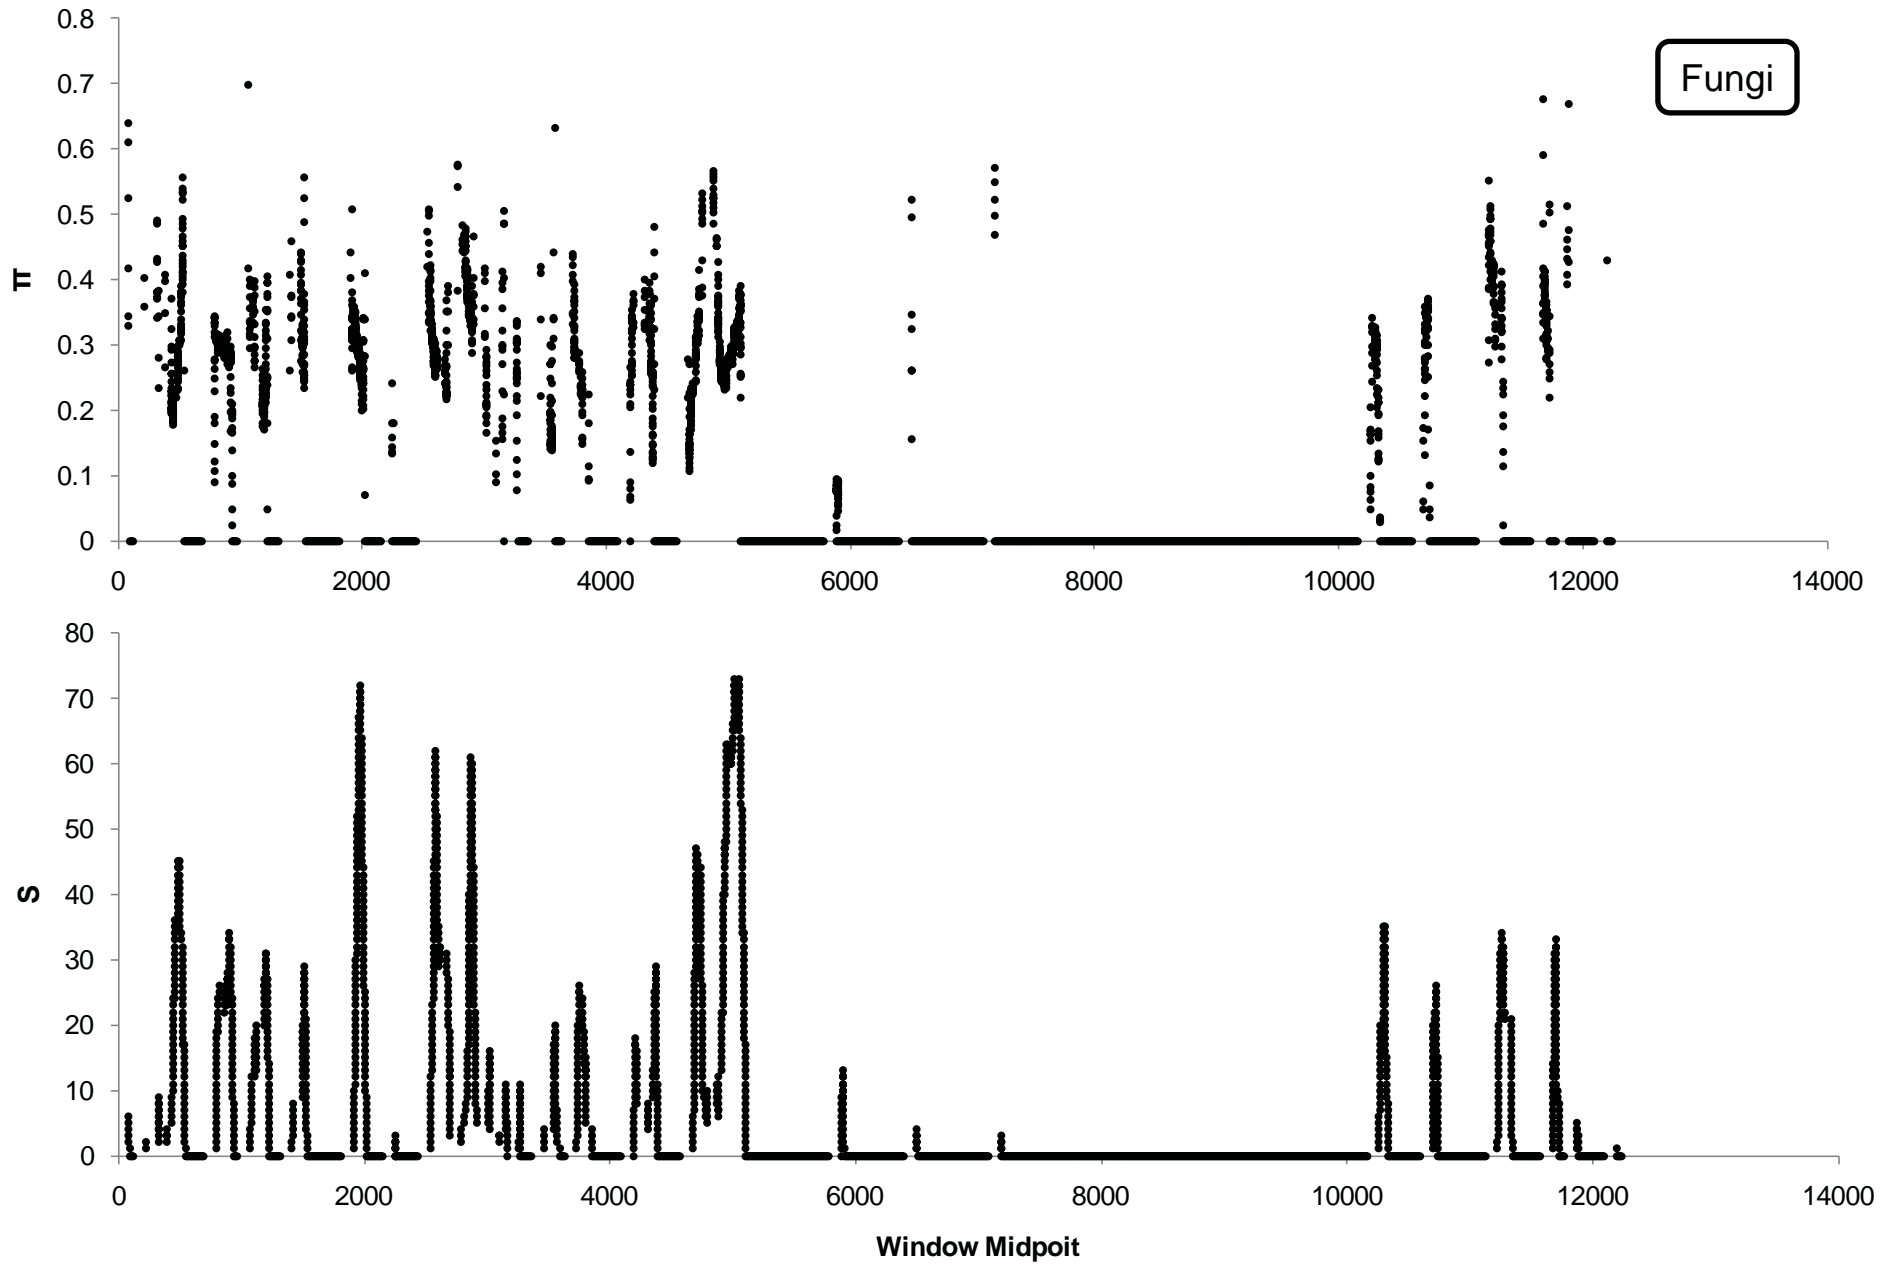

Supplementary Figure S2 (cont.)

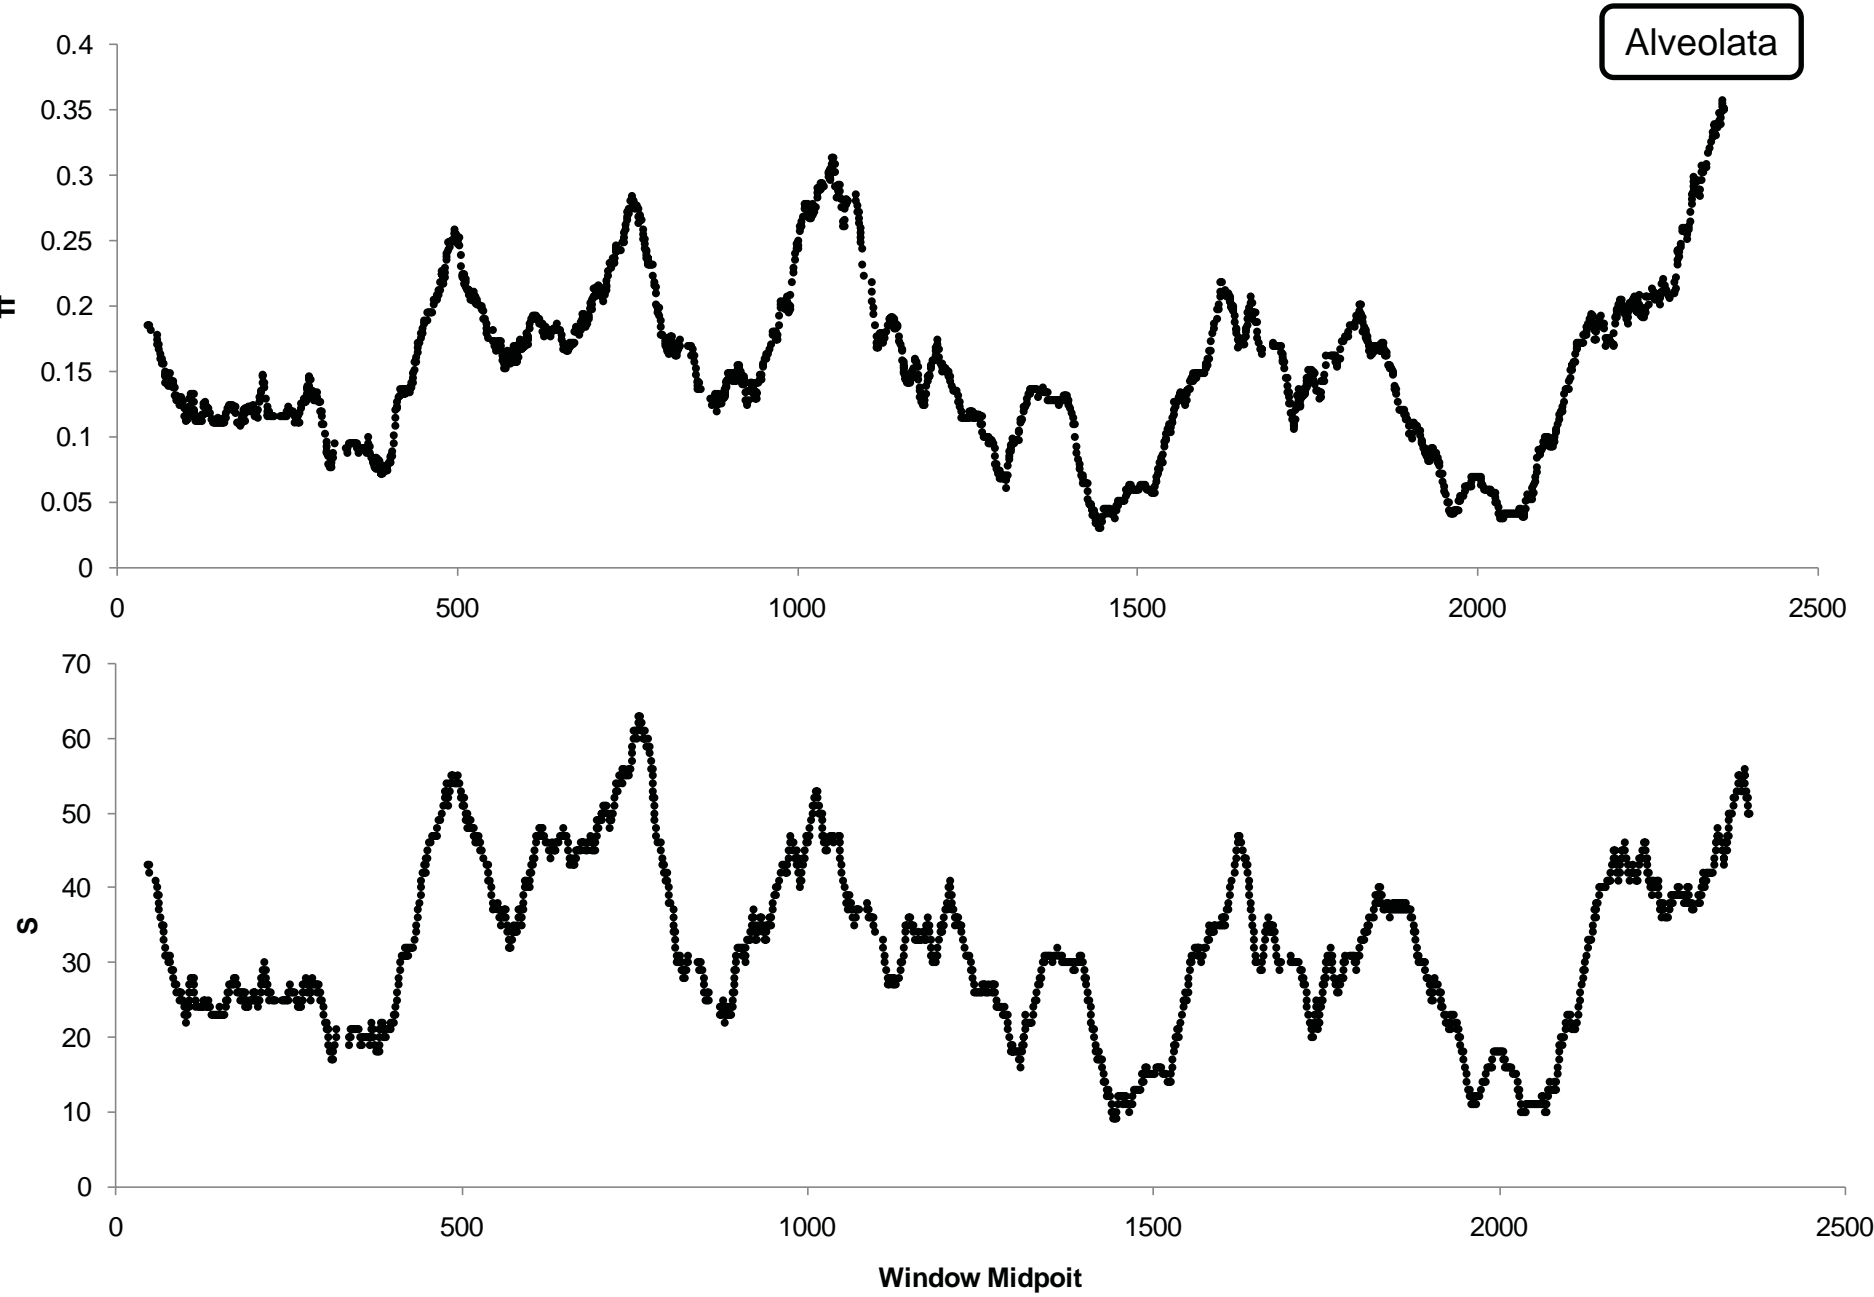

Supplementary Figure S2 (cont.)

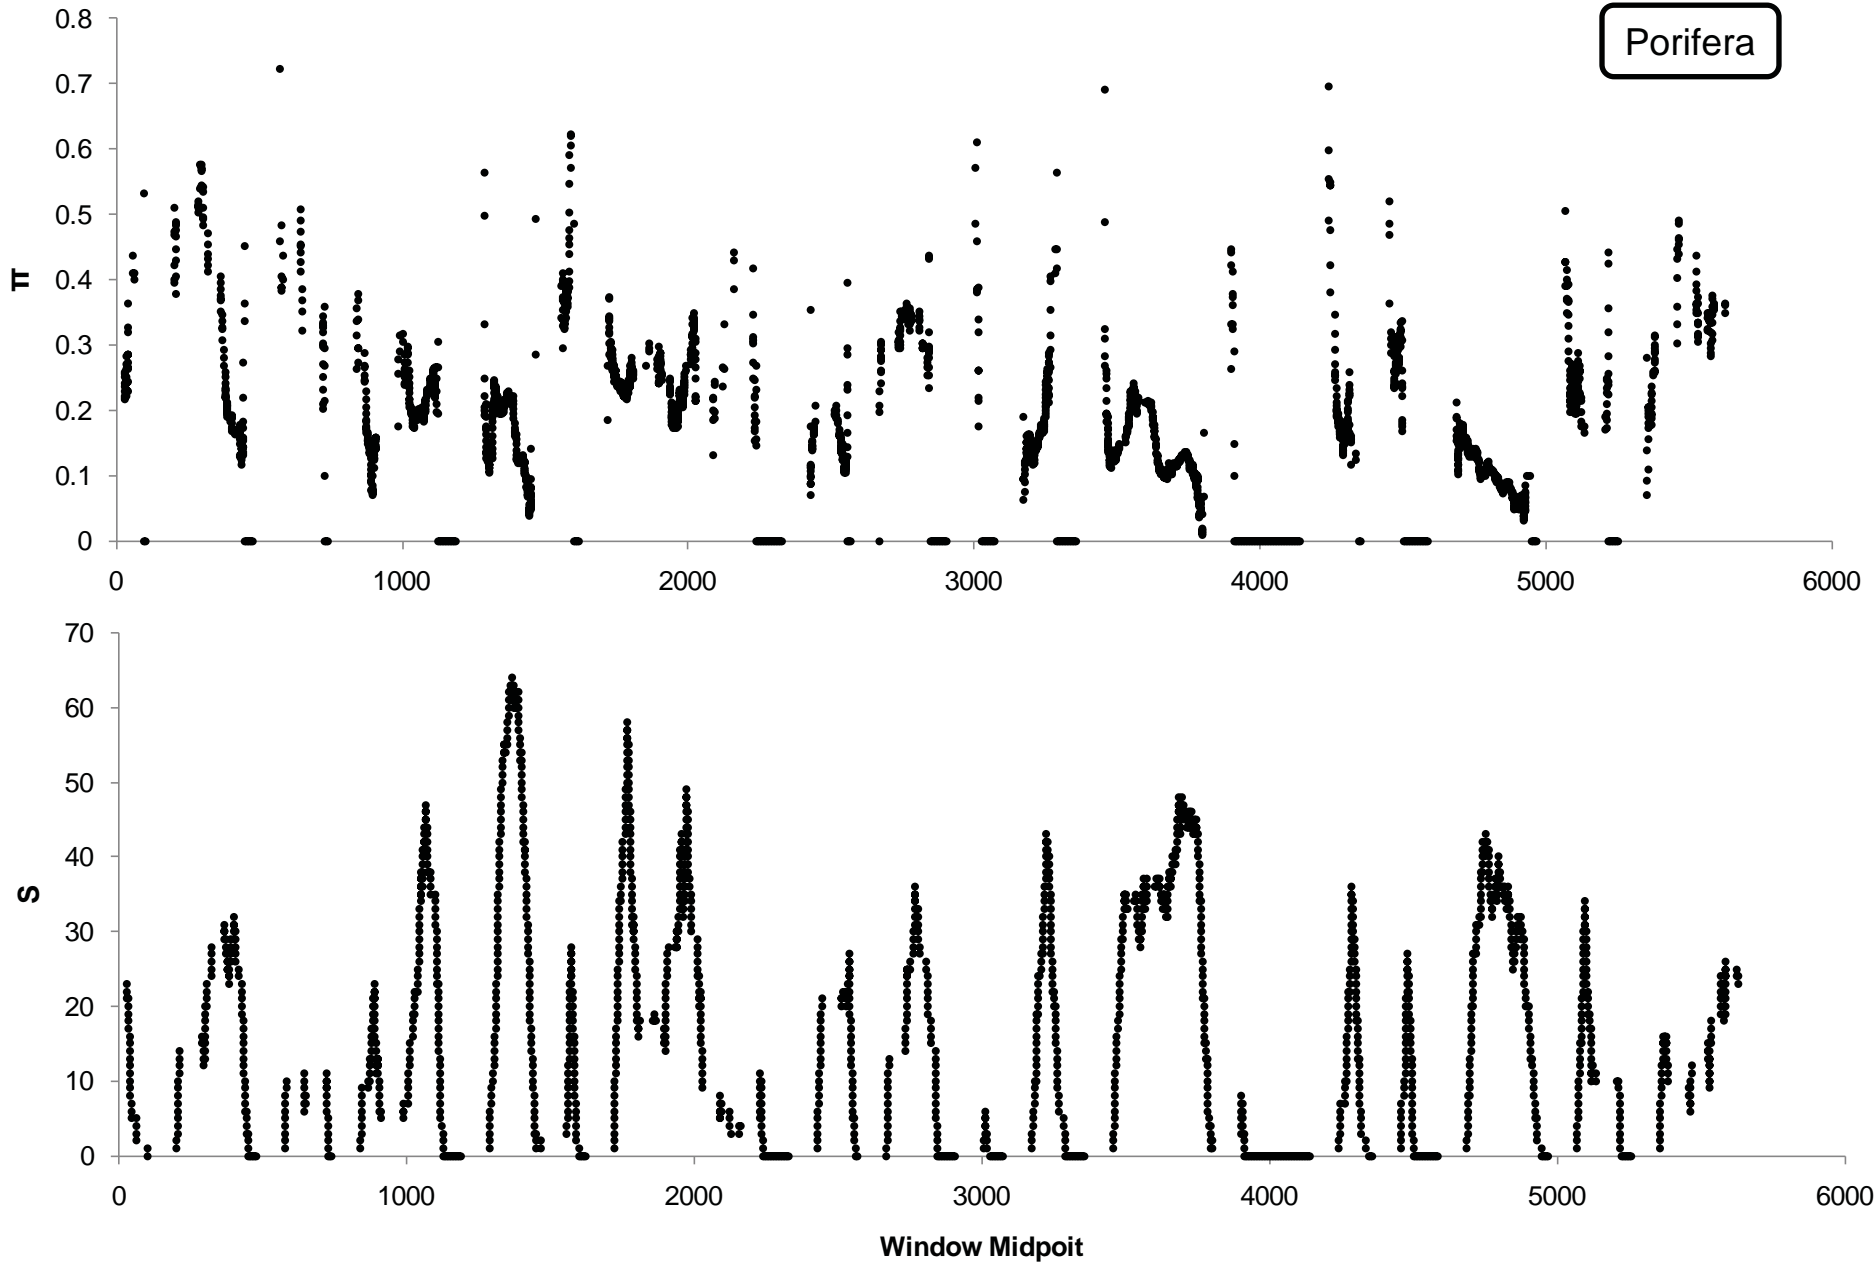

Supplementary Figure S2 (cont.)

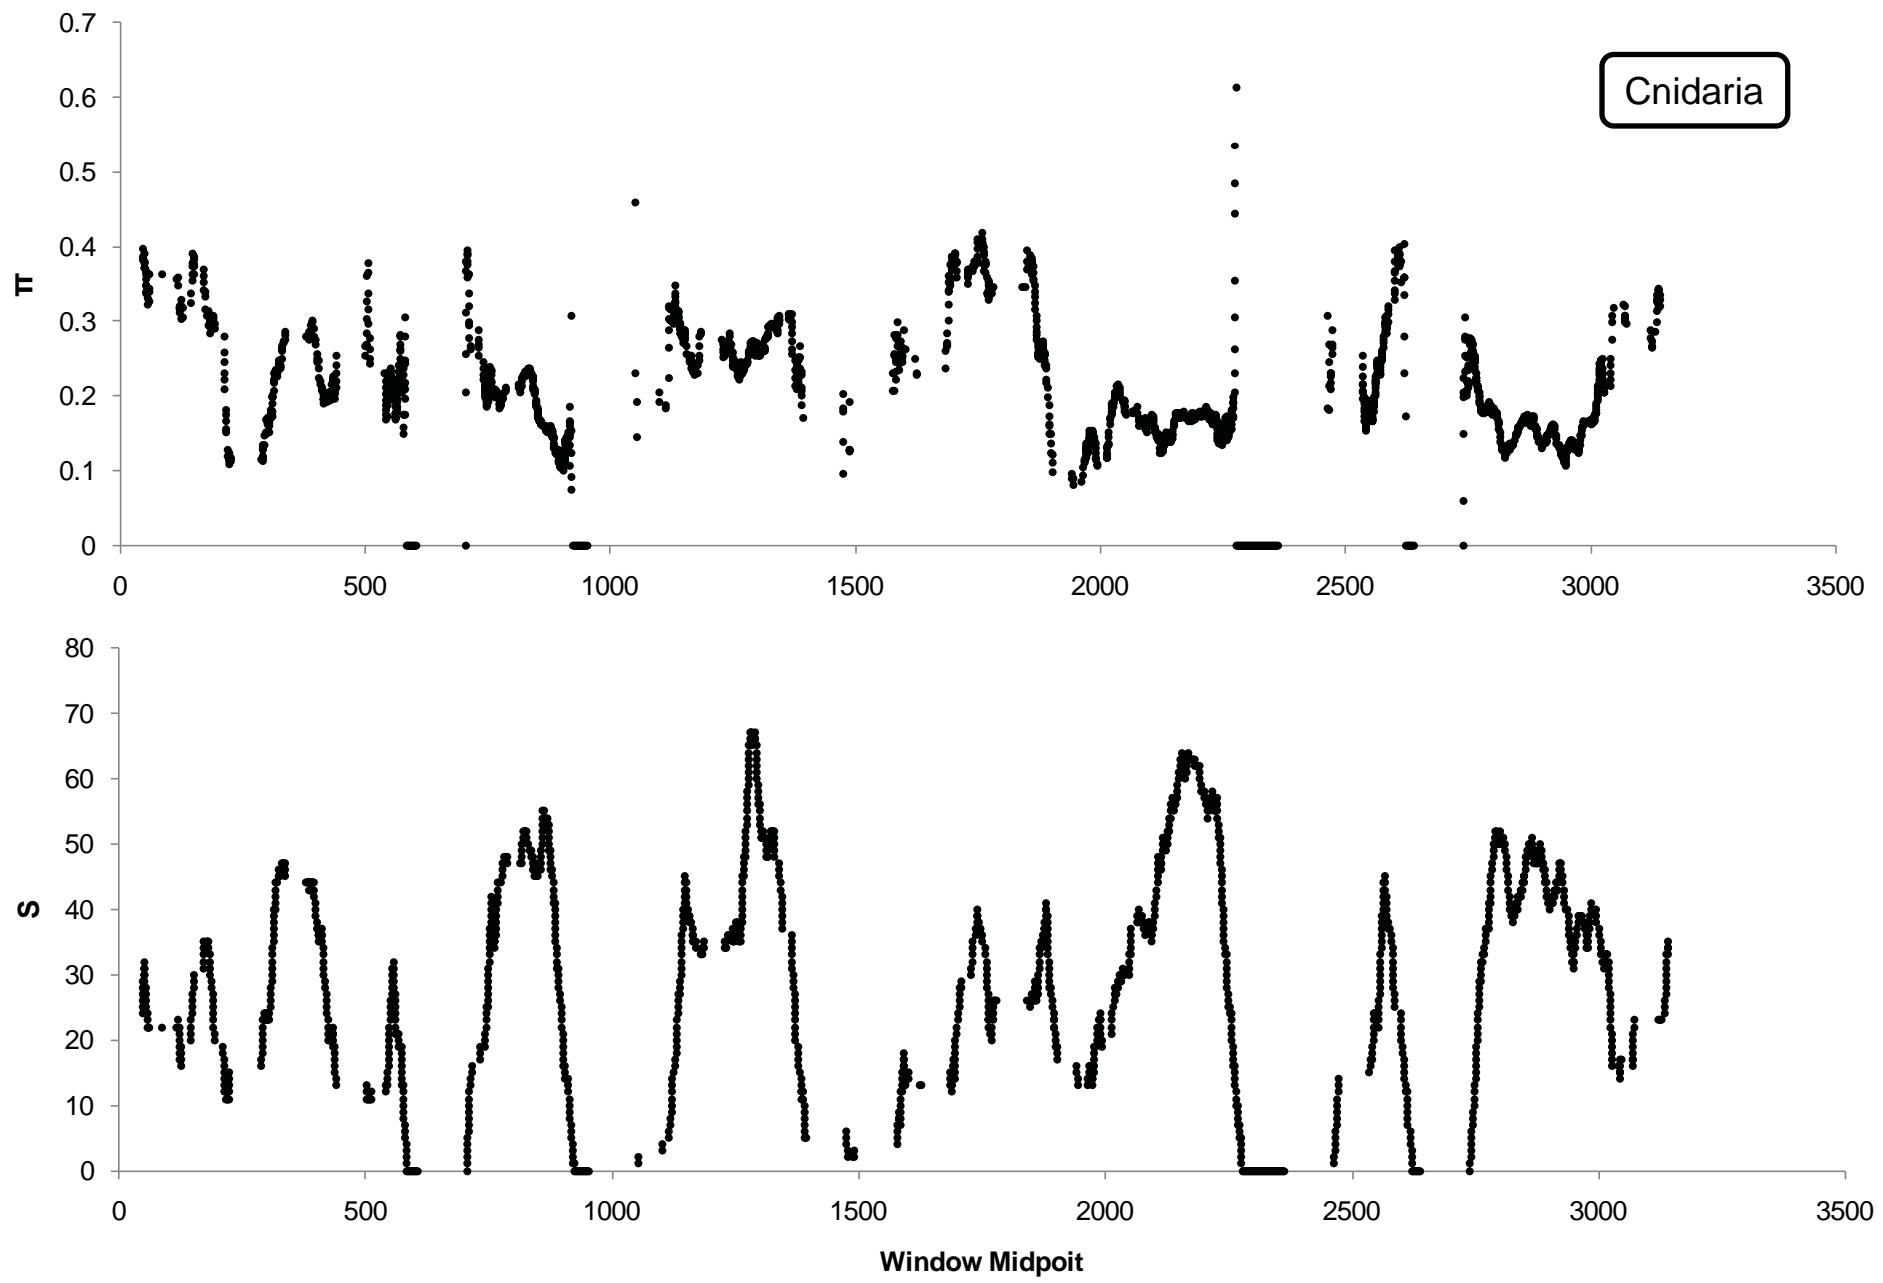

Supplementary Figure S2 (cont.)

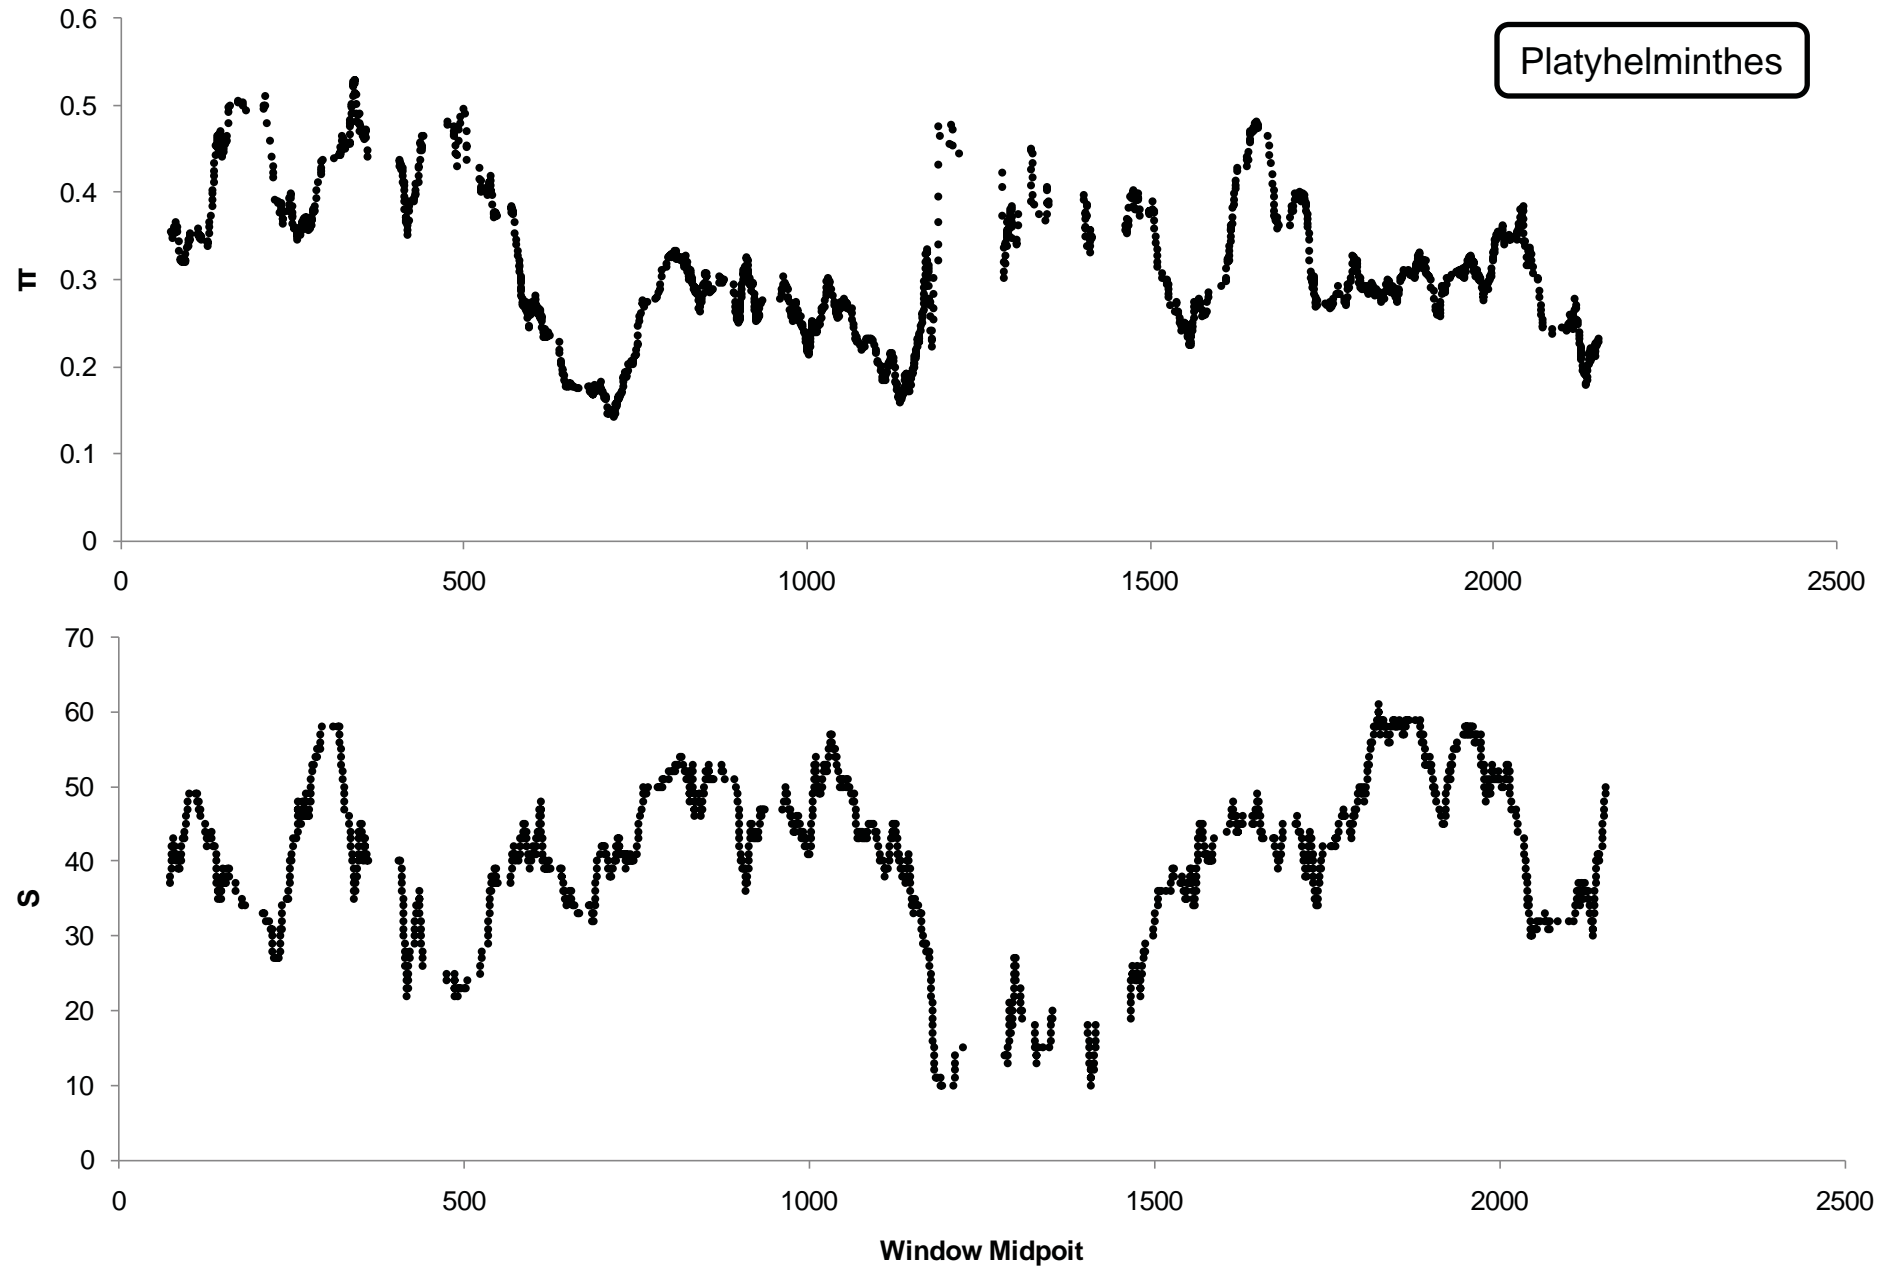

Supplementary Figure S2 (cont.)

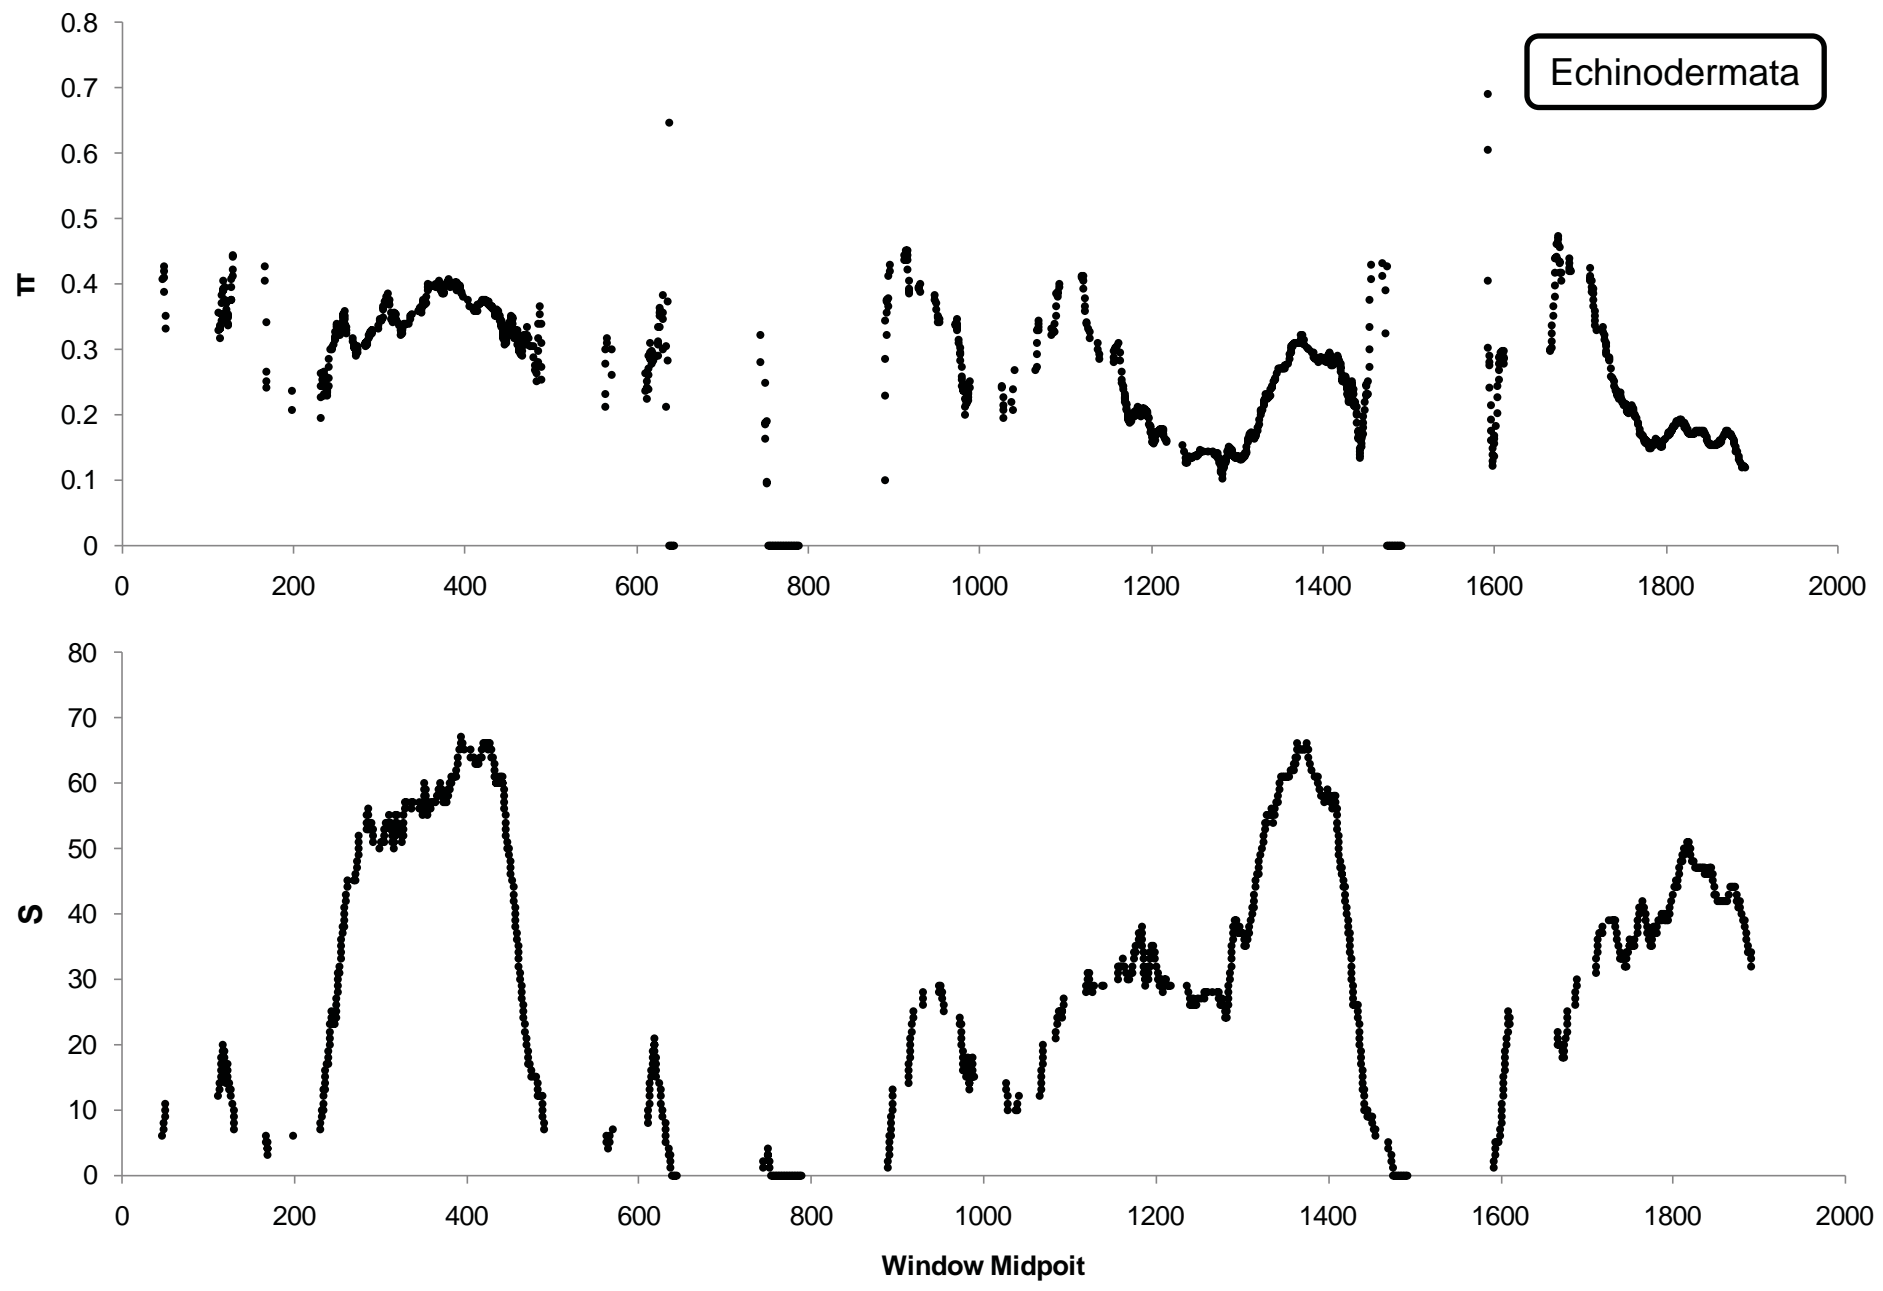

Supplementary Figure S2 (cont.)

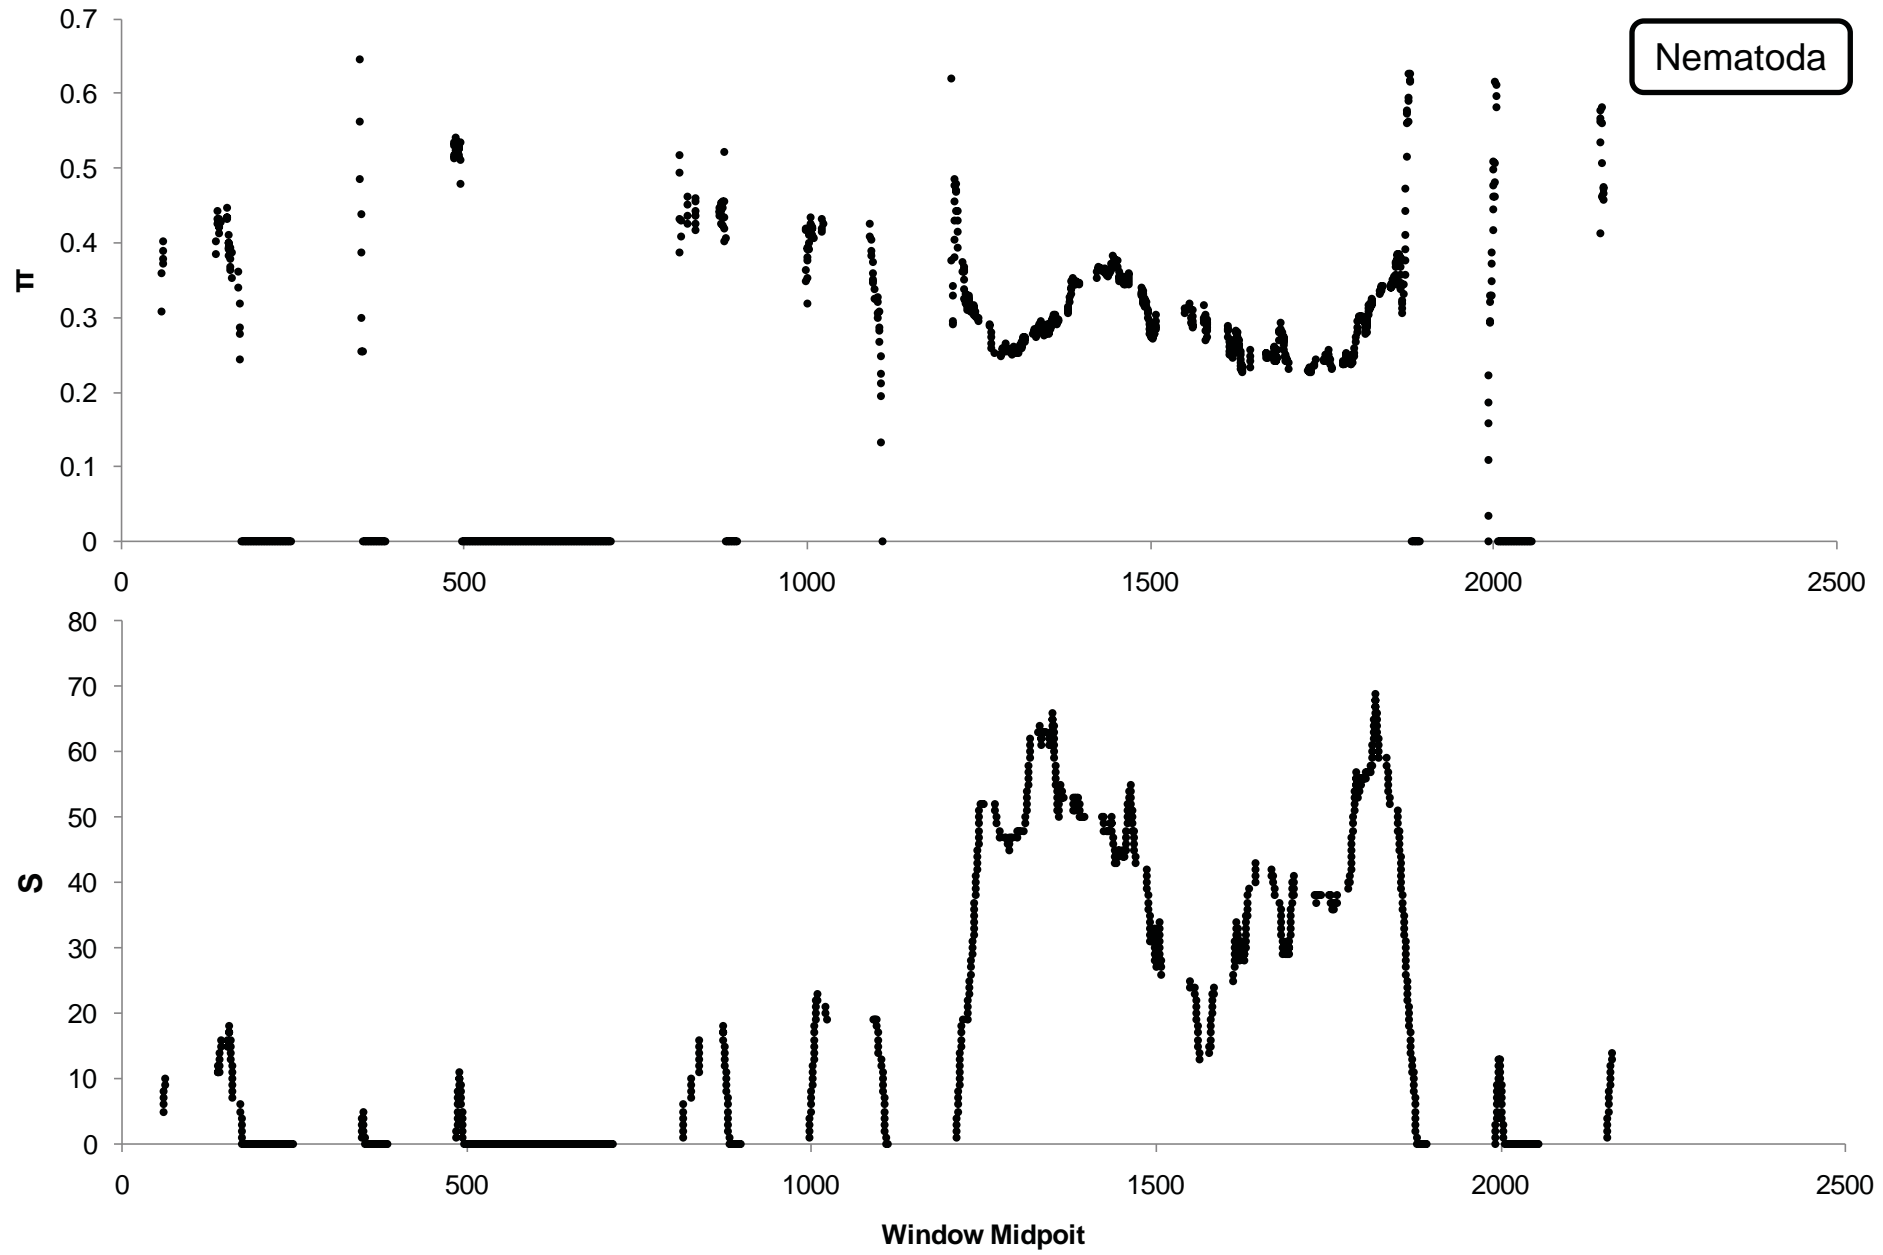



Supplementary Figure S2 (cont.)

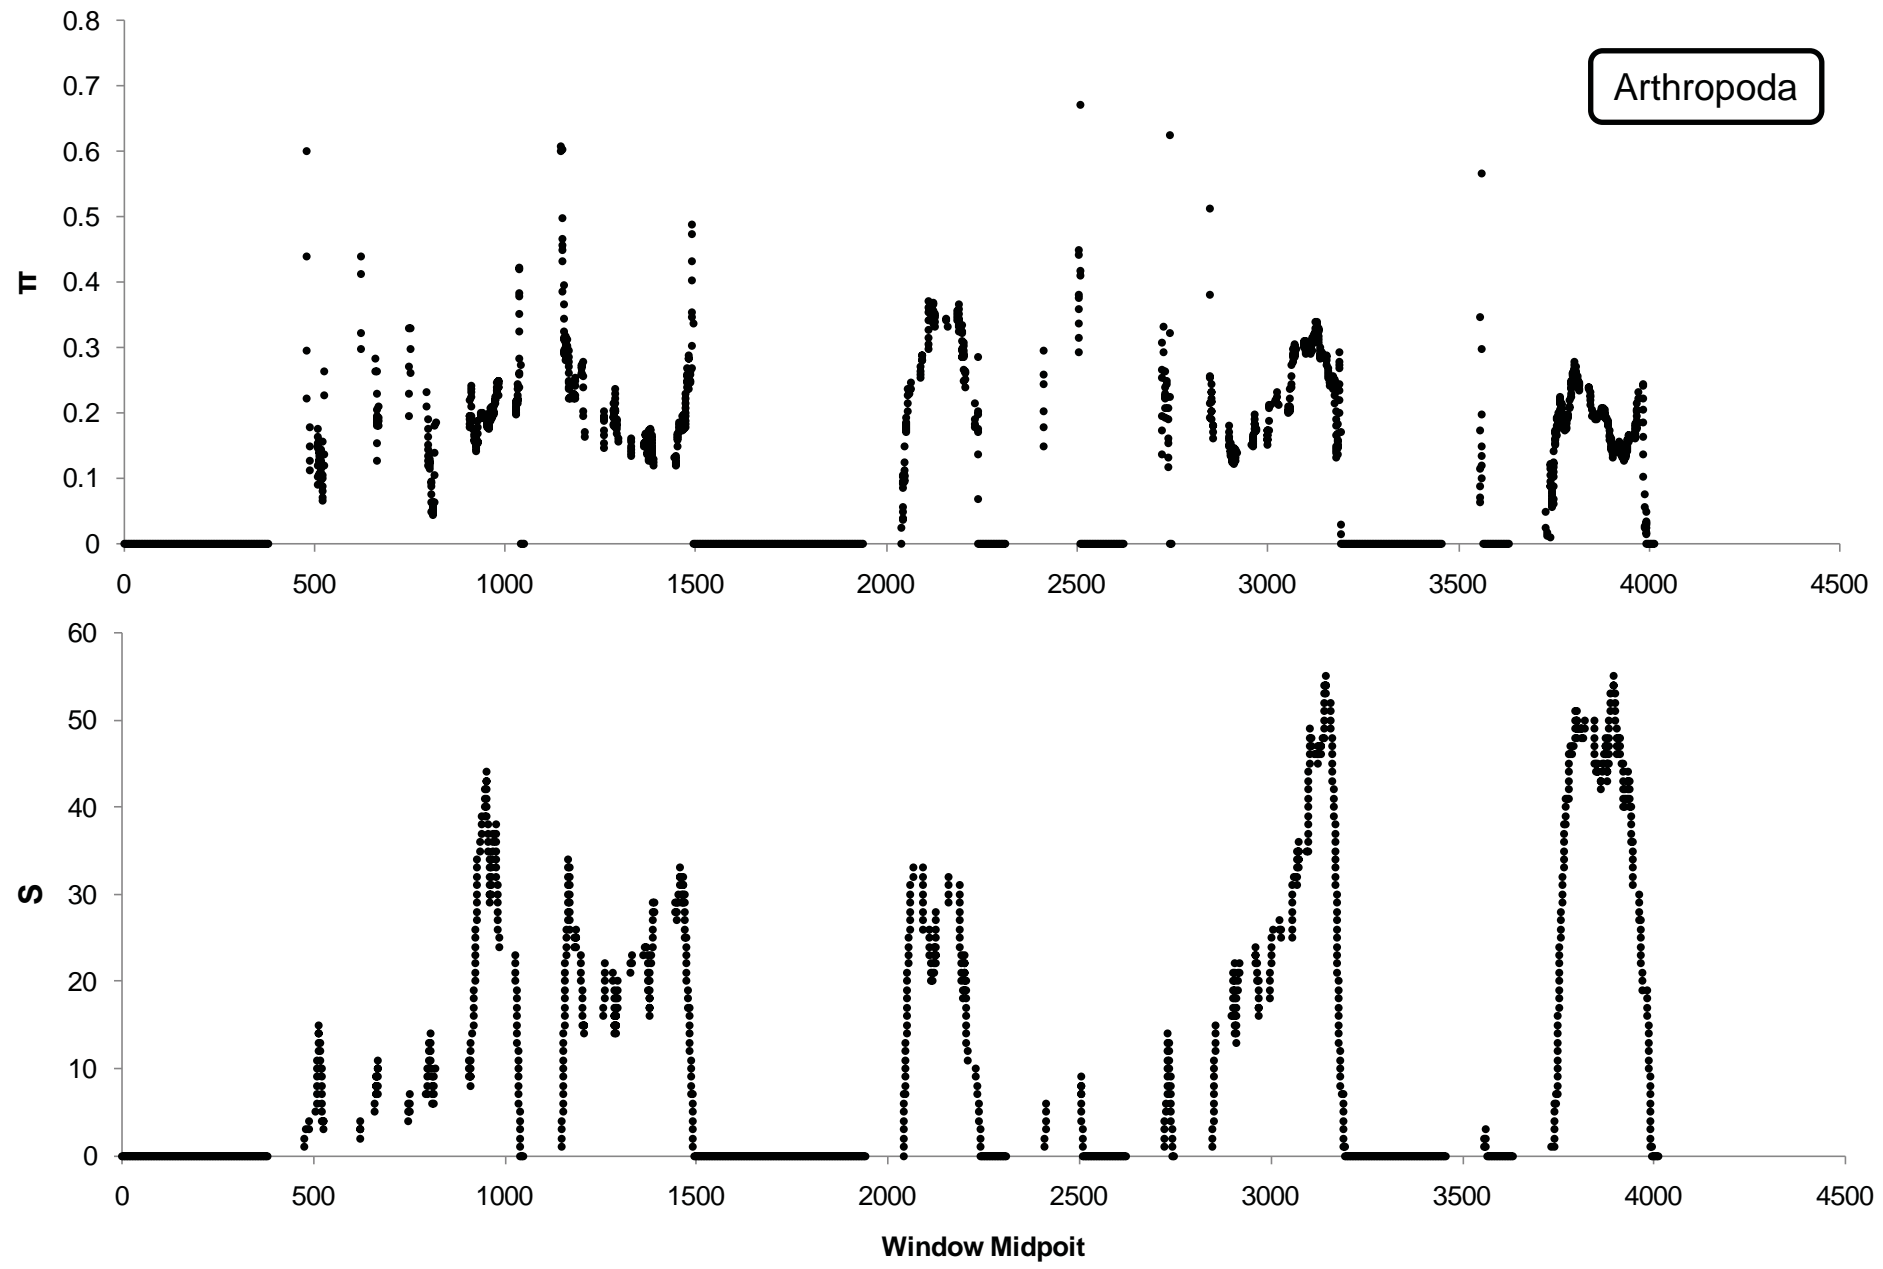

Supplementary Figure S2 (cont.)

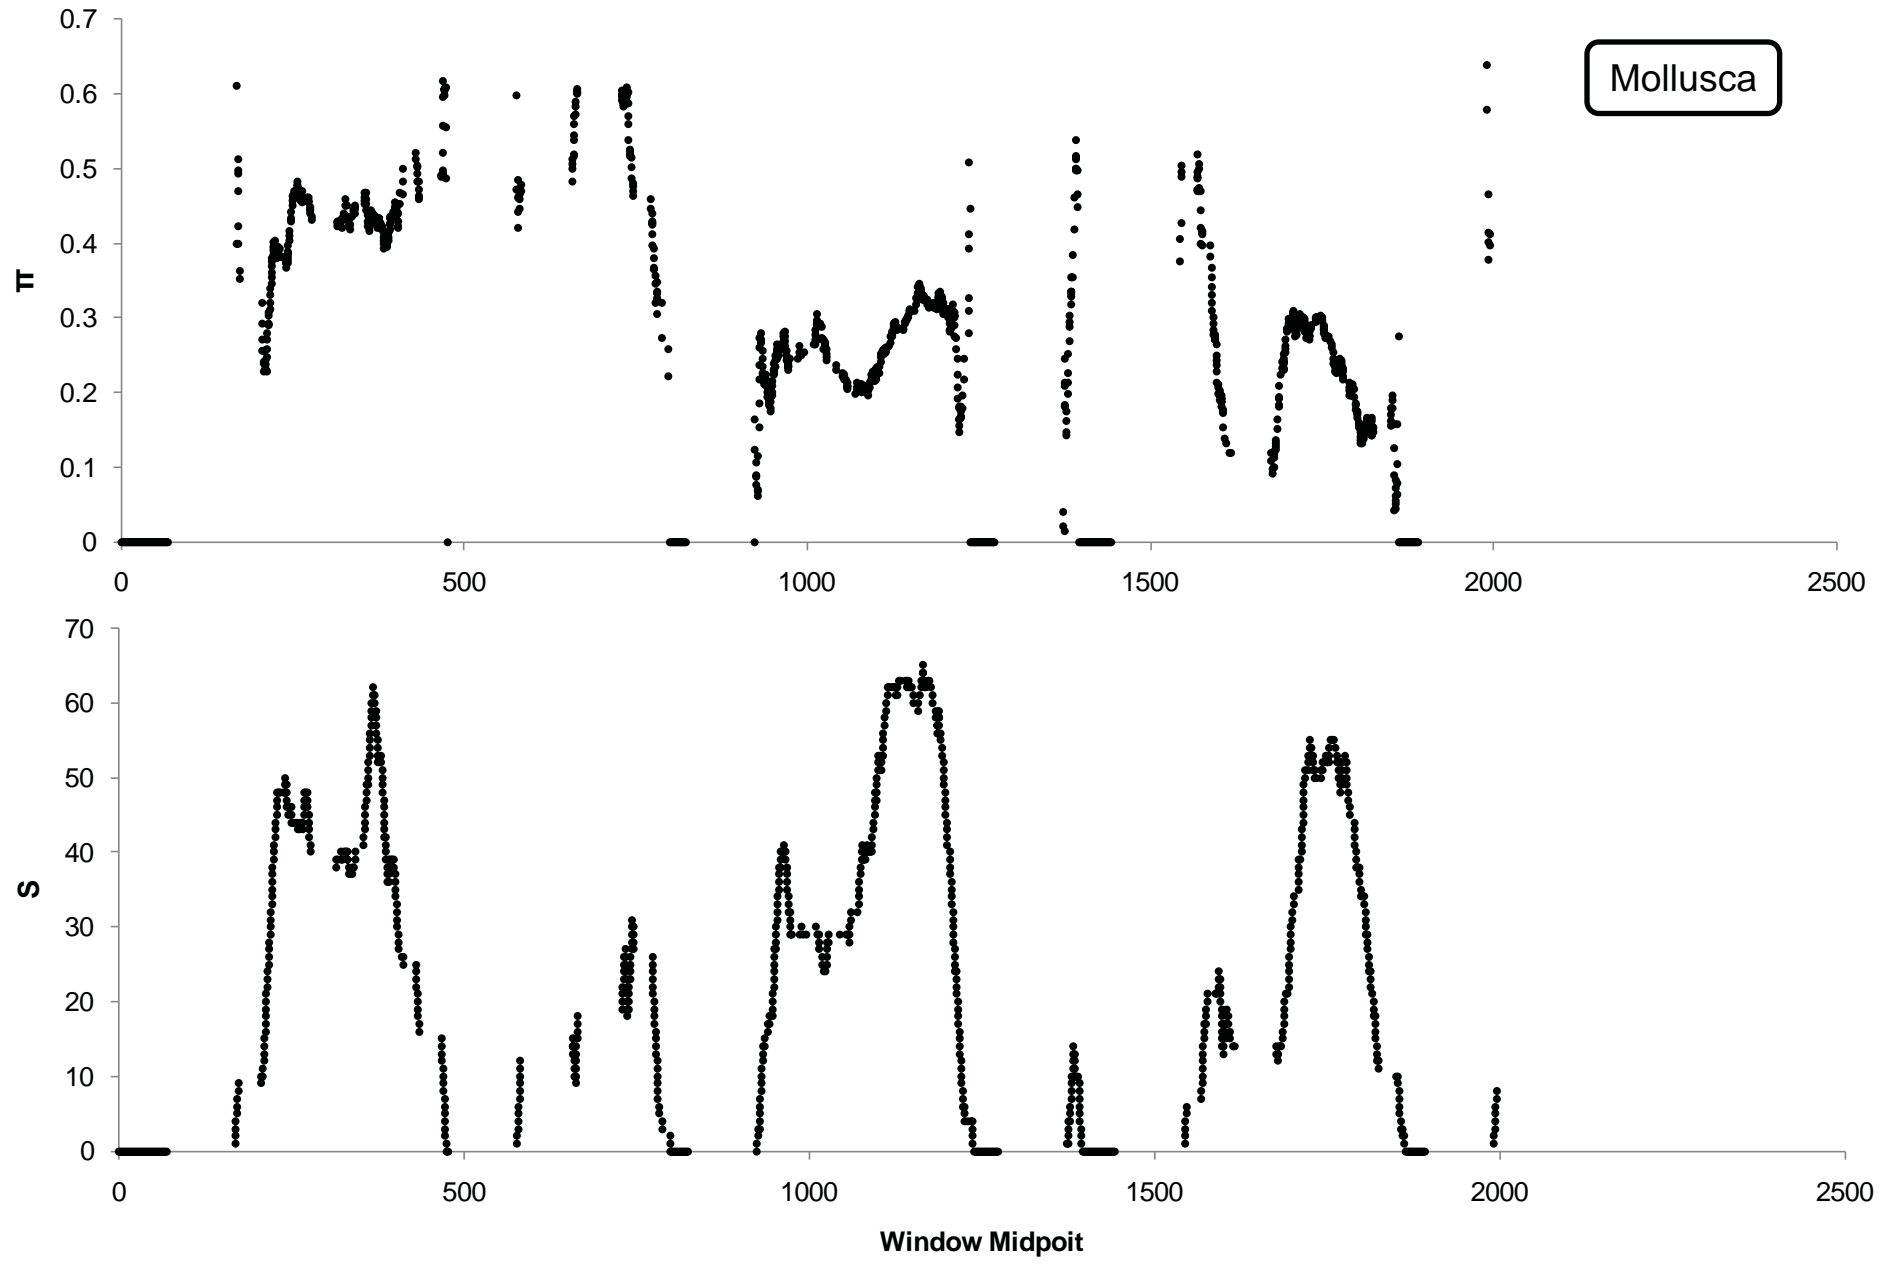

Supplementary Figure S2 (cont.)

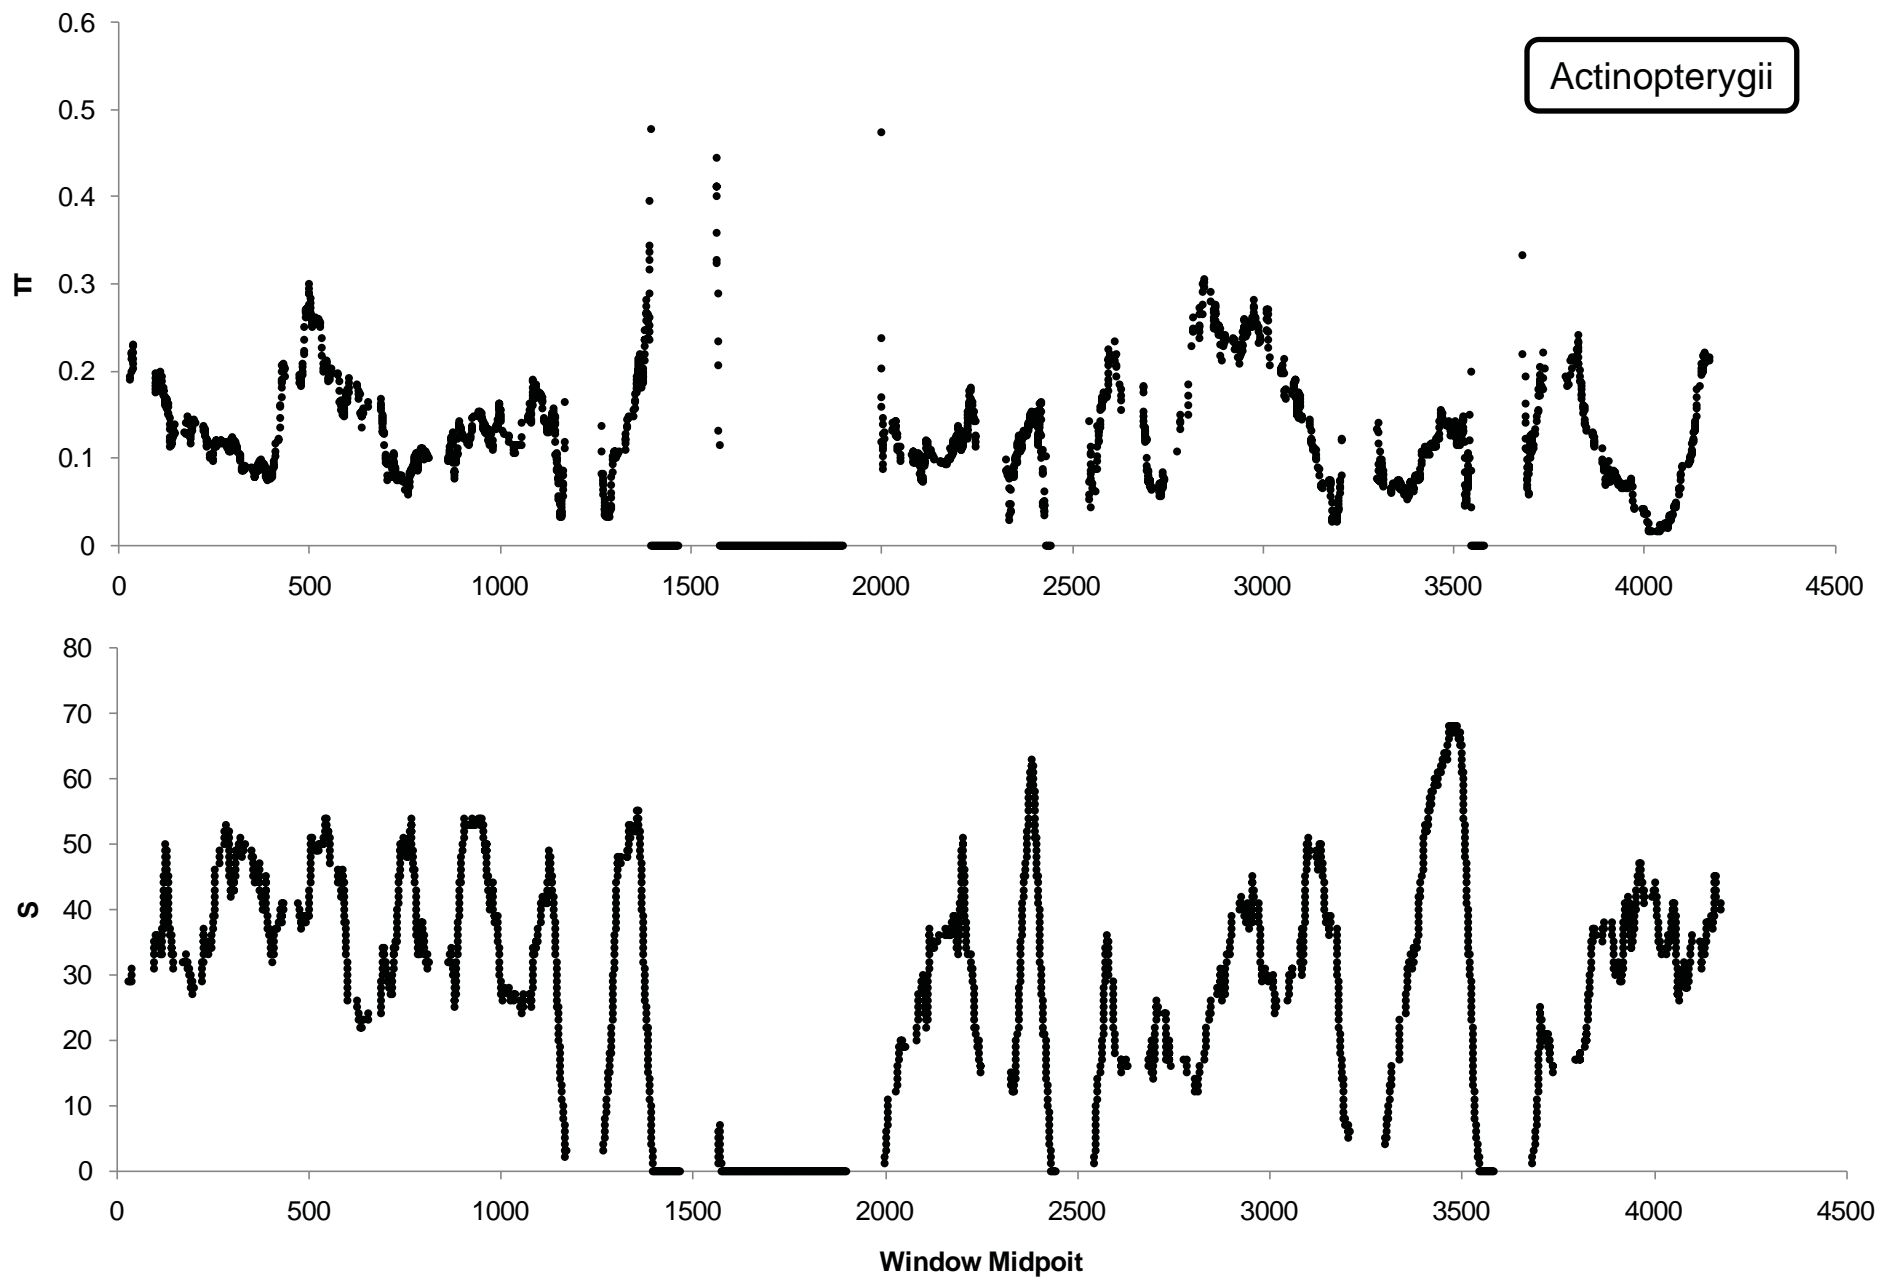

Supplementary Figure S2 (cont.)

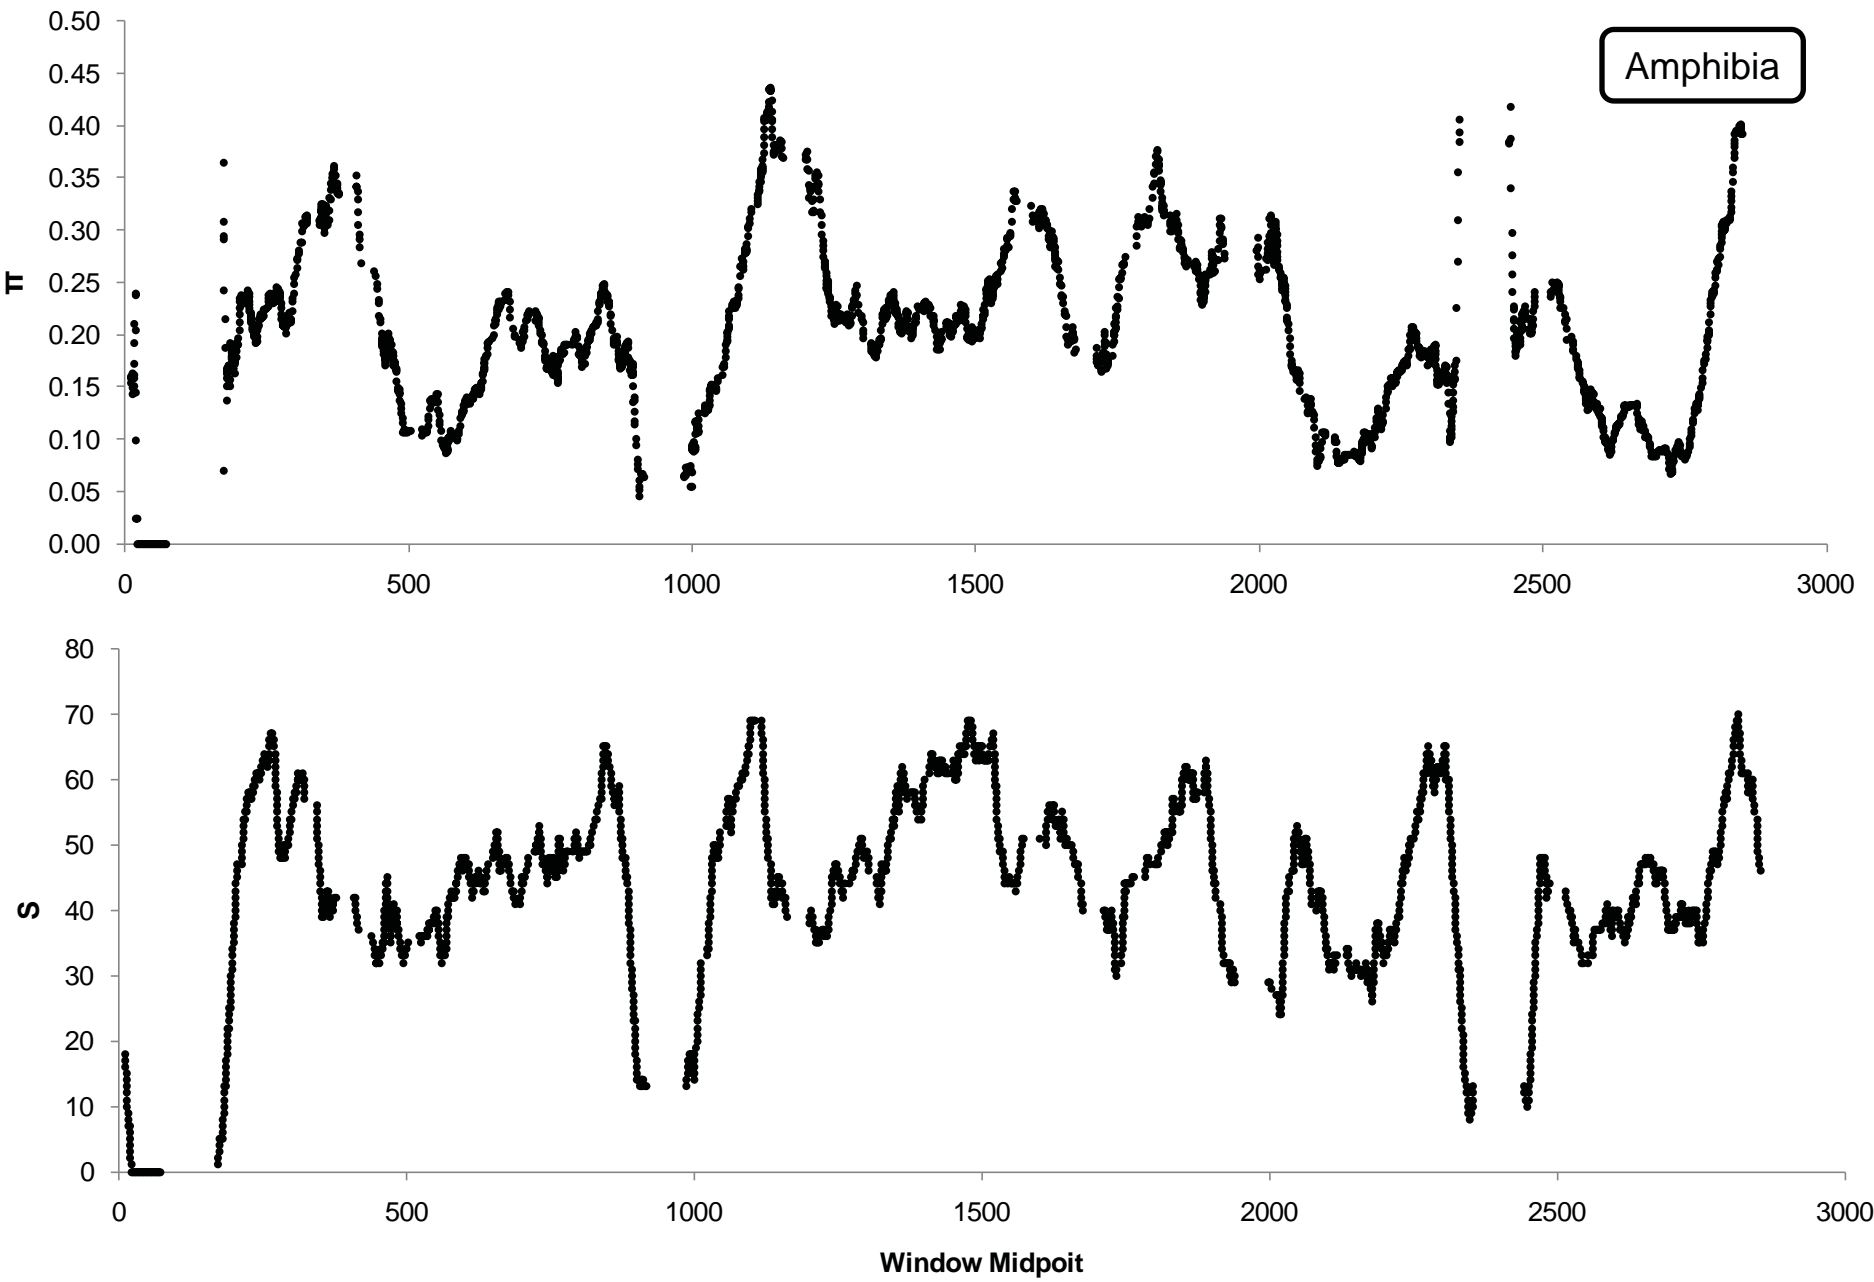

Supplementary Figure S2 (cont.)

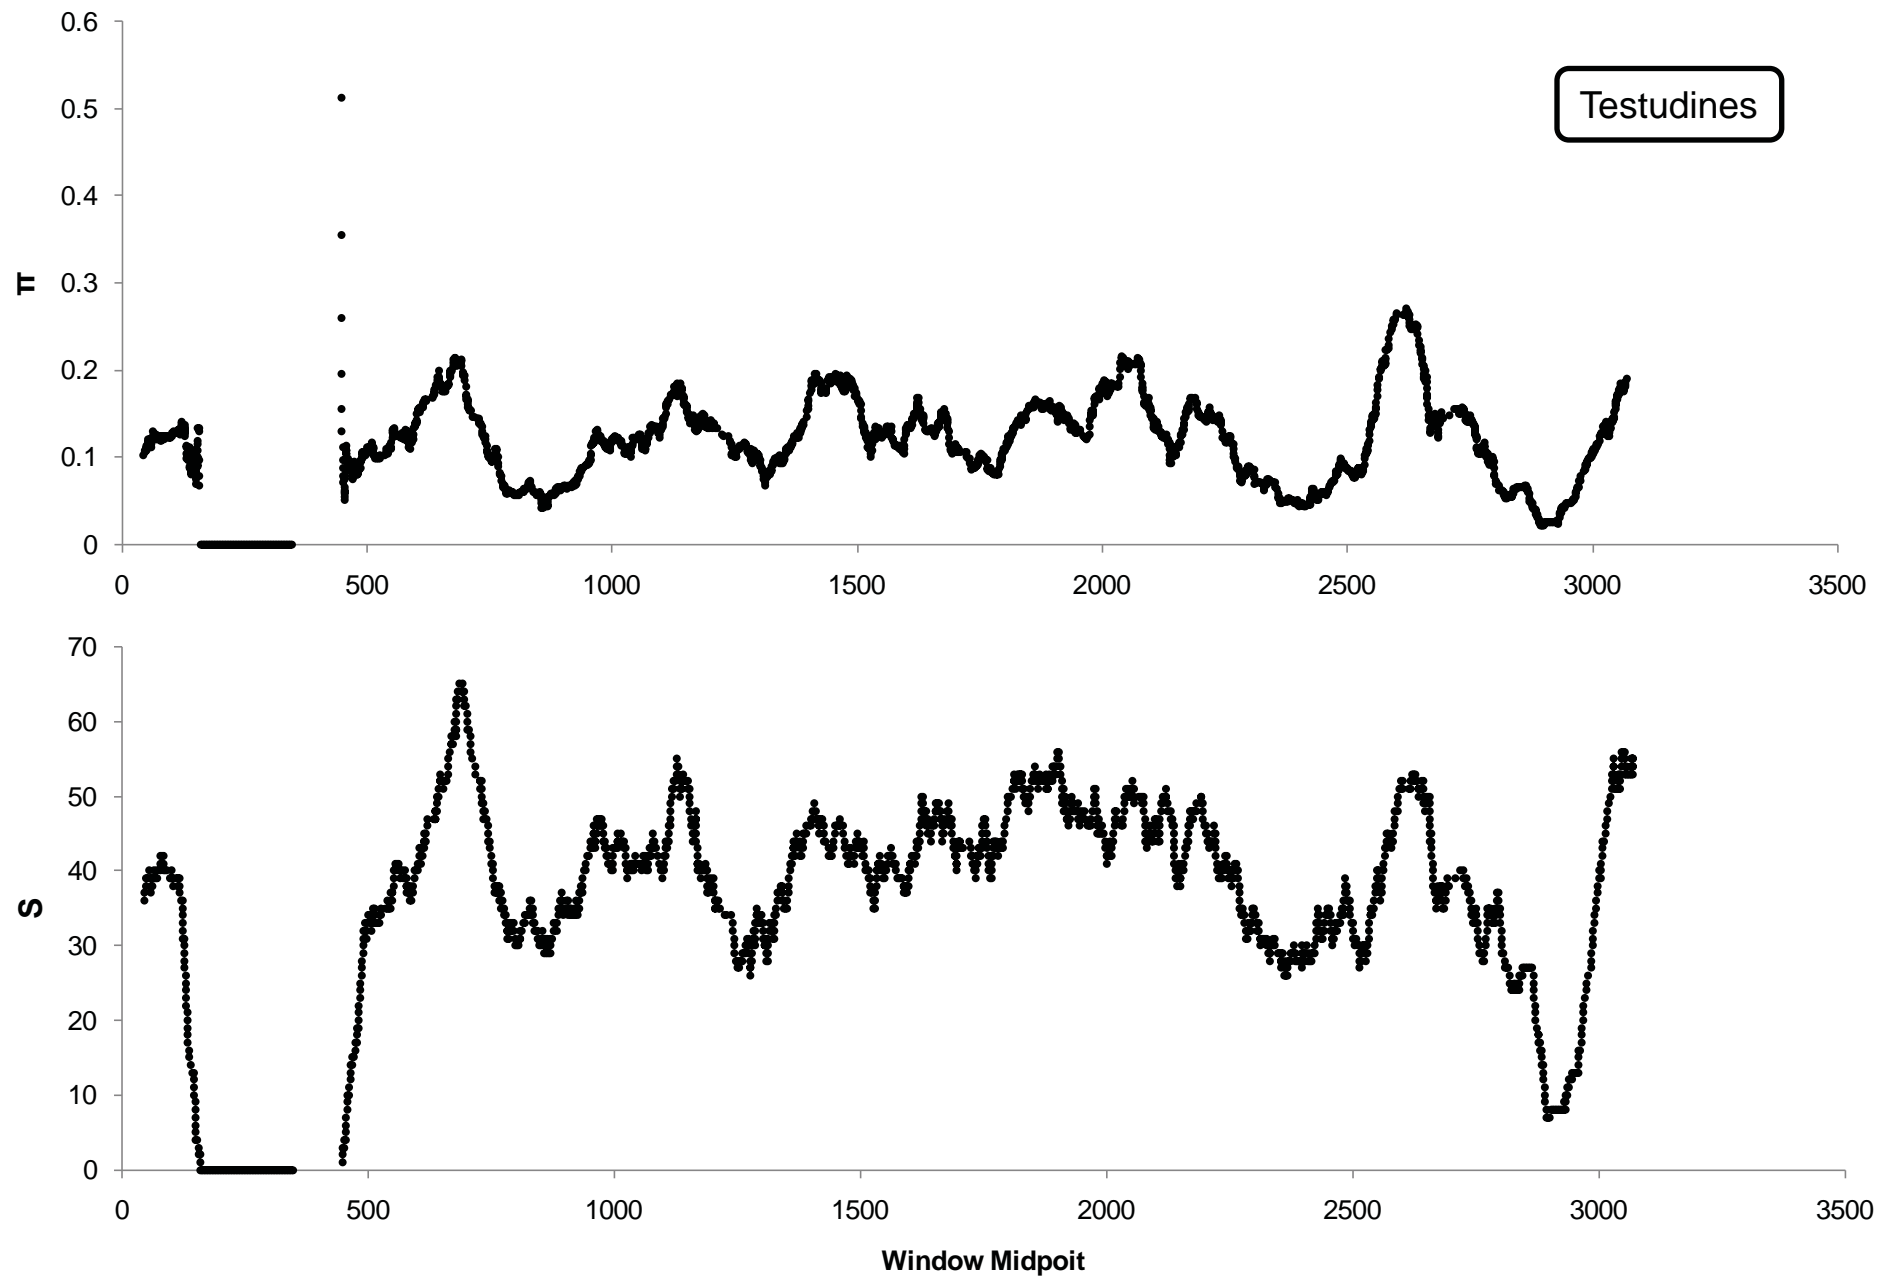

Supplementary Figure S2 (cont.)

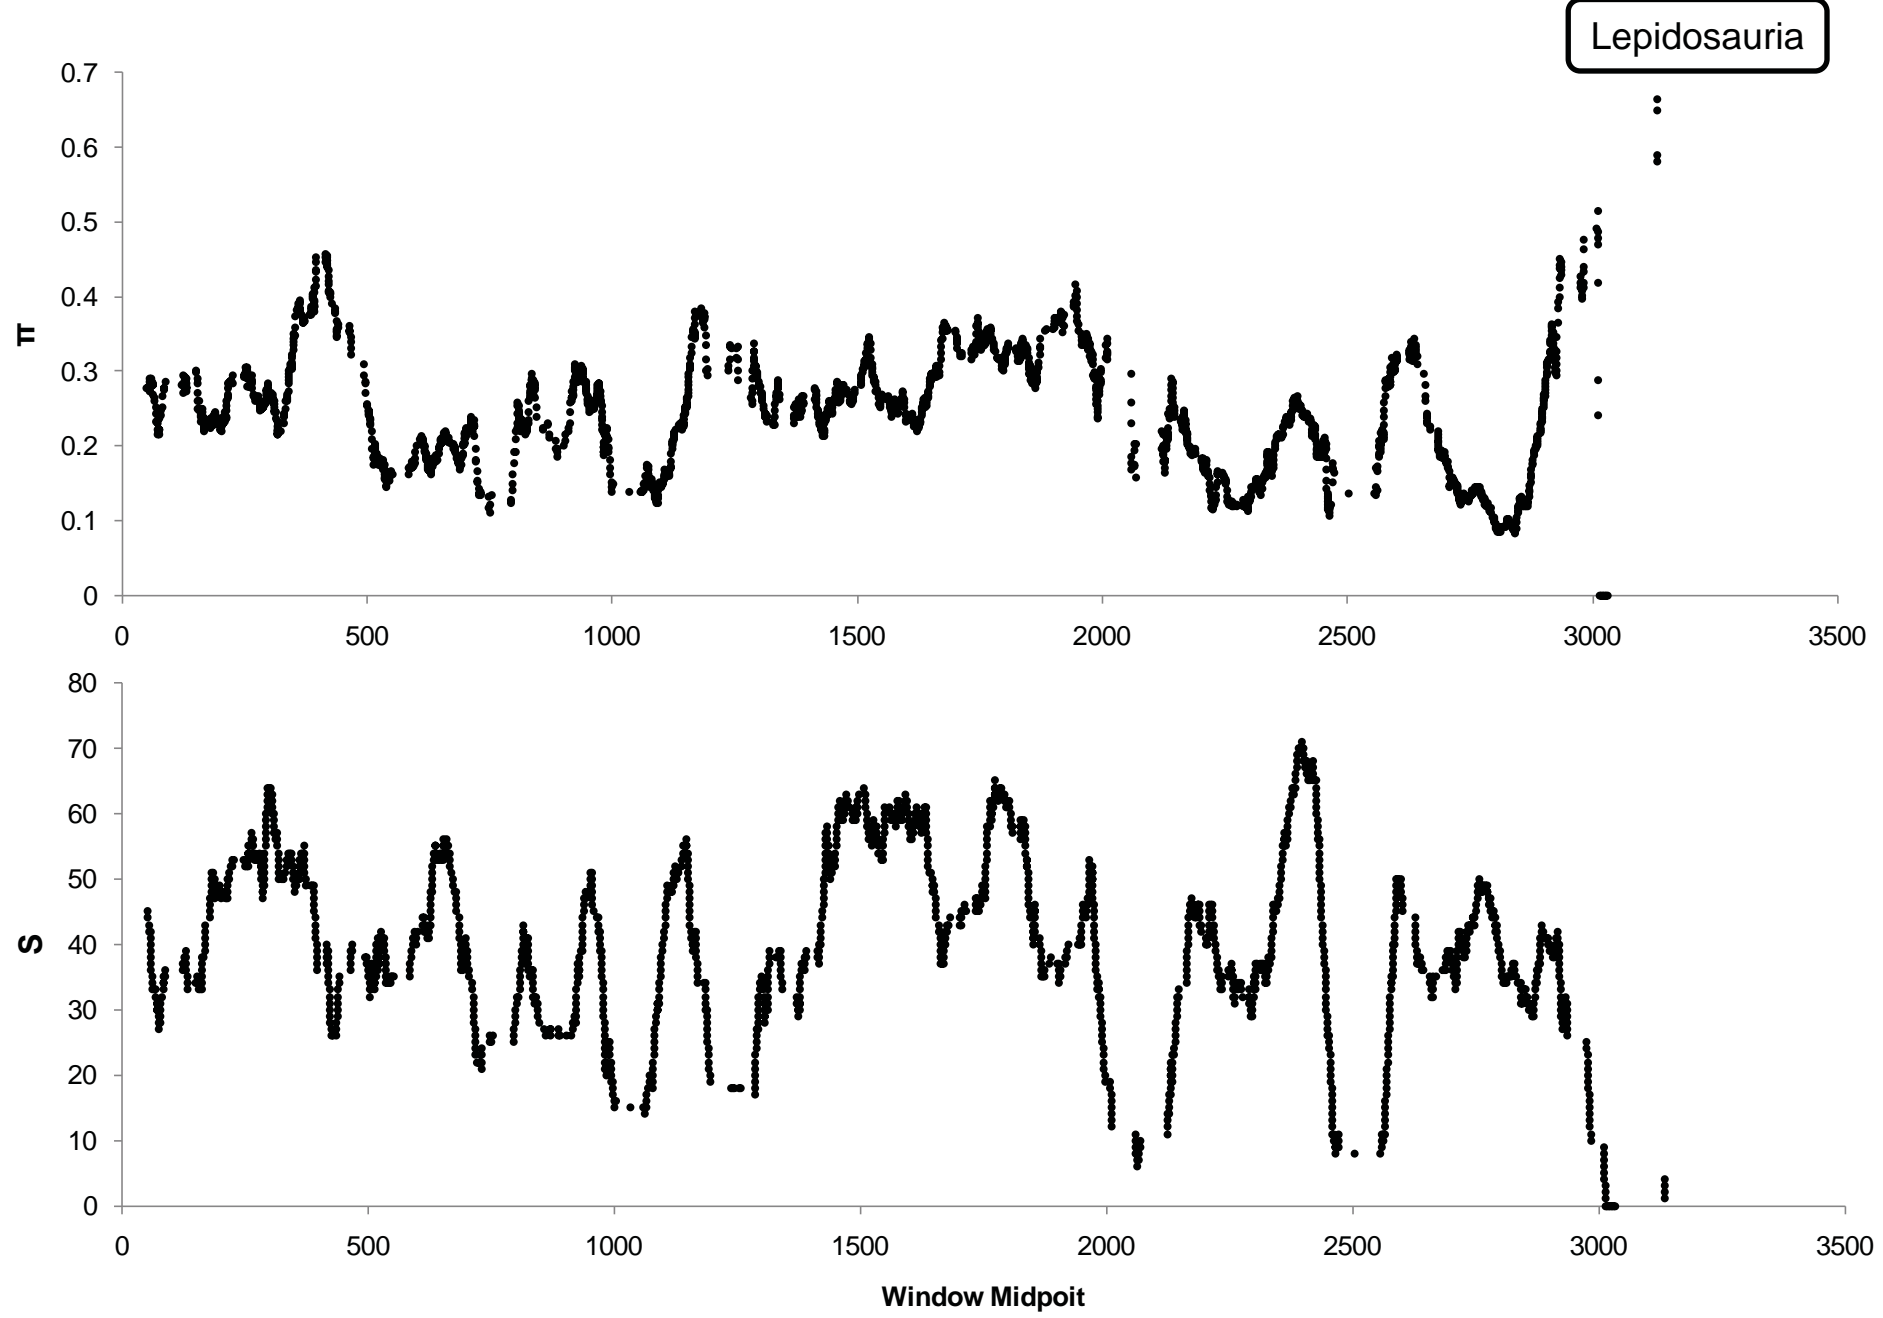

Supplementary Figure S2 (cont.)

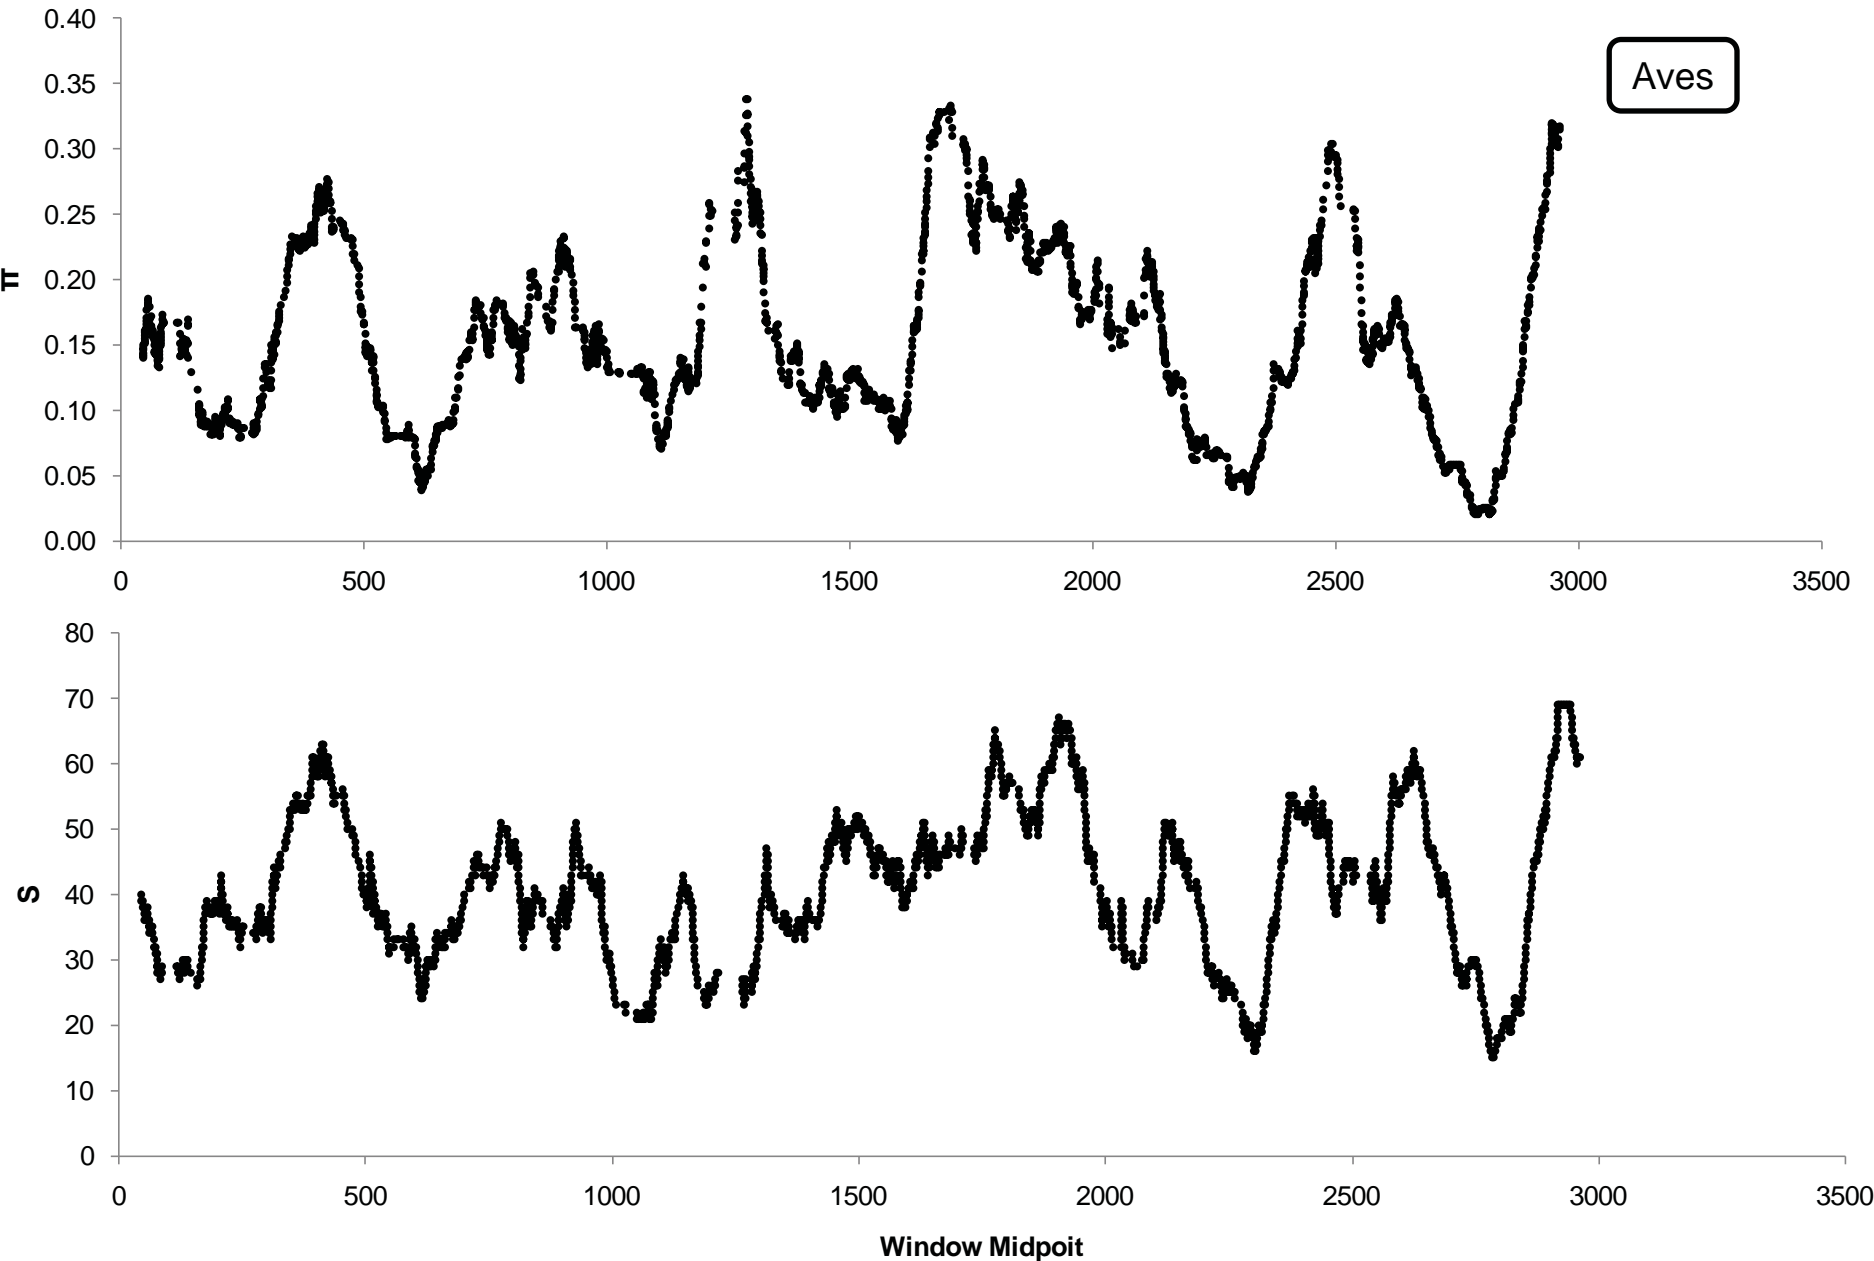

Supplementary Figure S2 (cont.)

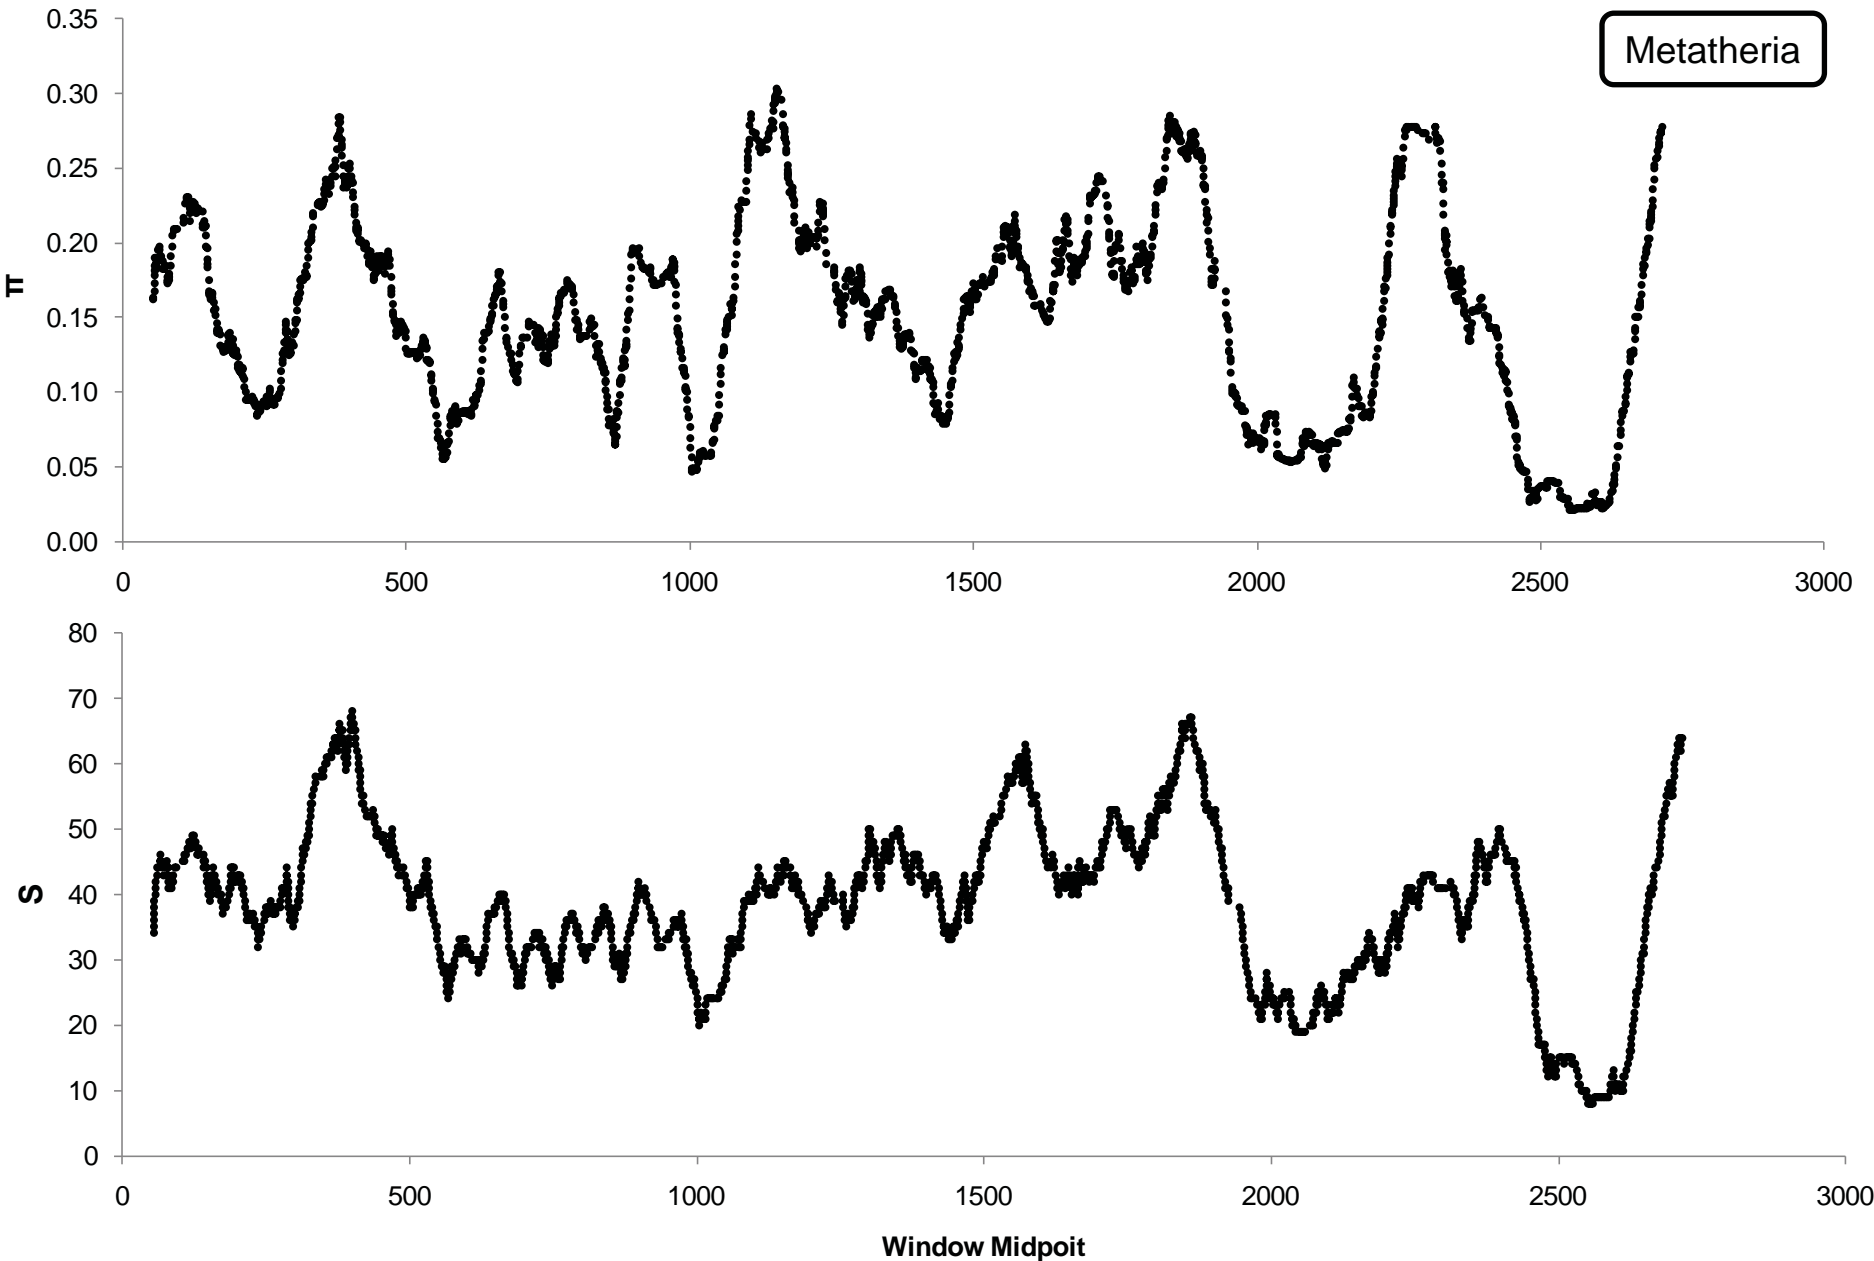



Supplementary Figure S2 (cont.)

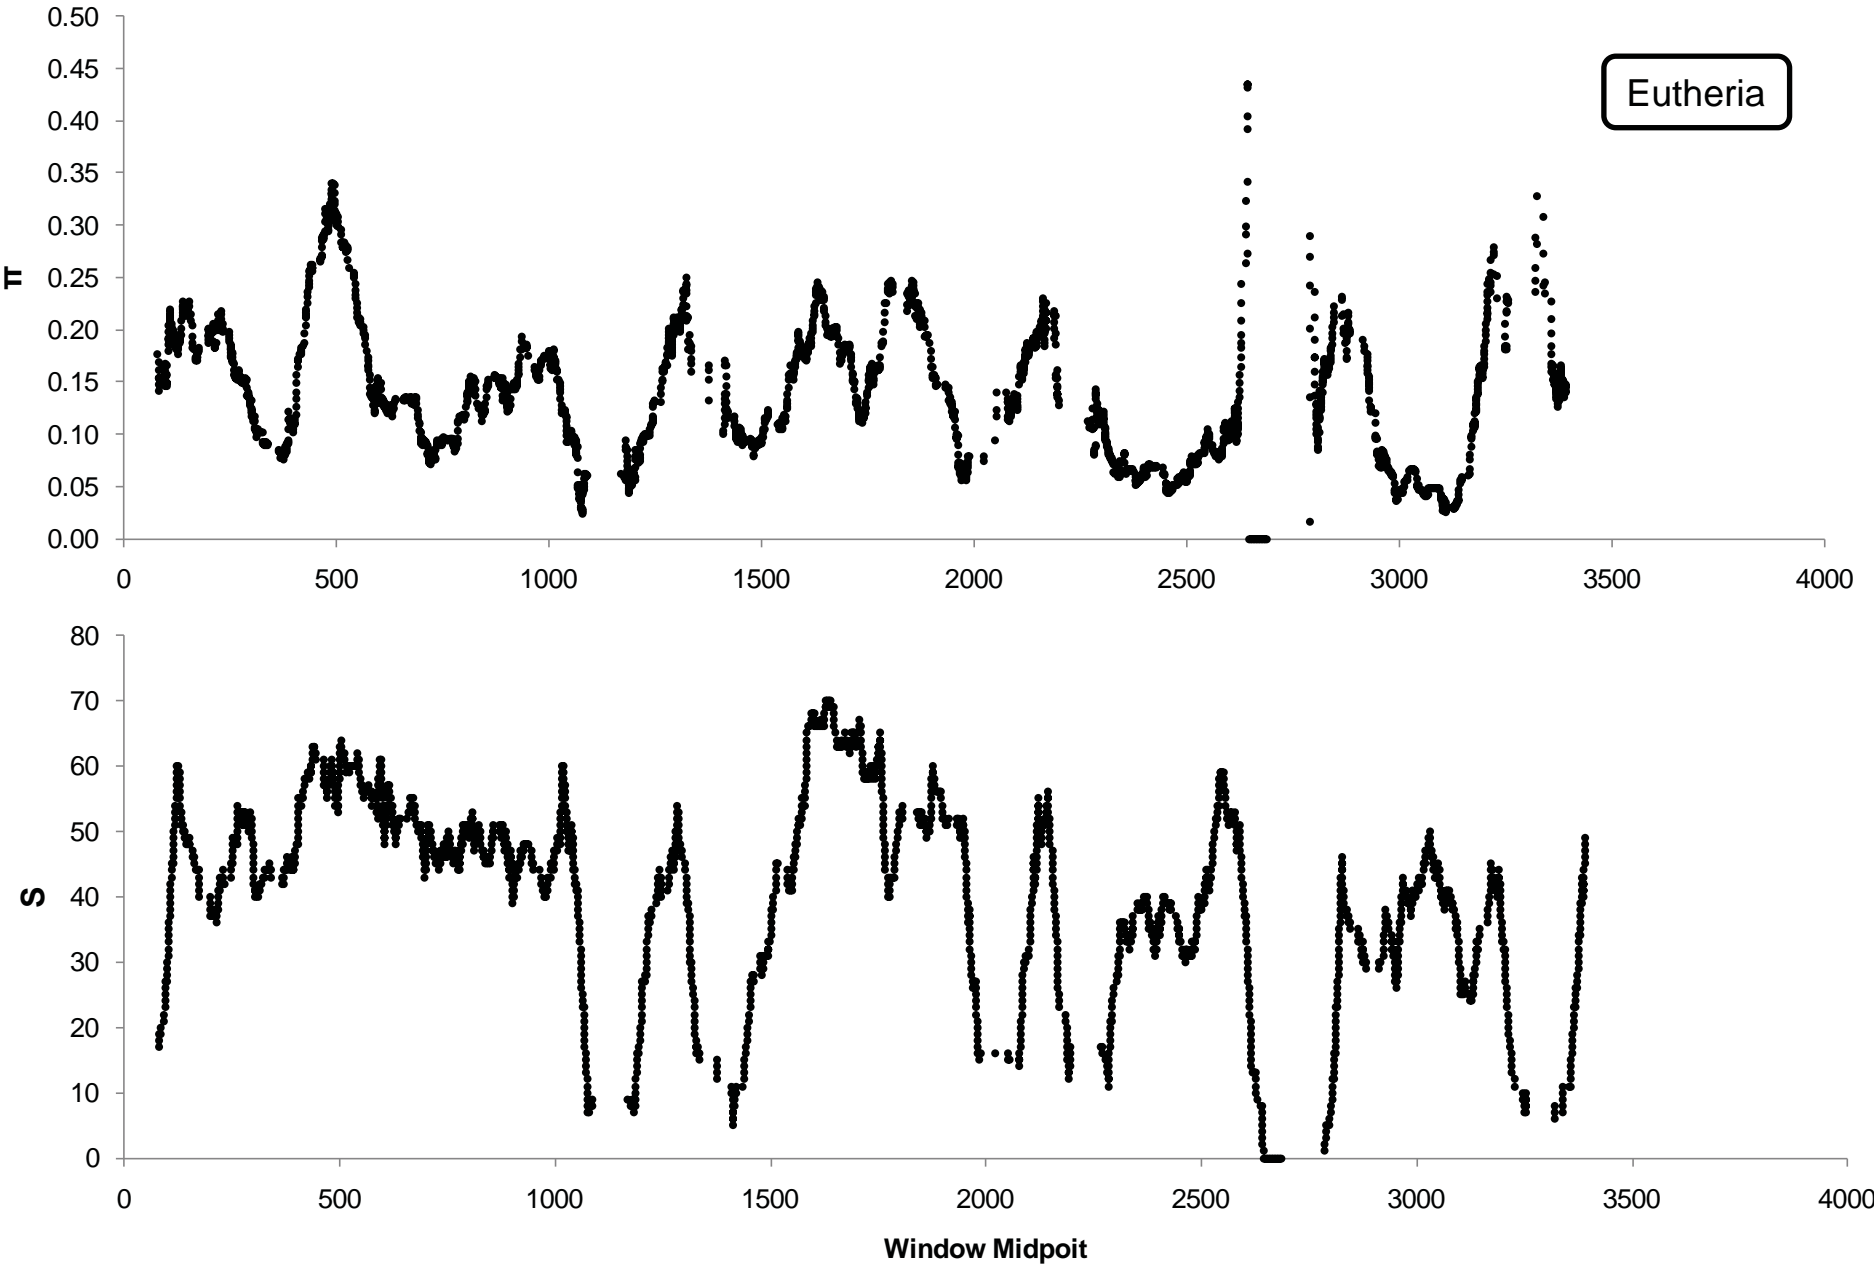

Supplementary Figure S3. SPInDel conserved regions on ribosomal RNA (rRNA) secondary structures. **(a)** *Homo sapiens* mitochondrial 12S rRNA secondary structure showing the location of eutherian conserved regions A to F. **(b)** *Xenopus laevis* 16S rRNA secondary structure showing the location of SPInDel conserved amphibian regions E, F and G. Identity plots represent the distribution of conserved (green bars) and variable (red bars) sites across the sequence alignment of rRNA genes in Eutheria (n = 237) and Amphibia (n = 84) groups. Identity plots were obtained in Geneious software, and the rRNA secondary structure diagrams were retrieved from the Comparative RNA Web (CRW) Site (<http://www.rna.ccbb.utexas.edu>).

# Supplementary Figure S3

**a**

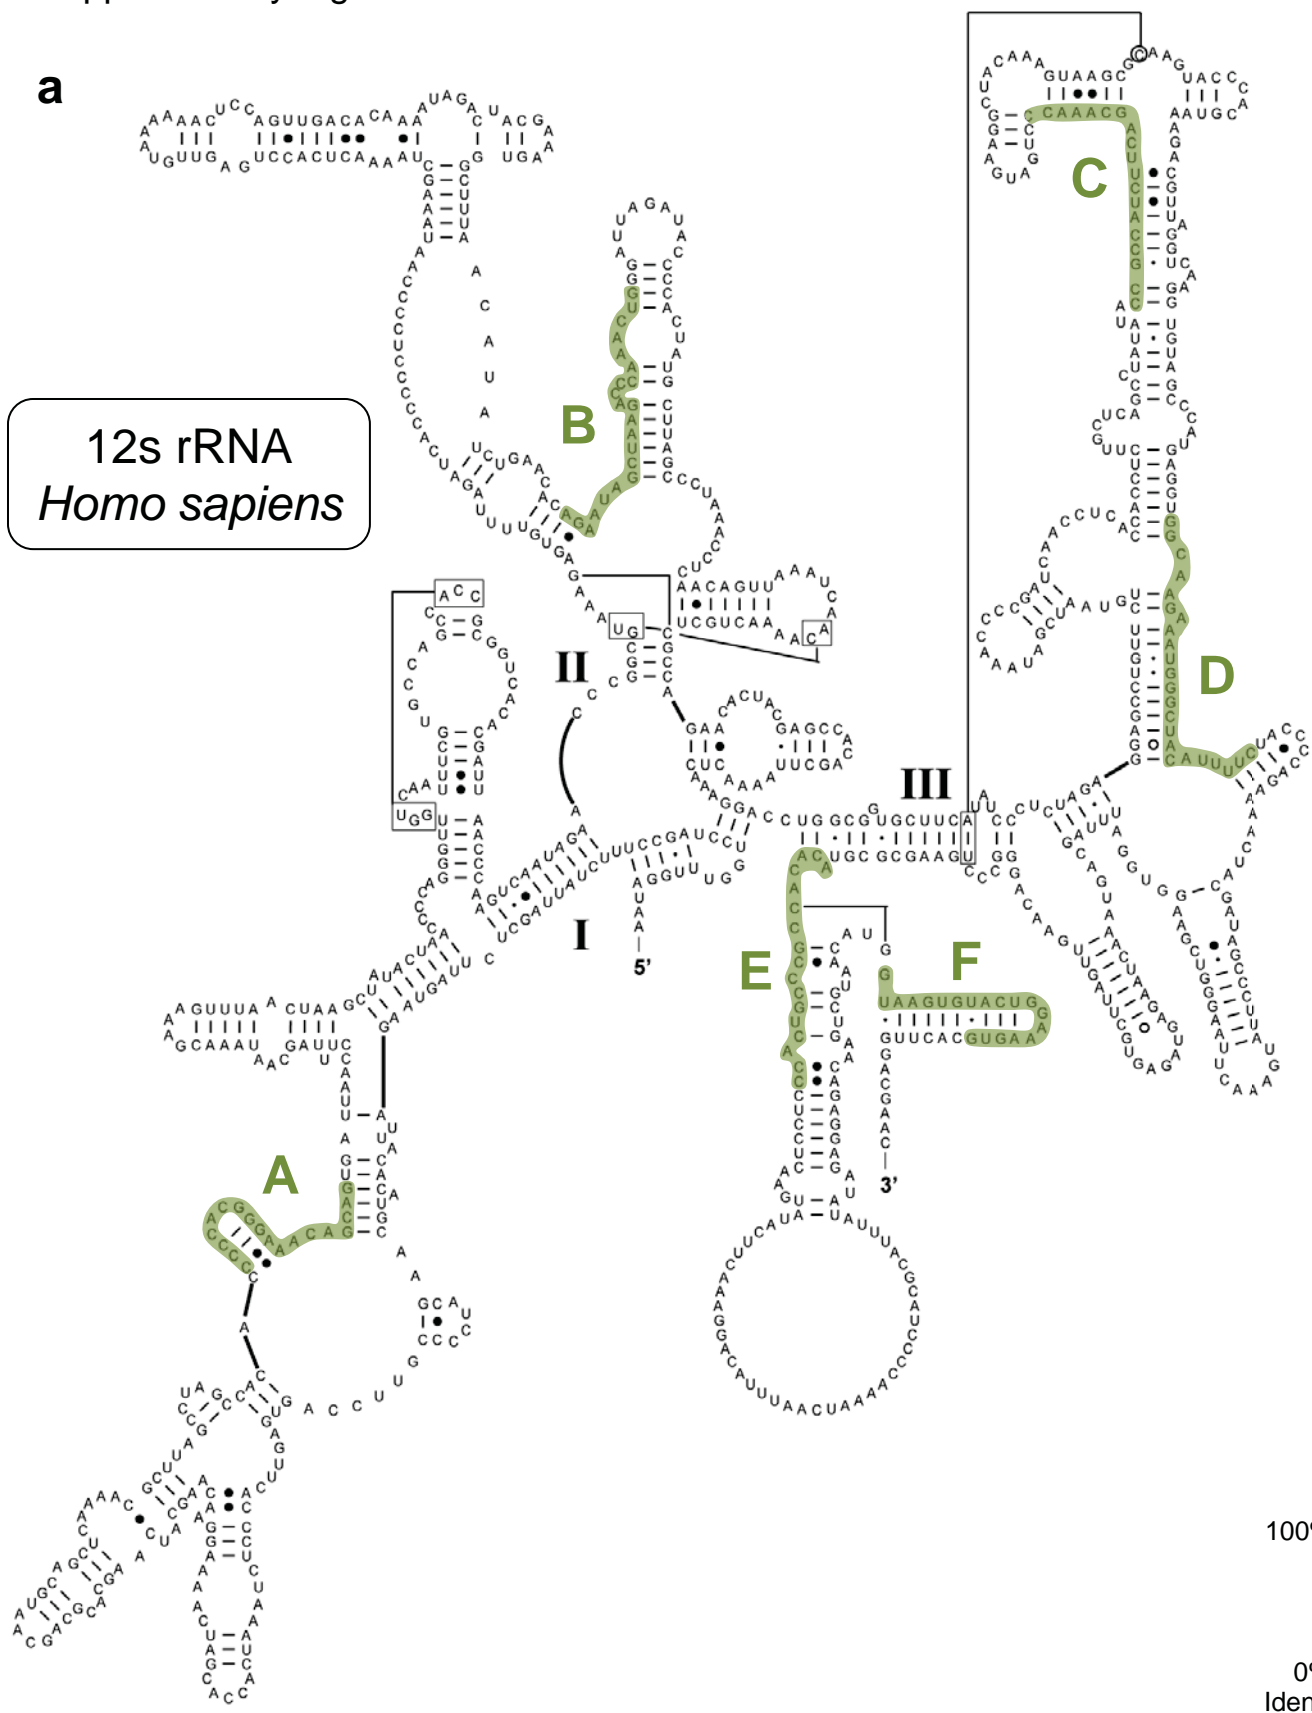

100%  
0%  
Identity

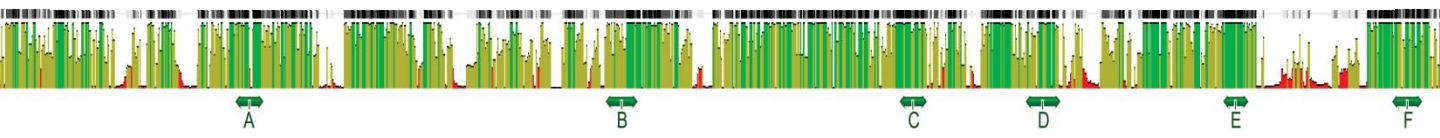

**b**

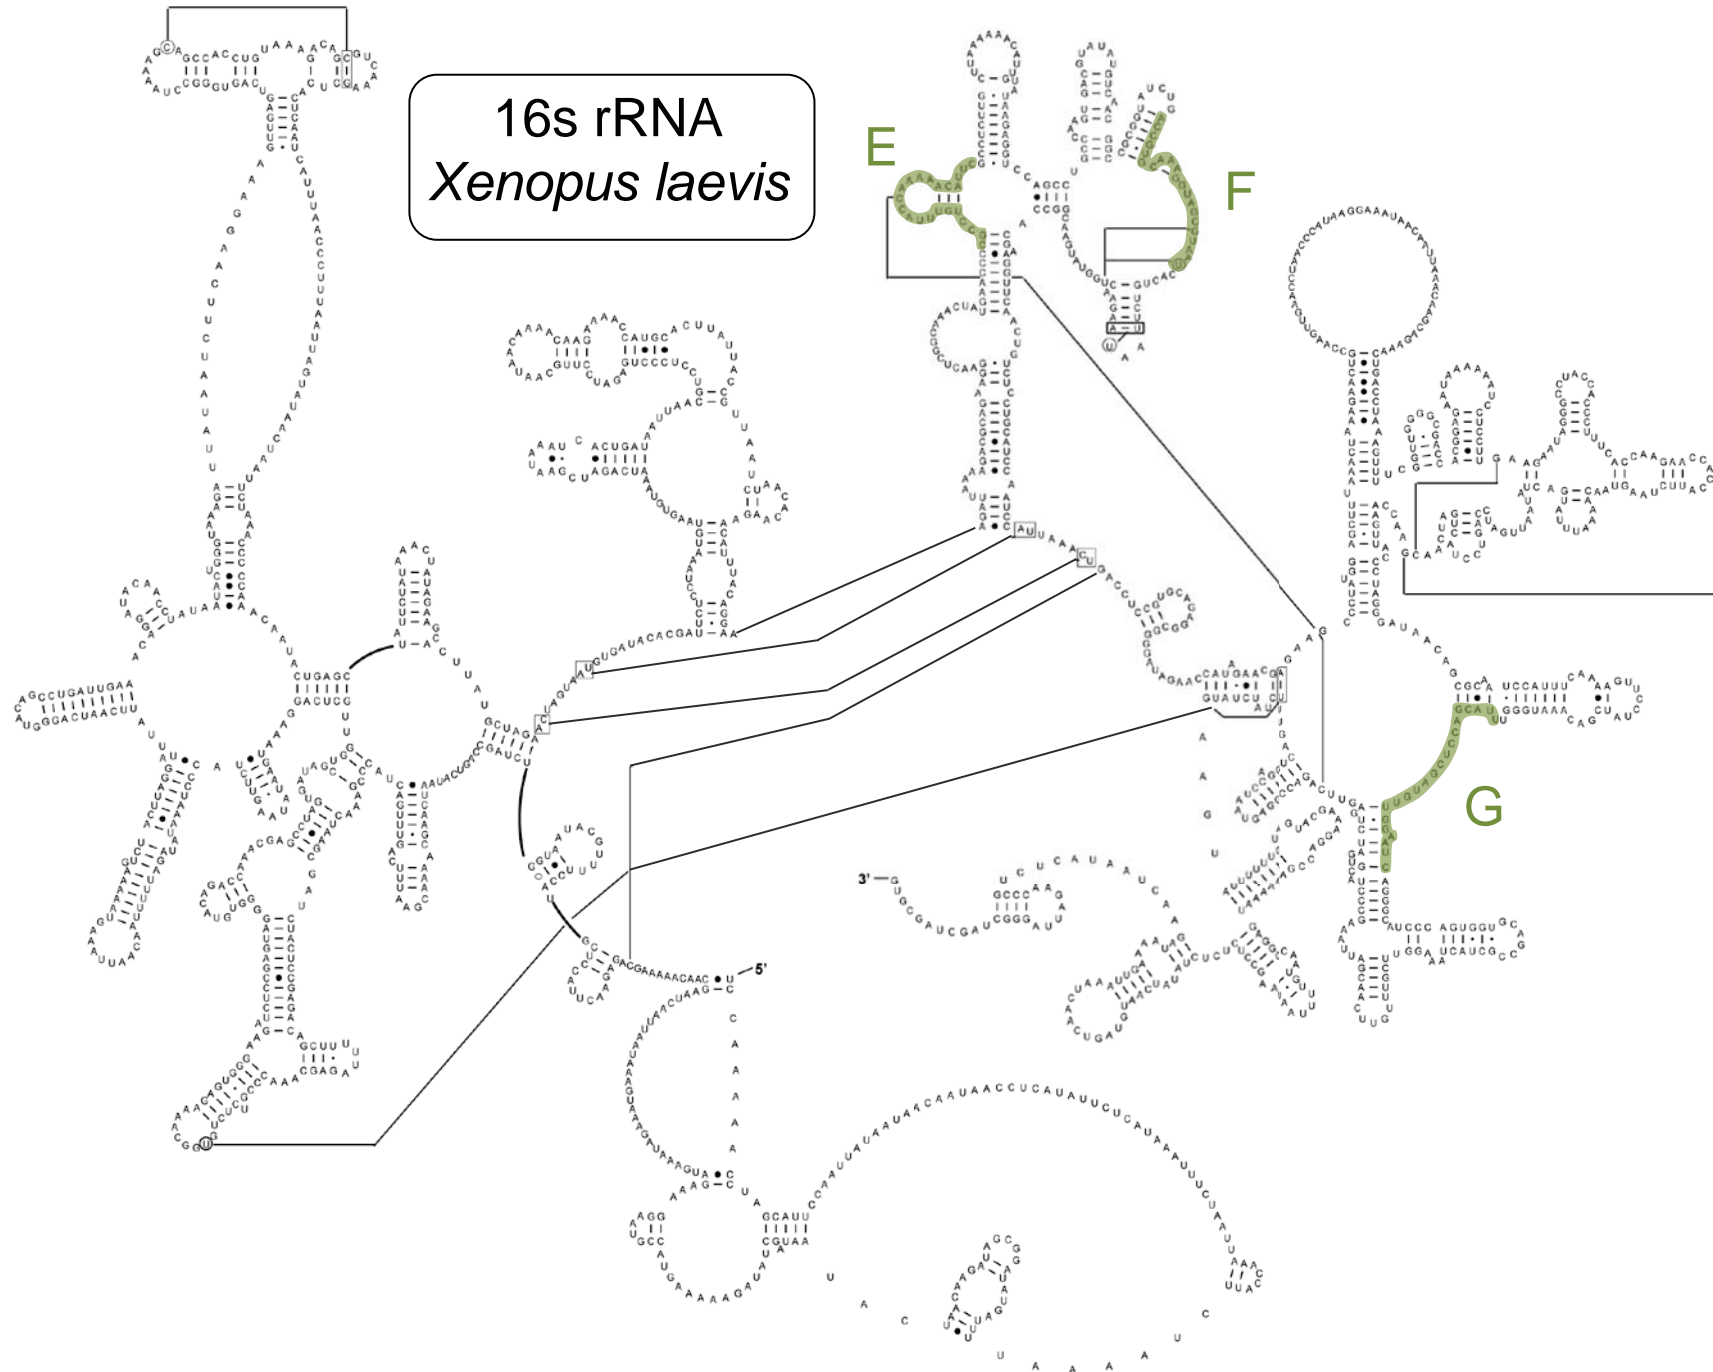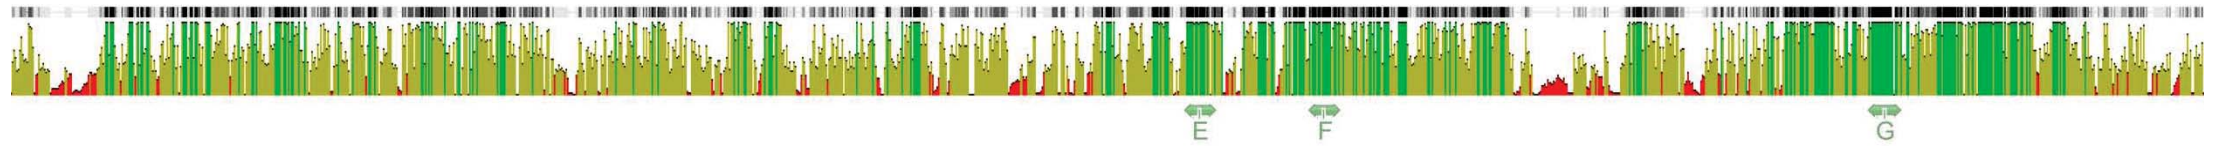

Supplementary Figure S4. Phylogenetic conservation obtained from 901 eukaryotic mitochondrial small subunit rRNA aligned sequences superimposed onto the *Zea mays* (X00794) rRNA secondary structure model. Arcs and blue tags indicate regions with variable lengths. The diagram is available on the Comparative RNA Web (CRW) Site (<http://www.rna.cccb.utexas.edu>).

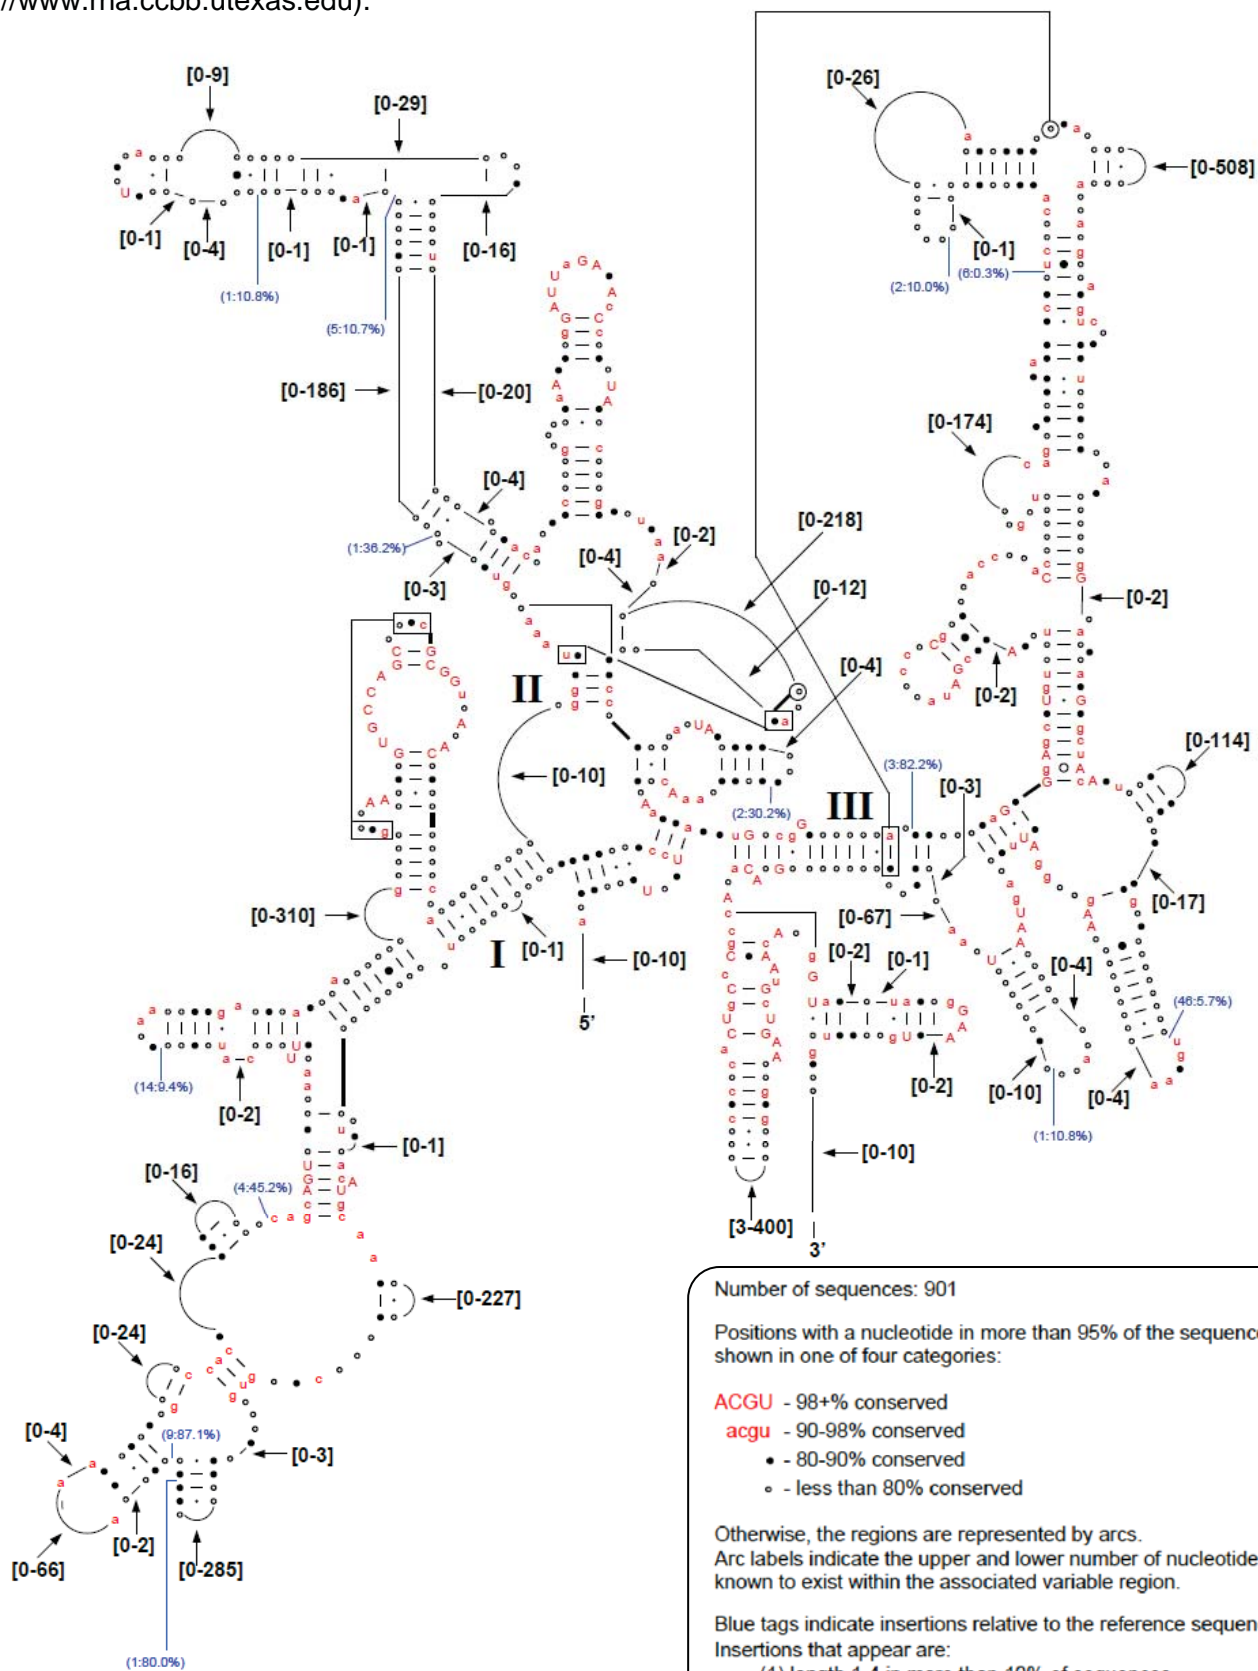

Supplementary Figure S5. Putative DNA secondary structures of mitochondrial ribosomal RNA genes. **(a)** DNA secondary structure for the *Homo sapiens* 12S rRNA gene (accession number J01415) at 37°C. **(b)** DNA secondary structure for the *Xenopus laevis* 16S rRNA gene (accession number M10217) at 20°C. Folding energies are indicated. Structures were predicted using the *mfold* web server.

**a**

12s rRNA gene  
*Homo sapiens*

-97.07 kcal/mol

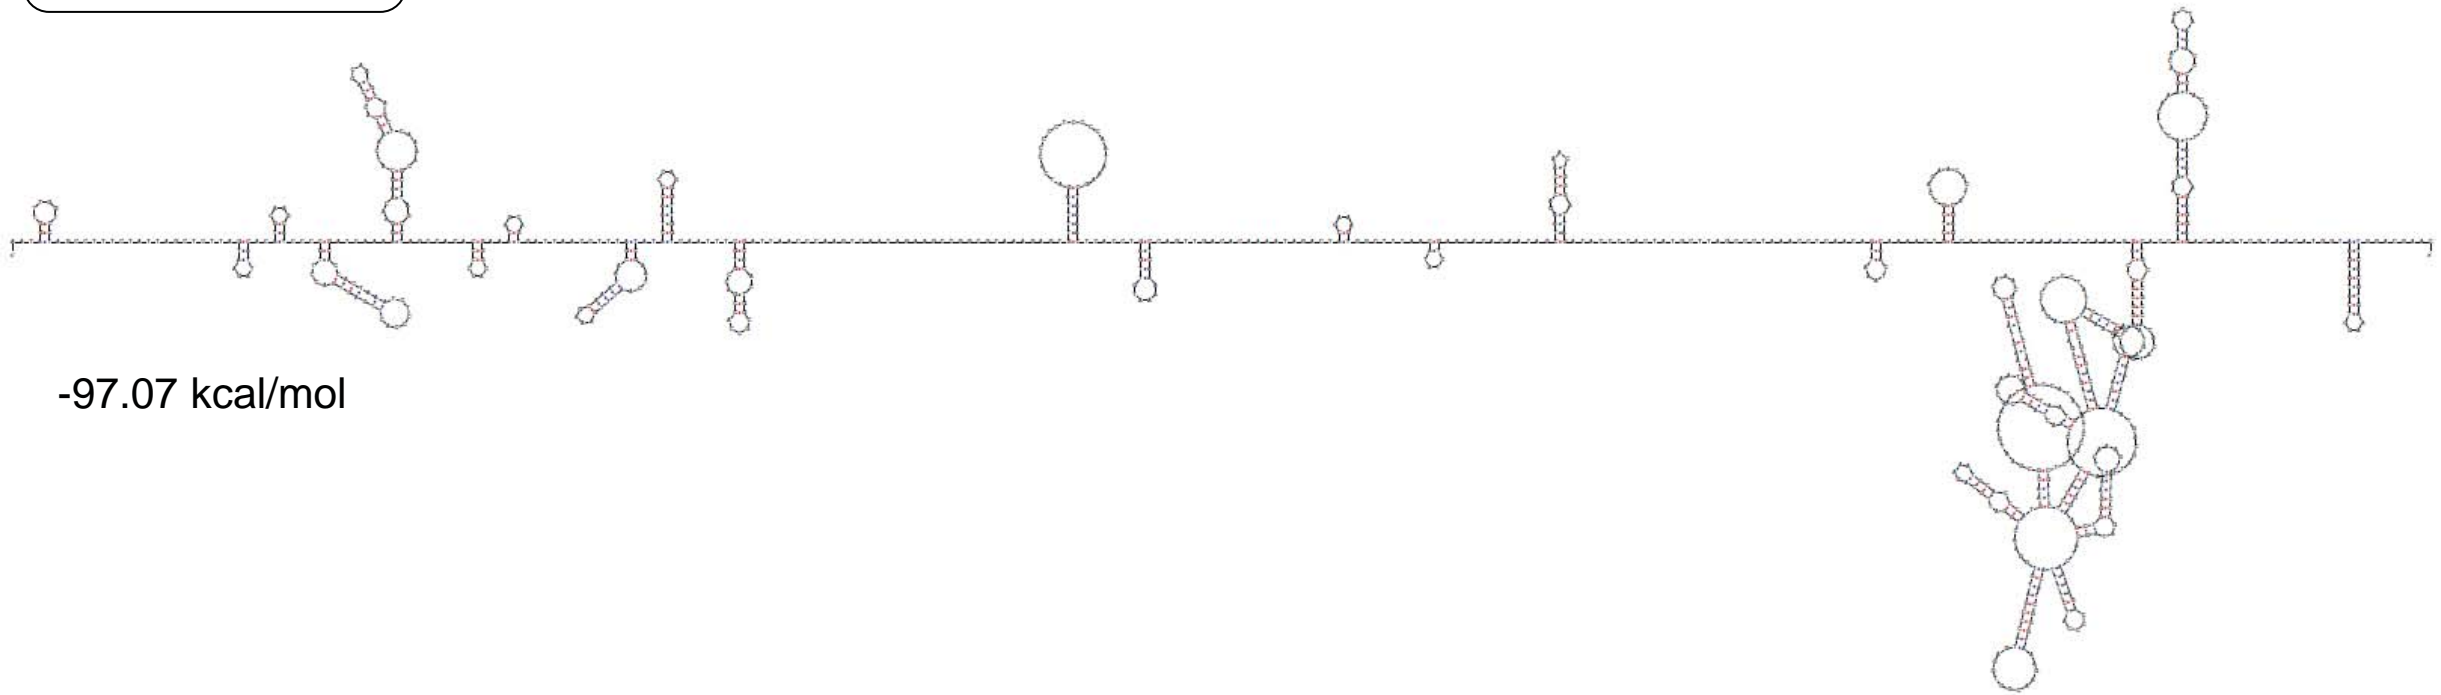

**b**

16s rRNA gene  
*Xenopus laevis*

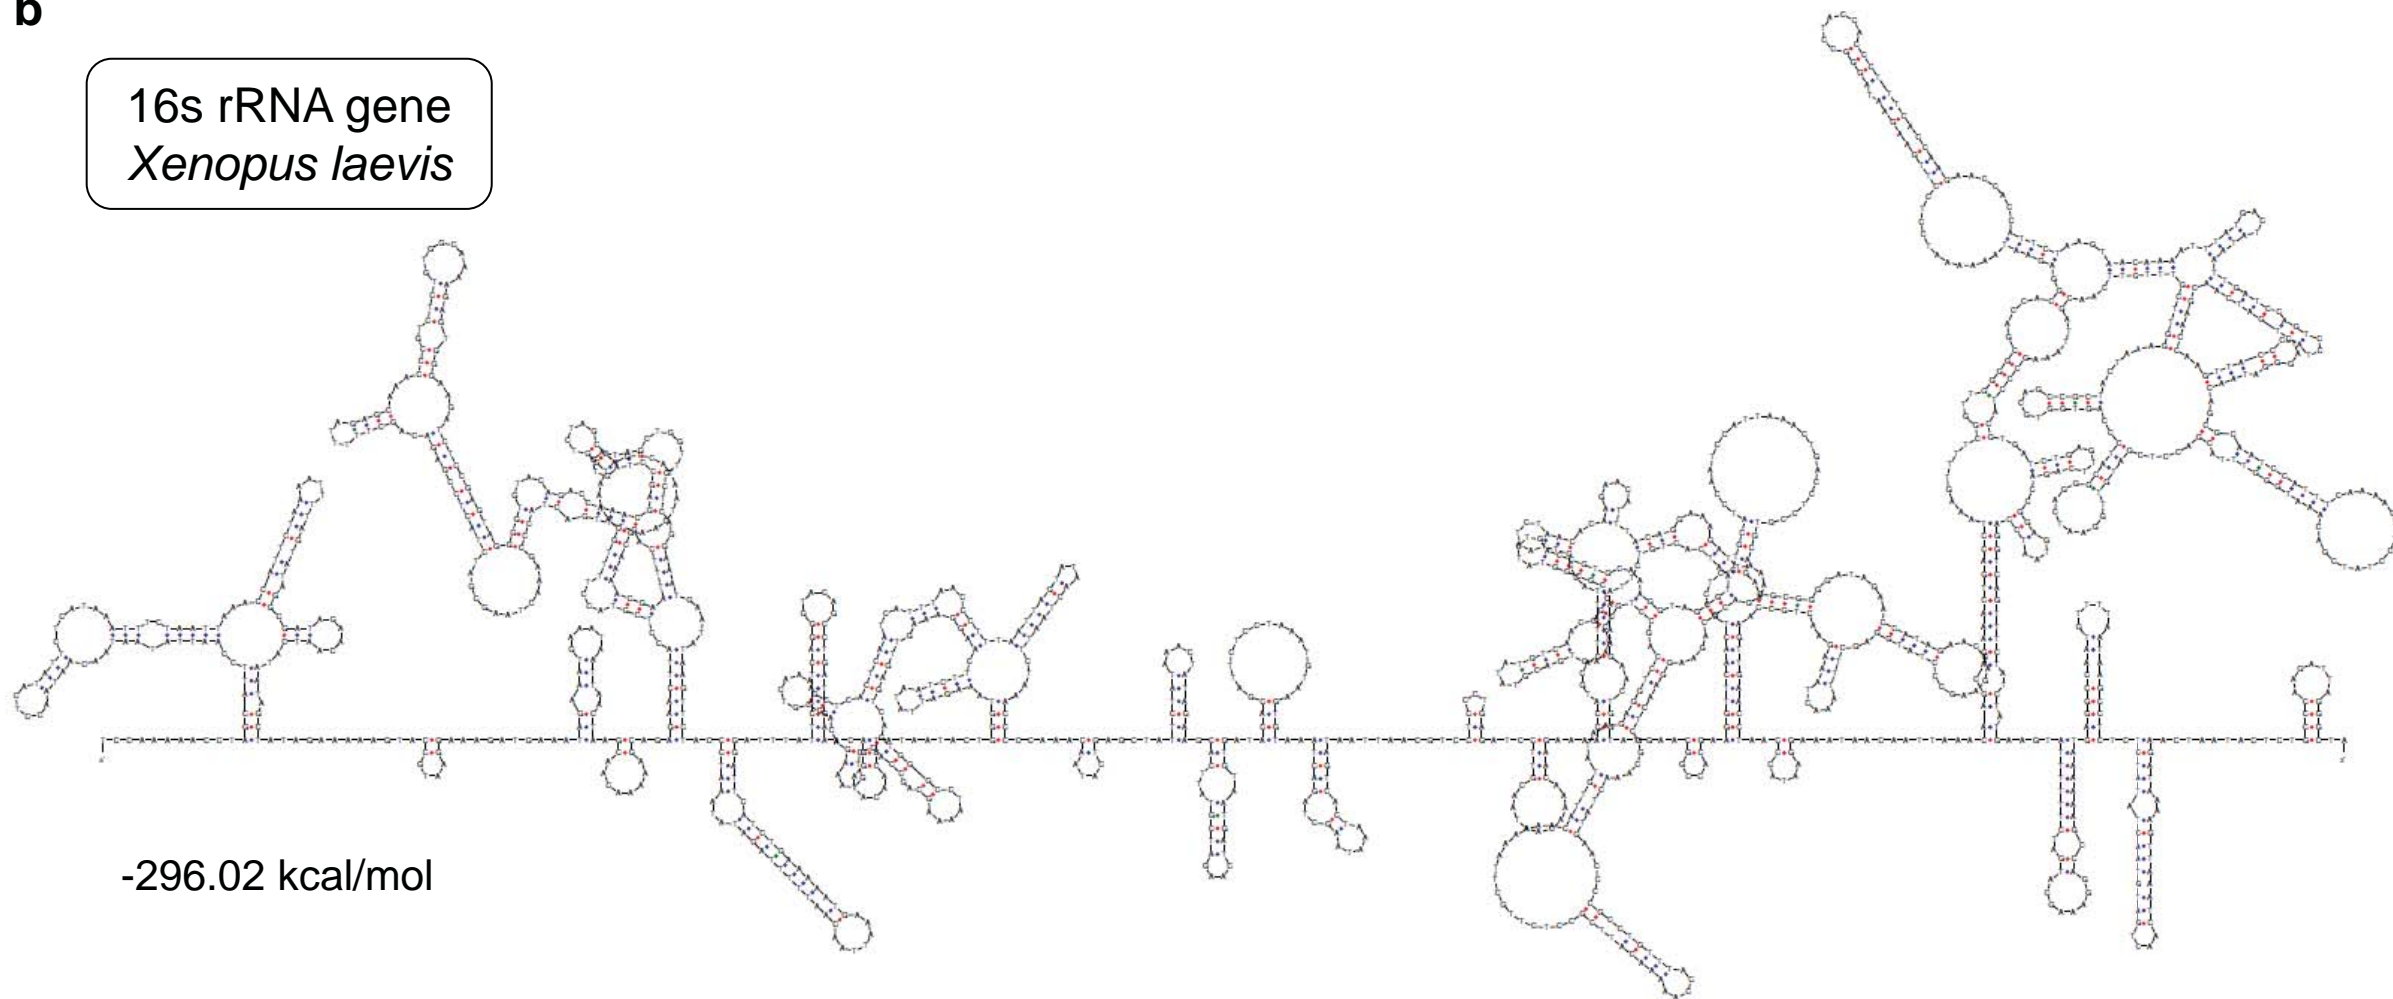

-296.02 kcal/mol

Supplementary Figure S6. Correlation between SPInDel hypervariable regions in Eutheria. **(a)** Principal component analysis. **(b)** Hierarchical clustering analysis. The hierarchical clustering was performed using average linkage correlation as a metric. Bootstrap probabilities (BP) were estimated with 1000 bootstraps.

**a**

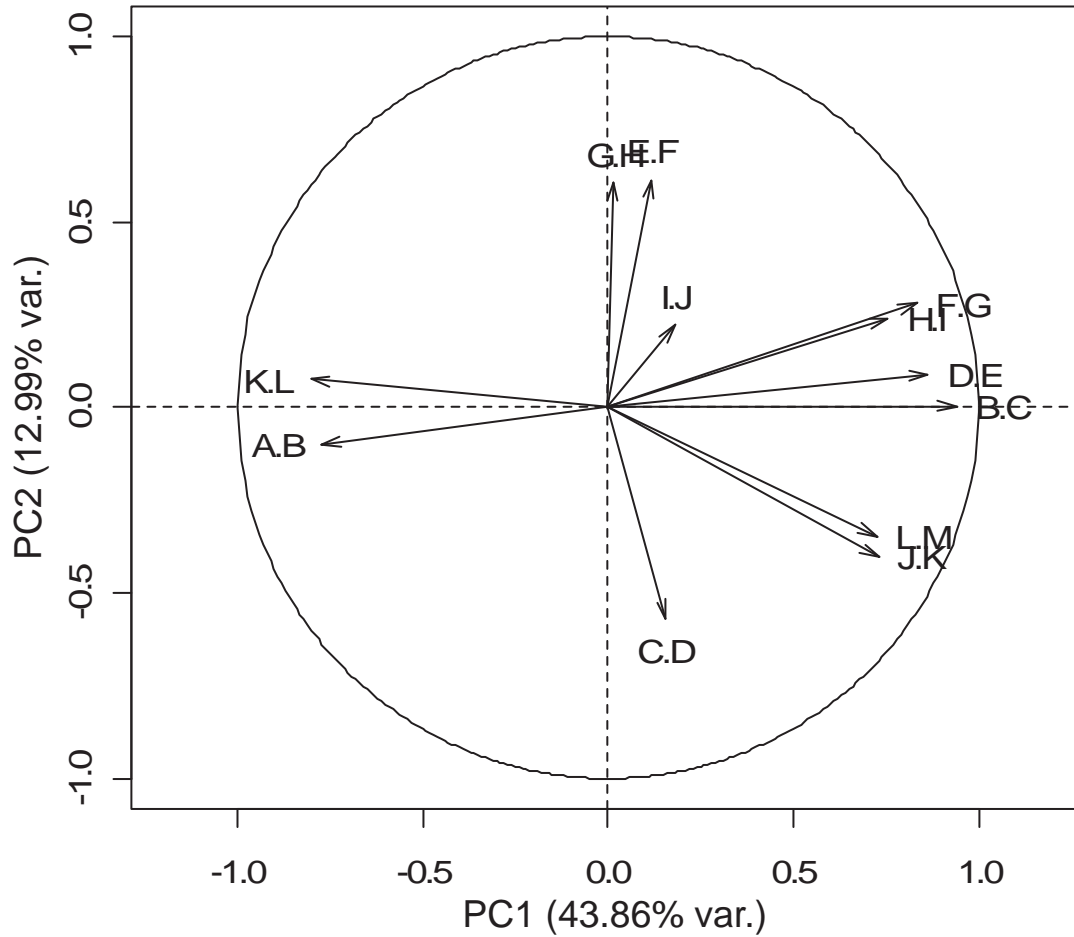

**b**

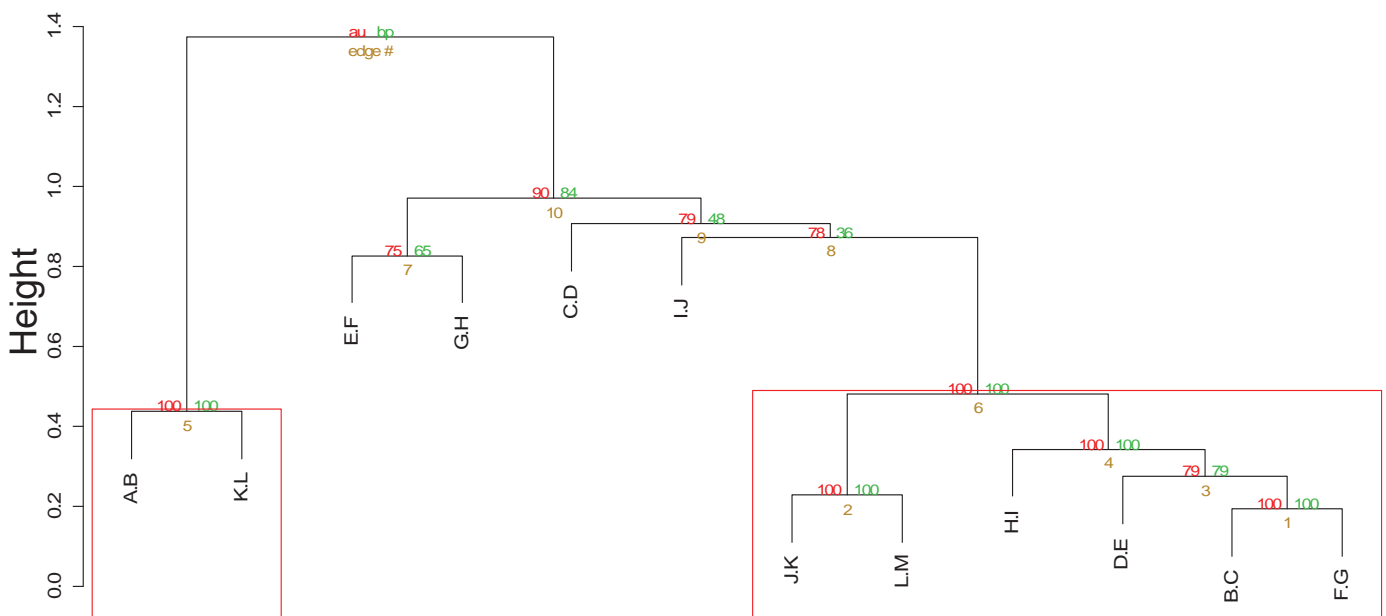



Supplementary Figure S7. Discrimination of 237 eutherian species using standard SPInDel profiles.

The matrix of pairwise distances measured by the number of different loci between profiles was used for principal component (a, b) and multidimensional scaling (c) analyses. Species were labeled according to their taxonomic categories at two different levels. The input matrix was generated in the SPInDel workbench.

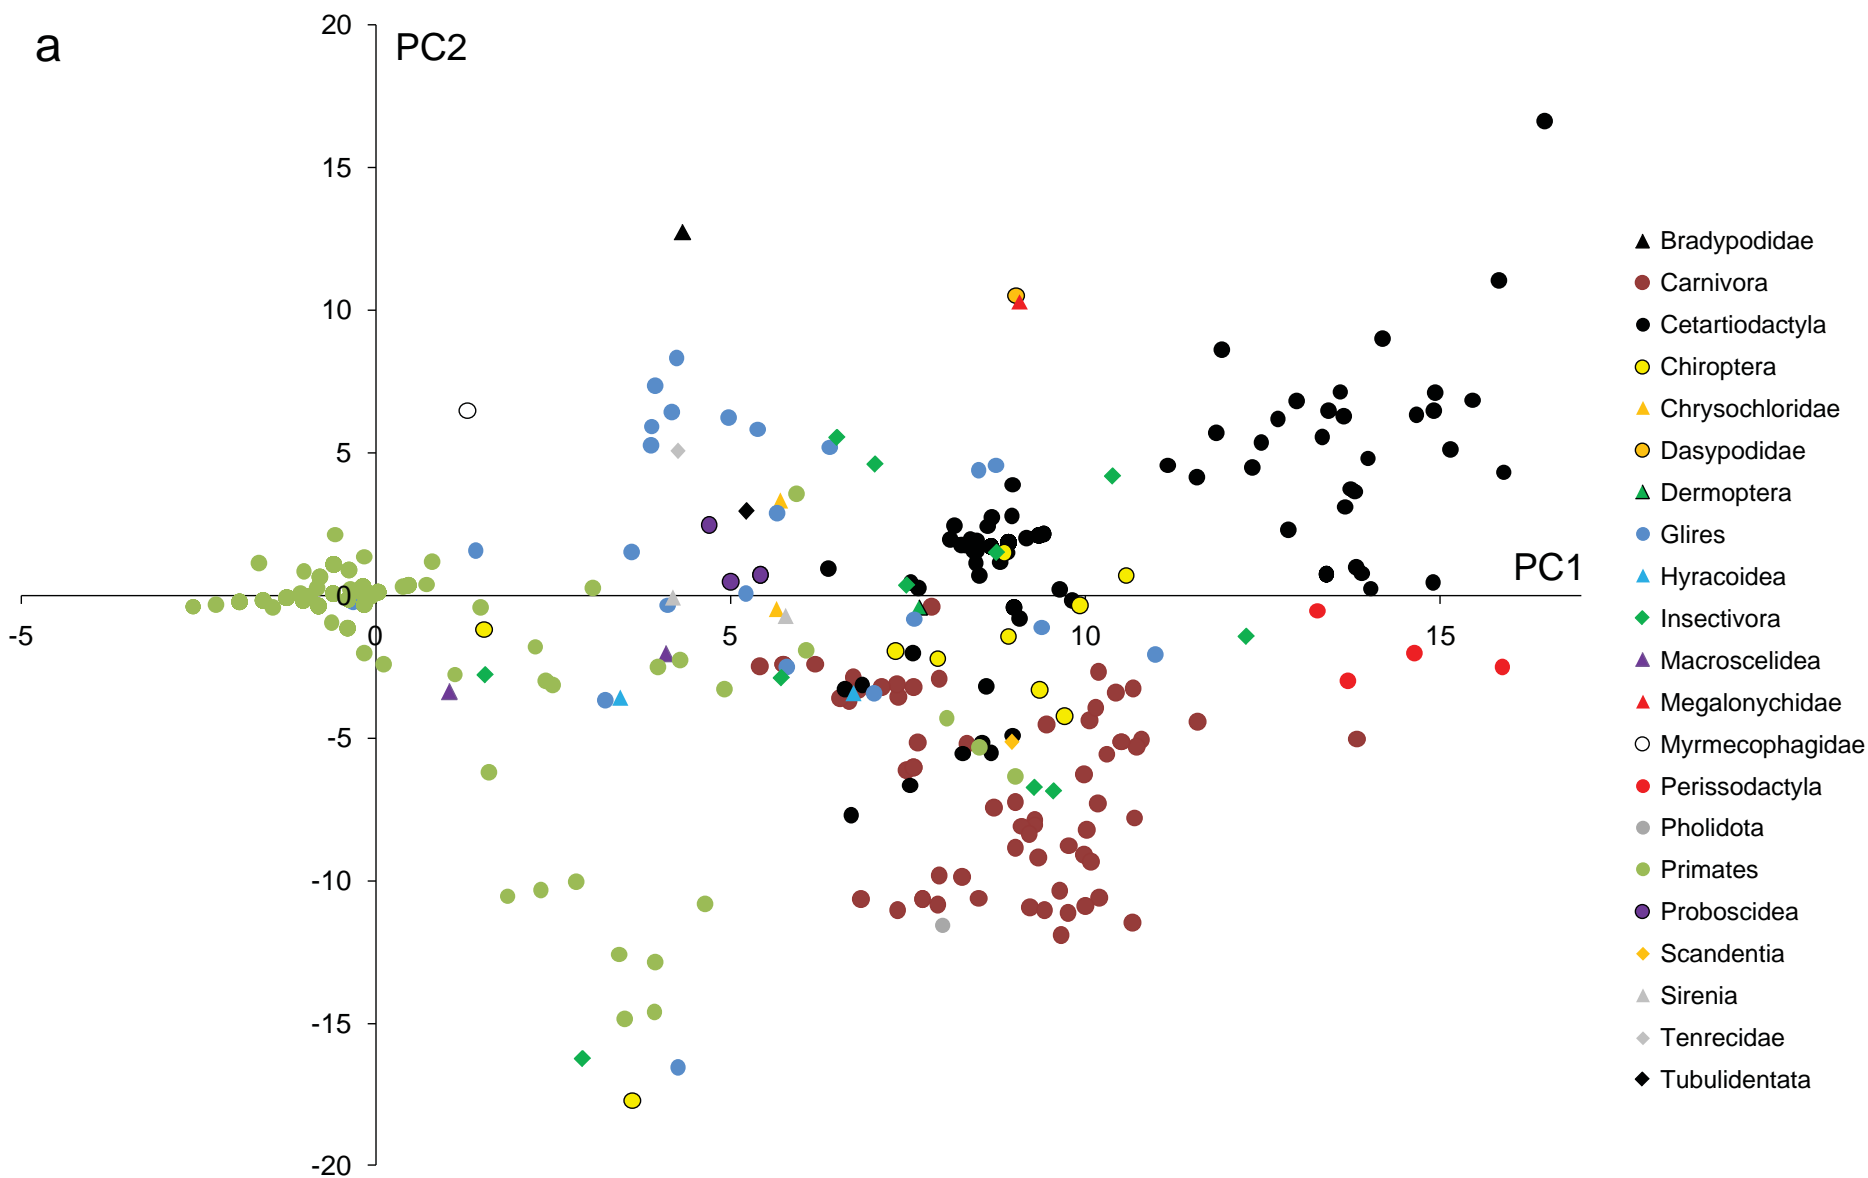

b

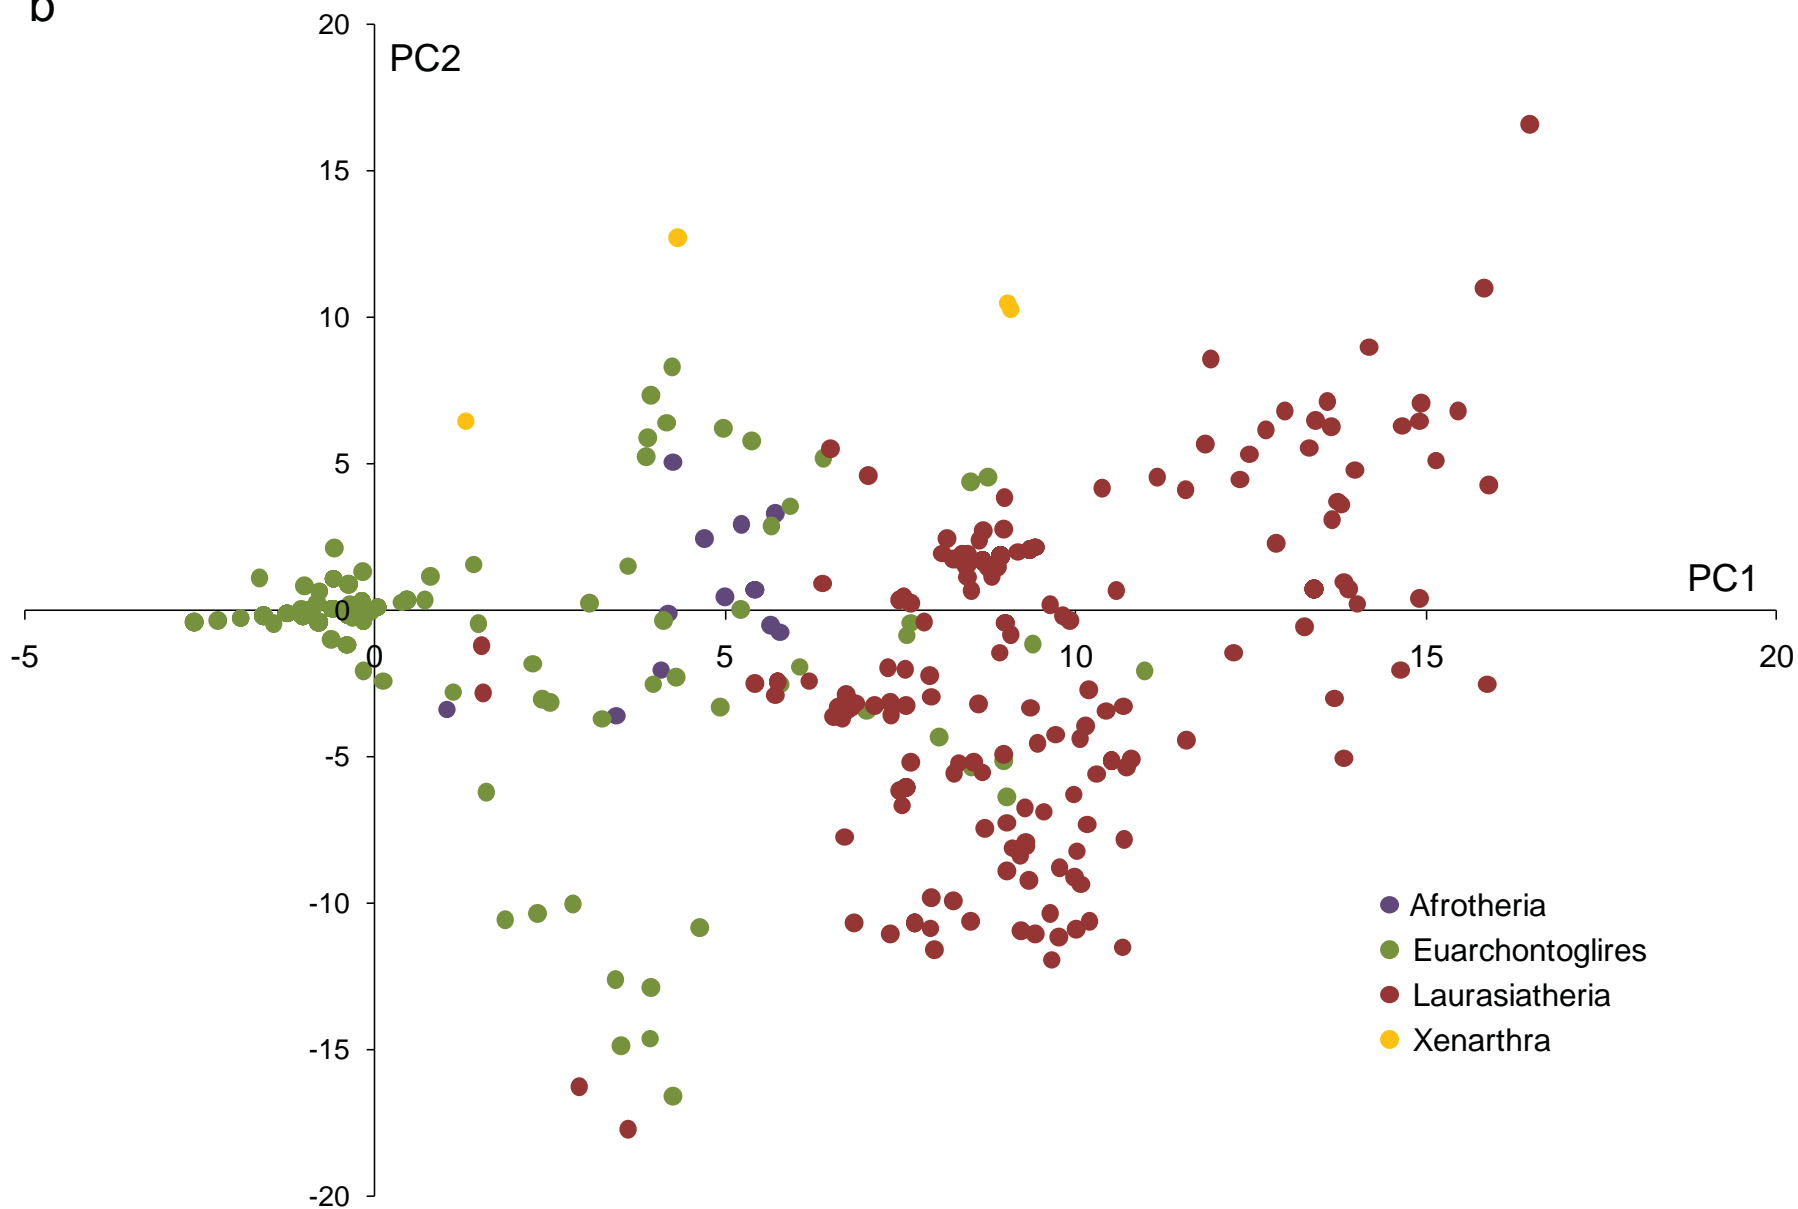

C

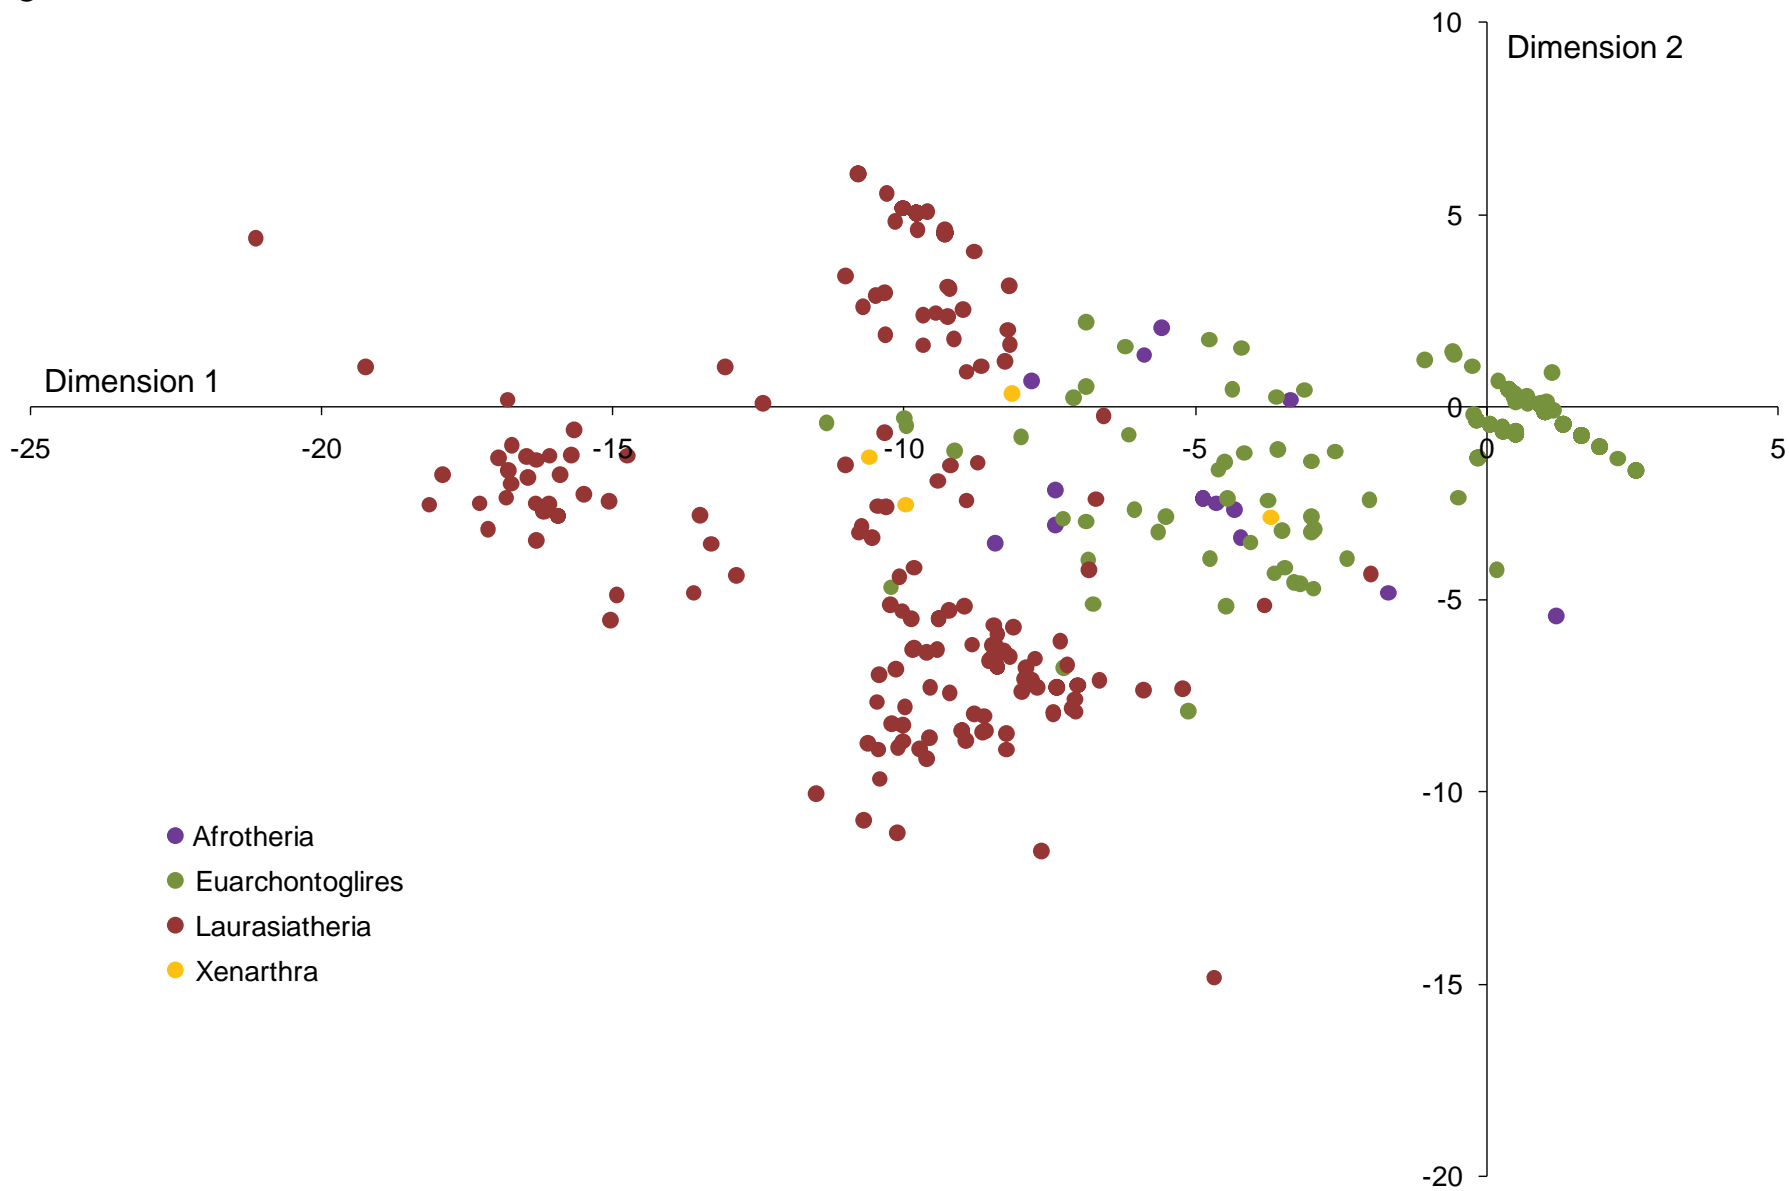

Supplement: supp_gkq865_FPereira_NAR-01675-Met-G-2010_SupMat_Part1.pdf [file supp_gkq865_FPereira_NAR-01675-Met-G-2010_SupMat_Part1.pdf]
